# Supplementary material
Source: publisher figshare collection journal article supplement (https://acs.figshare.com/ndownloader/files/5074603)
Supplement: Supplementary file 1 [file 5074603]

_publ_contact_author_name  'Professor William Clegg' 
_publ_contact_author_address     
; 
School of Natural Sciences (Chemistry)
Bedson Building
University of Newcastle upon Tyne
Newcastle upon Tyne
NE1 7RU
United Kingdom                         
;
_publ_contact_author_phone  '00 44 191 222 6649' 
_publ_contact_author_fax    '00 44 191 222 6929' 
_publ_contact_author_email  'w.clegg@ncl.ac.uk' 
_publ_requested_journal     'Crystal Growth and Design'
_publ_section_title
;
The importance of weak C--H...O bonds and \p...\p stacking interactions
in the formation of organic 1,8-bis(dimethylamino)napthalene complexes
with Z' > 1
;


loop_
        _publ_author_name
        _publ_author_footnote
        _publ_author_address

'Nichol, Gary S.'
?
;
School of Natural Sciences (Chemistry)
Bedson Building
University of Newcastle upon Tyne
Newcastle upon Tyne
NE1 7RU
United Kingdom 
;


'Clegg, William'
?
;
School of Natural Sciences (Chemistry)
Bedson Building
University of Newcastle upon Tyne
Newcastle upon Tyne
NE1 7RU
United Kingdom 
;

data_1
# LOCAL NAME GSN83

_audit_creation_method            SHELXL-97
_chemical_name_systematic
;
1-dimethylammonium,8-dimethylaminonaphthalene violurate 
methanol solvate
;
_chemical_name_common             ?
_chemical_melting_point           ?
_chemical_formula_moiety
'C14 H19 N2 +, C4 H2 N3 O4 -, C H3 O H'
_chemical_formula_sum
 'C19 H25 N5 O5'
_chemical_formula_weight          403.44

loop_
 _atom_type_symbol
 _atom_type_description
 _atom_type_scat_dispersion_real
 _atom_type_scat_dispersion_imag
 _atom_type_scat_source
 'C'  'C'   0.0033   0.0016
 'International Tables Vol C Tables 4.2.6.8 and 6.1.1.4'
 'H'  'H'   0.0000   0.0000
 'International Tables Vol C Tables 4.2.6.8 and 6.1.1.4'
 'N'  'N'   0.0061   0.0033
 'International Tables Vol C Tables 4.2.6.8 and 6.1.1.4'
 'O'  'O'   0.0106   0.0060
 'International Tables Vol C Tables 4.2.6.8 and 6.1.1.4'

_symmetry_cell_setting            monoclinic
_symmetry_space_group_name_H-M    'P 21/c'
_symmetry_space_group_name_Hall   '-P 2ybc'

loop_
 _symmetry_equiv_pos_as_xyz
 'x, y, z'
 '-x, y+1/2, -z+1/2'
 '-x, -y, -z'
 'x, -y-1/2, z-1/2'

_cell_length_a                    10.100(2)
_cell_length_b                    13.663(3)
_cell_length_c                    14.611(3)
_cell_angle_alpha                 90.00
_cell_angle_beta                  91.00(3)
_cell_angle_gamma                 90.00
_cell_volume                      2015.8(7)
_cell_formula_units_Z             4
_cell_measurement_temperature     150(2)
_cell_measurement_reflns_used     15407
_cell_measurement_theta_min       2.5
_cell_measurement_theta_max       27.5

_exptl_crystal_description        block
_exptl_crystal_colour             blue
_exptl_crystal_size_max           0.54
_exptl_crystal_size_mid           0.46
_exptl_crystal_size_min           0.33
_exptl_crystal_density_meas       ?
_exptl_crystal_density_diffrn     1.329
_exptl_crystal_density_method     'not measured'
_exptl_crystal_F_000              856
_exptl_absorpt_coefficient_mu     0.098
_exptl_absorpt_correction_type    multi-scan
_exptl_absorpt_correction_T_min   0.8571
_exptl_absorpt_correction_T_max   0.9683
_exptl_absorpt_process_details    'SADABS; Sheldrick, 2003'

_exptl_special_details
;
 ?
;

_diffrn_ambient_temperature       150(2)
_diffrn_radiation_wavelength      0.71073
_diffrn_radiation_type            MoK\a
_diffrn_radiation_source          'sealed tube'
_diffrn_radiation_monochromator   graphite
_diffrn_measurement_device_type   'Nonius KappaCCD diffractometer'
_diffrn_measurement_method        '\f and \w scans'
_diffrn_detector_area_resol_mean  ?
_diffrn_standards_number          0
_diffrn_standards_interval_count  ?
_diffrn_standards_interval_time   ?
_diffrn_standards_decay_%         ?
_diffrn_reflns_number             34321
_diffrn_reflns_av_R_equivalents   0.0494
_diffrn_reflns_av_sigmaI/netI     0.0283
_diffrn_reflns_limit_h_min        -12
_diffrn_reflns_limit_h_max        12
_diffrn_reflns_limit_k_min        -16
_diffrn_reflns_limit_k_max        16
_diffrn_reflns_limit_l_min        -17
_diffrn_reflns_limit_l_max        17
_diffrn_reflns_theta_min          4.50
_diffrn_reflns_theta_max          25.00
_reflns_number_total              3515
_reflns_number_gt                 2660
_reflns_threshold_expression      I>2\s(I)

_computing_data_collection        'Nonius COLLECT'
_computing_cell_refinement        EvalCCD
_computing_data_reduction         EvalCCD
_computing_structure_solution     'Bruker SHELXTL'
_computing_structure_refinement   'Bruker SHELXTL'
_computing_molecular_graphics     'Bruker SHELXTL'
_computing_publication_material   'Bruker SHELXTL and local programs'

_refine_special_details
;
 Refinement of F^2^ against ALL reflections.  The weighted R-factor wR and
 goodness of fit S are based on F^2^, conventional R-factors R are based
 on F, with F set to zero for negative F^2^. The threshold expression of
 F^2^ > 2sigma(F^2^) is used only for calculating R-factors(gt) etc. and is
 not relevant to the choice of reflections for refinement.  R-factors based
 on F^2^ are statistically about twice as large as those based on F, and R-
 factors based on ALL data will be even larger.
;

_refine_ls_structure_factor_coef  Fsqd
_refine_ls_matrix_type            full
_refine_ls_weighting_scheme       calc
_refine_ls_weighting_details
 'calc w=1/[\s^2^(Fo^2^)+(0.0410P)^2^+0.9823P] where P=(Fo^2^+2Fc^2^)/3'
_atom_sites_solution_primary      direct
_atom_sites_solution_secondary    difmap
_atom_sites_solution_hydrogens    difmap
_refine_ls_hydrogen_treatment     mixed
_refine_ls_extinction_method      none
_refine_ls_extinction_coef        ?
_refine_ls_number_reflns          3515
_refine_ls_number_parameters      304
_refine_ls_number_restraints      7
_refine_ls_R_factor_all           0.0618
_refine_ls_R_factor_gt            0.0385
_refine_ls_wR_factor_ref          0.0967
_refine_ls_wR_factor_gt           0.0860
_refine_ls_goodness_of_fit_ref    1.030
_refine_ls_restrained_S_all       1.040
_refine_ls_shift/su_max           0.001
_refine_ls_shift/su_mean          0.000

loop_
 _atom_site_label
 _atom_site_type_symbol
 _atom_site_fract_x
 _atom_site_fract_y
 _atom_site_fract_z
 _atom_site_U_iso_or_equiv
 _atom_site_adp_type
 _atom_site_occupancy
 _atom_site_symmetry_multiplicity
 _atom_site_calc_flag
 _atom_site_refinement_flags
 _atom_site_disorder_assembly
 _atom_site_disorder_group
O1 O 0.08049(12) 0.83222(10) 0.29810(10) 0.0410(4) Uani 1 1 d . A .
O2 O 0.15008(11) 1.03685(9) 0.53937(8) 0.0277(3) Uani 1 1 d . A .
O3 O 0.51445(11) 0.91318(9) 0.40873(8) 0.0256(3) Uani 1 1 d . A .
O4 O 0.46903(13) 0.78945(11) 0.26417(10) 0.0300(4) Uani 0.853(3) 1 d PD A 1
O4' O 0.2906(10) 0.7454(7) 0.2322(7) 0.055(3) Uani 0.147(3) 1 d PD A 2
N1 N 0.39439(14) 0.31571(10) 0.43288(10) 0.0234(3) Uani 1 1 d . . .
N2 N 0.32929(14) 0.46231(11) 0.32835(9) 0.0223(3) Uani 1 1 d . . .
H2N H 0.369(2) 0.3894(18) 0.3619(15) 0.061(7) Uiso 1 1 d . . .
N3 N 0.11794(14) 0.93060(11) 0.42031(10) 0.0242(4) Uani 1 1 d . A .
H3N H 0.037(2) 0.9357(14) 0.4272(13) 0.029 Uiso 1 1 d . . .
N4 N 0.32879(13) 0.96914(11) 0.47354(10) 0.0205(3) Uani 1 1 d . A .
H4N H 0.3774(18) 1.0029(14) 0.5116(13) 0.025 Uiso 1 1 d . . .
N5 N 0.34831(15) 0.80266(11) 0.27604(10) 0.0294(4) Uani 1 1 d D . .
C1 C 0.31532(16) 0.35838(13) 0.50541(12) 0.0243(4) Uani 1 1 d . . .
C2 C 0.30182(19) 0.31074(15) 0.58757(13) 0.0342(5) Uani 1 1 d . . .
H2 H 0.3421 0.2486 0.5967 0.041 Uiso 1 1 calc R . .
C3 C 0.2290(2) 0.35327(17) 0.65805(13) 0.0396(5) Uani 1 1 d . . .
H3 H 0.2188 0.3191 0.7141 0.048 Uiso 1 1 calc R . .
C4 C 0.17259(19) 0.44339(16) 0.64668(12) 0.0354(5) Uani 1 1 d . . .
H4 H 0.1262 0.4722 0.6959 0.042 Uiso 1 1 calc R . .
C5 C 0.18212(17) 0.49462(14) 0.56284(12) 0.0281(4) Uani 1 1 d . . .
C6 C 0.25366(16) 0.45141(13) 0.48924(11) 0.0231(4) Uani 1 1 d . . .
C7 C 0.25619(16) 0.50506(12) 0.40518(11) 0.0227(4) Uani 1 1 d . . .
C8 C 0.19330(17) 0.59331(13) 0.39463(13) 0.0286(4) Uani 1 1 d . . .
H8 H 0.1956 0.6264 0.3375 0.034 Uiso 1 1 calc R . .
C9 C 0.12523(18) 0.63493(14) 0.46845(14) 0.0344(5) Uani 1 1 d . . .
H9 H 0.0824 0.6964 0.4613 0.041 Uiso 1 1 calc R . .
C10 C 0.12084(18) 0.58704(14) 0.55009(13) 0.0337(5) Uani 1 1 d . . .
H10 H 0.0757 0.6163 0.5996 0.040 Uiso 1 1 calc R . .
C11 C 0.3466(2) 0.21742(14) 0.40466(13) 0.0354(5) Uani 1 1 d . . .
H11A H 0.3587 0.1715 0.4556 0.053 Uiso 1 1 calc R . .
H11B H 0.3971 0.1947 0.3521 0.053 Uiso 1 1 calc R . .
H11C H 0.2525 0.2211 0.3876 0.053 Uiso 1 1 calc R . .
C12 C 0.53739(17) 0.31306(15) 0.45911(13) 0.0315(4) Uani 1 1 d . . .
H12A H 0.5691 0.3799 0.4703 0.047 Uiso 1 1 calc R . .
H12B H 0.5878 0.2836 0.4095 0.047 Uiso 1 1 calc R . .
H12C H 0.5494 0.2740 0.5149 0.047 Uiso 1 1 calc R . .
C13 C 0.44348(19) 0.52461(14) 0.30096(13) 0.0338(5) Uani 1 1 d . . .
H13A H 0.4104 0.5865 0.2756 0.051 Uiso 1 1 calc R . .
H13B H 0.4949 0.4903 0.2546 0.051 Uiso 1 1 calc R . .
H13C H 0.5001 0.5379 0.3547 0.051 Uiso 1 1 calc R . .
C14 C 0.24211(19) 0.43787(15) 0.24754(12) 0.0331(5) Uani 1 1 d . . .
H14A H 0.1672 0.3982 0.2676 0.050 Uiso 1 1 calc R . .
H14B H 0.2931 0.4010 0.2027 0.050 Uiso 1 1 calc R . .
H14C H 0.2091 0.4985 0.2194 0.050 Uiso 1 1 calc R . .
C15 C 0.16243(17) 0.87123(13) 0.34985(12) 0.0244(4) Uani 1 1 d . . .
C16 C 0.19540(16) 0.98156(12) 0.48139(11) 0.0204(4) Uani 1 1 d . . .
C17 C 0.39160(16) 0.91380(12) 0.40821(11) 0.0189(4) Uani 1 1 d . . .
C18 C 0.30571(16) 0.86213(12) 0.34407(11) 0.0214(4) Uani 1 1 d . A .
O5 O 0.18069(15) 0.67630(12) 0.15359(11) 0.0391(5) Uani 0.853(3) 1 d P A 1
H5O H 0.2043 0.7203 0.1906 0.047 Uiso 0.853(3) 1 calc PR A 1
C19 C 0.0407(4) 0.6704(2) 0.15049(18) 0.0341(7) Uani 0.853(3) 1 d PU A 1
H19A H 0.0062 0.6805 0.2120 0.051 Uiso 0.853(3) 1 calc PR A 1
H19B H 0.0138 0.6056 0.1281 0.051 Uiso 0.853(3) 1 calc PR A 1
H19C H 0.0053 0.7208 0.1092 0.051 Uiso 0.853(3) 1 calc PR A 1
O5' O -0.0310(9) 0.7421(7) 0.1699(5) 0.039(3) Uani 0.147(3) 1 d P A 2
H5O' H -0.0022 0.7410 0.2242 0.047 Uiso 0.147(3) 1 calc PR A 2
C19' C 0.028(3) 0.6632(18) 0.1192(13) 0.0342(14) Uani 0.147(3) 1 d PU A 2
H19D H 0.1174 0.6819 0.1012 0.051 Uiso 0.147(3) 1 calc PR A 2
H19E H -0.0262 0.6496 0.0643 0.051 Uiso 0.147(3) 1 calc PR A 2
H19F H 0.0324 0.6045 0.1576 0.051 Uiso 0.147(3) 1 calc PR A 2

loop_
 _atom_site_aniso_label
 _atom_site_aniso_U_11
 _atom_site_aniso_U_22
 _atom_site_aniso_U_33
 _atom_site_aniso_U_23
 _atom_site_aniso_U_13
 _atom_site_aniso_U_12
O1 0.0242(7) 0.0507(9) 0.0480(9) -0.0244(7) -0.0058(6) -0.0019(6)
O2 0.0189(6) 0.0351(7) 0.0291(7) -0.0108(6) 0.0008(5) 0.0024(5)
O3 0.0156(6) 0.0329(7) 0.0282(7) -0.0074(5) 0.0015(5) 0.0007(5)
O4 0.0200(8) 0.0372(9) 0.0329(9) -0.0118(7) 0.0044(6) 0.0049(6)
O4' 0.053(7) 0.058(7) 0.054(7) -0.015(6) -0.004(5) -0.011(6)
N1 0.0234(8) 0.0230(8) 0.0237(8) 0.0015(6) -0.0028(6) -0.0020(6)
N2 0.0246(8) 0.0246(8) 0.0178(7) 0.0012(6) 0.0004(6) -0.0023(6)
N3 0.0128(7) 0.0302(9) 0.0296(8) -0.0078(7) -0.0005(6) 0.0008(6)
N4 0.0155(7) 0.0243(8) 0.0218(8) -0.0064(6) -0.0009(6) -0.0013(6)
N5 0.0277(9) 0.0300(9) 0.0308(9) -0.0046(7) 0.0062(7) 0.0021(7)
C1 0.0223(9) 0.0286(10) 0.0219(9) 0.0011(8) -0.0011(7) -0.0057(7)
C2 0.0352(11) 0.0379(11) 0.0295(10) 0.0100(9) -0.0005(9) -0.0035(9)
C3 0.0424(12) 0.0529(14) 0.0236(10) 0.0123(10) 0.0034(9) -0.0038(10)
C4 0.0339(11) 0.0503(13) 0.0221(10) -0.0022(9) 0.0062(8) -0.0080(10)
C5 0.0242(9) 0.0342(11) 0.0258(10) -0.0045(8) 0.0024(8) -0.0086(8)
C6 0.0191(9) 0.0283(10) 0.0219(9) -0.0012(7) -0.0024(7) -0.0073(7)
C7 0.0223(9) 0.0249(10) 0.0210(9) -0.0016(7) 0.0001(7) -0.0033(7)
C8 0.0295(10) 0.0275(10) 0.0287(10) 0.0025(8) -0.0005(8) -0.0020(8)
C9 0.0320(10) 0.0262(10) 0.0451(12) -0.0035(9) 0.0051(9) 0.0022(8)
C10 0.0303(10) 0.0355(11) 0.0356(11) -0.0097(9) 0.0091(9) -0.0053(9)
C11 0.0450(12) 0.0285(11) 0.0325(11) -0.0002(9) -0.0051(9) -0.0088(9)
C12 0.0261(10) 0.0364(11) 0.0319(10) 0.0006(9) -0.0044(8) 0.0006(8)
C13 0.0359(11) 0.0304(11) 0.0355(11) -0.0010(9) 0.0116(9) -0.0066(8)
C14 0.0388(11) 0.0362(11) 0.0241(10) -0.0037(8) -0.0079(8) 0.0030(9)
C15 0.0228(9) 0.0238(9) 0.0266(9) -0.0051(8) -0.0014(8) -0.0003(7)
C16 0.0174(8) 0.0225(9) 0.0214(9) -0.0005(7) 0.0007(7) 0.0005(7)
C17 0.0191(9) 0.0178(9) 0.0196(9) 0.0024(7) 0.0018(7) 0.0016(7)
C18 0.0204(9) 0.0224(9) 0.0216(9) -0.0014(7) 0.0013(7) -0.0001(7)
O5 0.0373(10) 0.0355(10) 0.0445(10) -0.0116(8) 0.0001(8) -0.0065(7)
C19 0.0407(15) 0.0315(13) 0.0299(18) -0.0096(16) 0.0000(16) -0.0078(11)
O5' 0.051(6) 0.054(7) 0.013(4) -0.010(4) 0.005(4) -0.010(5)
C19' 0.041(2) 0.030(2) 0.032(3) -0.008(3) 0.001(3) -0.007(2)

_geom_special_details
;
 All esds (except the esd in the dihedral angle between two l.s. planes)
 are estimated using the full covariance matrix.  The cell esds are taken
 into account individually in the estimation of esds in distances, angles
 and torsion angles; correlations between esds in cell parameters are only
 used when they are defined by crystal symmetry.  An approximate (isotropic)
 treatment of cell esds is used for estimating esds involving l.s. planes.
;

loop_
 _geom_bond_atom_site_label_1
 _geom_bond_atom_site_label_2
 _geom_bond_distance
 _geom_bond_site_symmetry_2
 _geom_bond_publ_flag
O1 C15 1.232(2) . ?
O2 C16 1.229(2) . ?
O3 C17 1.2407(19) . ?
O4 N5 1.2476(19) . ?
O4' N5 1.162(7) . ?
N1 H2N 1.47(2) . ?
N1 C1 1.459(2) . ?
N1 C11 1.483(2) . ?
N1 C12 1.488(2) . ?
N2 H2N 1.18(2) . ?
N2 C7 1.475(2) . ?
N2 C13 1.494(2) . ?
N2 C14 1.498(2) . ?
N3 H3N 0.83(2) . ?
N3 C15 1.391(2) . ?
N3 C16 1.367(2) . ?
N4 H4N 0.87(2) . ?
N4 C16 1.365(2) . ?
N4 C17 1.381(2) . ?
N5 C18 1.359(2) . ?
C1 C2 1.374(2) . ?
C1 C6 1.433(3) . ?
C2 H2 0.9500 . ?
C2 C3 1.402(3) . ?
C3 H3 0.9500 . ?
C3 C4 1.366(3) . ?
C4 H4 0.9500 . ?
C4 C5 1.416(3) . ?
C5 C6 1.433(2) . ?
C5 C10 1.417(3) . ?
C6 C7 1.431(2) . ?
C7 C8 1.370(3) . ?
C8 H8 0.9500 . ?
C8 C9 1.409(3) . ?
C9 H9 0.9500 . ?
C9 C10 1.362(3) . ?
C10 H10 0.9500 . ?
C11 H11A 0.9800 . ?
C11 H11B 0.9800 . ?
C11 H11C 0.9800 . ?
C12 H12A 0.9800 . ?
C12 H12B 0.9800 . ?
C12 H12C 0.9800 . ?
C13 H13A 0.9800 . ?
C13 H13B 0.9800 . ?
C13 H13C 0.9800 . ?
C14 H14A 0.9800 . ?
C14 H14B 0.9800 . ?
C14 H14C 0.9800 . ?
C15 C18 1.456(2) . ?
C17 C18 1.449(2) . ?
O5 H5O 0.8400 . ?
O5 C19 1.416(4) . ?
C19 H19A 0.9800 . ?
C19 H19B 0.9800 . ?
C19 H19C 0.9800 . ?
O5' H5O' 0.8400 . ?
O5' C19' 1.44(2) . ?
C19' H19D 0.9800 . ?
C19' H19E 0.9800 . ?
C19' H19F 0.9800 . ?

loop_
 _geom_angle_atom_site_label_1
 _geom_angle_atom_site_label_2
 _geom_angle_atom_site_label_3
 _geom_angle
 _geom_angle_site_symmetry_1
 _geom_angle_site_symmetry_3
 _geom_angle_publ_flag
H2N N1 C1 98.5(9) . . ?
H2N N1 C11 111.9(9) . . ?
H2N N1 C12 110.9(9) . . ?
C1 N1 C11 112.59(14) . . ?
C1 N1 C12 111.32(13) . . ?
C11 N1 C12 111.06(14) . . ?
H2N N2 C7 100.9(11) . . ?
H2N N2 C13 109.6(11) . . ?
H2N N2 C14 109.3(11) . . ?
C7 N2 C13 112.17(14) . . ?
C7 N2 C14 113.14(14) . . ?
C13 N2 C14 111.21(14) . . ?
H3N N3 C15 118.1(13) . . ?
H3N N3 C16 115.7(13) . . ?
C15 N3 C16 126.26(15) . . ?
H4N N4 C16 115.3(12) . . ?
H4N N4 C17 118.2(12) . . ?
C16 N4 C17 126.32(15) . . ?
O4 N5 O4' 108.0(6) . . ?
O4 N5 C18 120.70(16) . . ?
O4' N5 C18 130.1(6) . . ?
N1 C1 C2 120.58(16) . . ?
N1 C1 C6 118.44(15) . . ?
C2 C1 C6 120.97(17) . . ?
C1 C2 H2 119.8 . . ?
C1 C2 C3 120.43(19) . . ?
H2 C2 C3 119.8 . . ?
C2 C3 H3 119.8 . . ?
C2 C3 C4 120.49(18) . . ?
H3 C3 C4 119.8 . . ?
C3 C4 H4 119.4 . . ?
C3 C4 C5 121.10(18) . . ?
H4 C4 C5 119.4 . . ?
C4 C5 C6 119.23(17) . . ?
C4 C5 C10 121.21(17) . . ?
C6 C5 C10 119.55(16) . . ?
C1 C6 C5 117.71(16) . . ?
C1 C6 C7 125.56(16) . . ?
C5 C6 C7 116.73(16) . . ?
N2 C7 C6 117.84(15) . . ?
N2 C7 C8 120.01(15) . . ?
C6 C7 C8 122.15(16) . . ?
C7 C8 H8 120.0 . . ?
C7 C8 C9 120.03(17) . . ?
H8 C8 C9 120.0 . . ?
C8 C9 H9 120.0 . . ?
C8 C9 C10 120.03(18) . . ?
H9 C9 C10 120.0 . . ?
C5 C10 C9 121.49(17) . . ?
C5 C10 H10 119.3 . . ?
C9 C10 H10 119.3 . . ?
N1 C11 H11A 109.5 . . ?
N1 C11 H11B 109.5 . . ?
N1 C11 H11C 109.5 . . ?
H11A C11 H11B 109.5 . . ?
H11A C11 H11C 109.5 . . ?
H11B C11 H11C 109.5 . . ?
N1 C12 H12A 109.5 . . ?
N1 C12 H12B 109.5 . . ?
N1 C12 H12C 109.5 . . ?
H12A C12 H12B 109.5 . . ?
H12A C12 H12C 109.5 . . ?
H12B C12 H12C 109.5 . . ?
N2 C13 H13A 109.5 . . ?
N2 C13 H13B 109.5 . . ?
N2 C13 H13C 109.5 . . ?
H13A C13 H13B 109.5 . . ?
H13A C13 H13C 109.5 . . ?
H13B C13 H13C 109.5 . . ?
N2 C14 H14A 109.5 . . ?
N2 C14 H14B 109.5 . . ?
N2 C14 H14C 109.5 . . ?
H14A C14 H14B 109.5 . . ?
H14A C14 H14C 109.5 . . ?
H14B C14 H14C 109.5 . . ?
O1 C15 N3 118.95(15) . . ?
O1 C15 C18 125.79(16) . . ?
N3 C15 C18 115.26(15) . . ?
O2 C16 N3 123.16(15) . . ?
O2 C16 N4 120.95(15) . . ?
N3 C16 N4 115.88(15) . . ?
O3 C17 N4 118.09(15) . . ?
O3 C17 C18 126.01(15) . . ?
N4 C17 C18 115.90(14) . . ?
N5 C18 C15 114.89(15) . . ?
N5 C18 C17 124.78(15) . . ?
C15 C18 C17 120.33(15) . . ?
H5O O5 C19 109.5 . . ?
O5 C19 H19A 109.5 . . ?
O5 C19 H19B 109.5 . . ?
O5 C19 H19C 109.5 . . ?
H19A C19 H19B 109.5 . . ?
H19A C19 H19C 109.5 . . ?
H19B C19 H19C 109.5 . . ?
H5O' O5' C19' 109.5 . . ?
O5' C19' H19D 109.5 . . ?
O5' C19' H19E 109.5 . . ?
O5' C19' H19F 109.5 . . ?
H19D C19' H19E 109.5 . . ?
H19D C19' H19F 109.5 . . ?
H19E C19' H19F 109.5 . . ?

loop_
 _geom_torsion_atom_site_label_1
 _geom_torsion_atom_site_label_2
 _geom_torsion_atom_site_label_3
 _geom_torsion_atom_site_label_4
 _geom_torsion
 _geom_torsion_site_symmetry_1
 _geom_torsion_site_symmetry_2
 _geom_torsion_site_symmetry_3
 _geom_torsion_site_symmetry_4
 _geom_torsion_publ_flag
C11 N1 C1 C2 58.3(2) . . . . ?
C11 N1 C1 C6 -122.47(16) . . . . ?
C12 N1 C1 C2 -67.2(2) . . . . ?
C12 N1 C1 C6 112.07(17) . . . . ?
N1 C1 C2 C3 178.13(17) . . . . ?
C6 C1 C2 C3 -1.1(3) . . . . ?
C1 C2 C3 C4 -1.2(3) . . . . ?
C2 C3 C4 C5 2.2(3) . . . . ?
C3 C4 C5 C6 -0.8(3) . . . . ?
C3 C4 C5 C10 178.38(18) . . . . ?
N1 C1 C6 C5 -176.82(14) . . . . ?
N1 C1 C6 C7 3.8(2) . . . . ?
C2 C1 C6 C5 2.4(2) . . . . ?
C2 C1 C6 C7 -176.97(17) . . . . ?
C4 C5 C6 C1 -1.5(2) . . . . ?
C4 C5 C6 C7 177.97(16) . . . . ?
C10 C5 C6 C1 179.33(16) . . . . ?
C10 C5 C6 C7 -1.2(2) . . . . ?
C1 C6 C7 N2 -0.7(2) . . . . ?
C1 C6 C7 C8 179.19(16) . . . . ?
C5 C6 C7 N2 179.91(14) . . . . ?
C5 C6 C7 C8 -0.2(2) . . . . ?
C13 N2 C7 C6 -116.95(17) . . . . ?
C13 N2 C7 C8 63.2(2) . . . . ?
C14 N2 C7 C6 116.26(17) . . . . ?
C14 N2 C7 C8 -63.6(2) . . . . ?
N2 C7 C8 C9 -178.99(16) . . . . ?
C6 C7 C8 C9 1.2(3) . . . . ?
C7 C8 C9 C10 -0.6(3) . . . . ?
C8 C9 C10 C5 -0.9(3) . . . . ?
C4 C5 C10 C9 -177.38(18) . . . . ?
C6 C5 C10 C9 1.8(3) . . . . ?
C16 N3 C15 O1 -177.67(17) . . . . ?
C16 N3 C15 C18 1.7(3) . . . . ?
C17 N4 C16 O2 -176.05(16) . . . . ?
C17 N4 C16 N3 2.8(2) . . . . ?
C15 N3 C16 O2 176.17(16) . . . . ?
C15 N3 C16 N4 -2.6(3) . . . . ?
C16 N4 C17 O3 177.37(15) . . . . ?
C16 N4 C17 C18 -2.0(2) . . . . ?
O4 N5 C18 C15 179.75(16) . . . . ?
O4 N5 C18 C17 -0.6(3) . . . . ?
O4' N5 C18 C15 -14.9(8) . . . . ?
O4' N5 C18 C17 164.7(8) . . . . ?
O3 C17 C18 N5 2.0(3) . . . . ?
O3 C17 C18 C15 -178.43(16) . . . . ?
N4 C17 C18 N5 -178.75(15) . . . . ?
N4 C17 C18 C15 0.8(2) . . . . ?
O1 C15 C18 N5 -1.8(3) . . . . ?
O1 C15 C18 C17 178.59(17) . . . . ?
N3 C15 C18 N5 178.91(15) . . . . ?
N3 C15 C18 C17 -0.7(2) . . . . ?

loop_
 _geom_hbond_atom_site_label_D
 _geom_hbond_atom_site_label_H
 _geom_hbond_atom_site_label_A
 _geom_hbond_distance_DH
 _geom_hbond_distance_HA
 _geom_hbond_distance_DA
 _geom_hbond_angle_DHA
 _geom_hbond_site_symmetry_A
N2 H2N N1  1.18(2) 1.47(2) 2.596(2) 158.5(19) .
N3 H3N O2  0.83(2) 2.00(2) 2.816(2) 170.5(19) 3_576
N4 H4N O3  0.87(2) 1.95(2) 2.821(2) 176.0(17) 3_676
O5 H5O N5  0.84 2.21 2.990(2) 154.8 .
O5 H5O O1  0.84 2.54 3.177(2) 133.8 .
O5' H5O' O1  0.84 1.84 2.494(9) 133.5 .
C11 H11B O4  0.98 2.54 3.268(3) 130.7 2_645
C12 H12B O4  0.98 2.59 3.278(2) 127.1 2_645
C14 H14B O3  0.98 2.56 3.401(2) 143.6 2_645
C19 H19A O1  0.98 2.53 3.110(3) 117.7 .

_diffrn_measured_fraction_theta_max    0.992
_diffrn_reflns_theta_full              25.00
_diffrn_measured_fraction_theta_full   0.992
_refine_diff_density_max    0.225
_refine_diff_density_min   -0.235
_refine_diff_density_rms    0.040

#===END


data_2

#LOCAL NAME GSN107

_audit_creation_method            SHELXL-97
_chemical_name_systematic
;
1-dimethylammonium,8-dimethylaminonaphthalene cyanurate cyanuric 
acid dihydrate
;
_chemical_name_common             ?
_chemical_melting_point           ?
_chemical_formula_moiety
'C14 H19 N2 +, C3 H2 N3 O3 -, C3 H3 N3 O3, 2 H2 O'
_chemical_formula_sum
 'C20 H28 N8 O8'
_chemical_formula_weight          508.50

loop_
 _atom_type_symbol
 _atom_type_description
 _atom_type_scat_dispersion_real
 _atom_type_scat_dispersion_imag
 _atom_type_scat_source
 'C'  'C'   0.0033   0.0016
 'International Tables Vol C Tables 4.2.6.8 and 6.1.1.4'
 'H'  'H'   0.0000   0.0000
 'International Tables Vol C Tables 4.2.6.8 and 6.1.1.4'
 'N'  'N'   0.0061   0.0033
 'International Tables Vol C Tables 4.2.6.8 and 6.1.1.4'
 'O'  'O'   0.0106   0.0060
 'International Tables Vol C Tables 4.2.6.8 and 6.1.1.4'

_symmetry_cell_setting            triclinic
_symmetry_space_group_name_H-M    'P -1'
_symmetry_space_group_name_Hall   '-P 1'

loop_
 _symmetry_equiv_pos_as_xyz
 'x, y, z'
 '-x, -y, -z'

_cell_length_a                    11.793(2)
_cell_length_b                    14.279(2)
_cell_length_c                    15.905(4)
_cell_angle_alpha                 105.711(4)
_cell_angle_beta                  105.035(4)
_cell_angle_gamma                 104.019(3)
_cell_volume                      2345.1(8)
_cell_formula_units_Z             4
_cell_measurement_temperature     120(2)
_cell_measurement_reflns_used     1653
_cell_measurement_theta_min       2.34
_cell_measurement_theta_max       24.4

_exptl_crystal_description        needle
_exptl_crystal_colour             colourless
_exptl_crystal_size_max           0.08
_exptl_crystal_size_mid           0.01
_exptl_crystal_size_min           0.01
_exptl_crystal_density_meas       ?
_exptl_crystal_density_diffrn     1.440
_exptl_crystal_density_method     'not measured'
_exptl_crystal_F_000              1072
_exptl_absorpt_coefficient_mu     0.113
_exptl_absorpt_correction_type    multi-scan
_exptl_absorpt_correction_T_min   0.9910
_exptl_absorpt_correction_T_max   0.9989
_exptl_absorpt_process_details    'SADABS; Sheldrick, 2003'

_exptl_special_details
;
 ?
;

_diffrn_ambient_temperature       120(2)
_diffrn_radiation_wavelength      0.67510
_diffrn_radiation_type            synchrotron
_diffrn_radiation_source          'Daresbury SRS station 9.8'
_diffrn_radiation_monochromator   'silicon 111'
_diffrn_measurement_device_type   'Bruker APEX2 CCD diffractometer'
_diffrn_measurement_method        'thin-slice \w scans'
_diffrn_detector_area_resol_mean  ?
_diffrn_standards_number          0
_diffrn_standards_interval_count  ?
_diffrn_standards_interval_time   ?
_diffrn_standards_decay_%         10
_diffrn_reflns_number             18324
_diffrn_reflns_av_R_equivalents   0.0738
_diffrn_reflns_av_sigmaI/netI     0.1195
_diffrn_reflns_limit_h_min        -14
_diffrn_reflns_limit_h_max        14
_diffrn_reflns_limit_k_min        -17
_diffrn_reflns_limit_k_max        17
_diffrn_reflns_limit_l_min        -19
_diffrn_reflns_limit_l_max        19
_diffrn_reflns_theta_min          1.92
_diffrn_reflns_theta_max          24.00
_reflns_number_total              8540
_reflns_number_gt                 4261
_reflns_threshold_expression      I>2\s(I)

_computing_data_collection        'Bruker APEX2'
_computing_cell_refinement        'Bruker SAINT'
_computing_data_reduction         'Bruker SAINT'
_computing_structure_solution     SIR2002
_computing_structure_refinement   'Bruker SHELXTL'
_computing_molecular_graphics     'Bruker SHELXTL'
_computing_publication_material   'Bruker SHELXTL and local programs'

_refine_special_details
;
 Refinement of F^2^ against ALL reflections.  The weighted R-factor wR and
 goodness of fit S are based on F^2^, conventional R-factors R are based
 on F, with F set to zero for negative F^2^. The threshold expression of
 F^2^ > 2sigma(F^2^) is used only for calculating R-factors(gt) etc. and is
 not relevant to the choice of reflections for refinement.  R-factors based
 on F^2^ are statistically about twice as large as those based on F, and R-
 factors based on ALL data will be even larger.
;

_refine_ls_structure_factor_coef  Fsqd
_refine_ls_matrix_type            full
_refine_ls_weighting_scheme       calc
_refine_ls_weighting_details
 'calc w=1/[\s^2^(Fo^2^)+(0.0691P)^2^+0.0000P] where P=(Fo^2^+2Fc^2^)/3'
_atom_sites_solution_primary      direct
_atom_sites_solution_secondary    difmap
_atom_sites_solution_hydrogens    difmap
_refine_ls_hydrogen_treatment     mixed
_refine_ls_extinction_method      SHELXL
_refine_ls_extinction_coef        0.01329(12)
_refine_ls_number_reflns          8540
_refine_ls_number_parameters      719
_refine_ls_number_restraints      22
_refine_ls_R_factor_all           0.1381
_refine_ls_R_factor_gt            0.0578
_refine_ls_wR_factor_ref          0.1564
_refine_ls_wR_factor_gt           0.1228
_refine_ls_goodness_of_fit_ref    0.940
_refine_ls_restrained_S_all       0.940
_refine_ls_shift/su_max           0.000
_refine_ls_shift/su_mean          0.000

loop_
 _atom_site_label
 _atom_site_type_symbol
 _atom_site_fract_x
 _atom_site_fract_y
 _atom_site_fract_z
 _atom_site_U_iso_or_equiv
 _atom_site_adp_type
 _atom_site_occupancy
 _atom_site_symmetry_multiplicity
 _atom_site_calc_flag
 _atom_site_refinement_flags
 _atom_site_disorder_assembly
 _atom_site_disorder_group
N1 N 1.1607(3) 0.2659(2) 0.1058(2) 0.0244(7) Uani 1 1 d . . .
H1N H 1.068(4) 0.279(3) 0.110(3) 0.053(13) Uiso 1 1 d . . .
N2 N 0.9448(3) 0.2581(2) 0.1176(2) 0.0234(7) Uani 1 1 d . . .
C1 C 1.1425(3) 0.1656(3) 0.1185(3) 0.0272(9) Uani 1 1 d . . .
C2 C 1.2295(4) 0.1185(3) 0.1153(3) 0.0420(12) Uani 1 1 d . . .
H2 H 1.2988 0.1474 0.0993 0.050 Uiso 1 1 calc R . .
C3 C 1.2176(4) 0.0276(3) 0.1354(4) 0.0493(13) Uani 1 1 d . . .
H3 H 1.2794 -0.0043 0.1335 0.059 Uiso 1 1 calc R . .
C4 C 1.1184(4) -0.0154(3) 0.1575(3) 0.0360(11) Uani 1 1 d . . .
H4 H 1.1124 -0.0761 0.1722 0.043 Uiso 1 1 calc R . .
C5 C 1.0241(3) 0.0297(3) 0.1587(3) 0.0250(9) Uani 1 1 d . . .
C6 C 1.0342(3) 0.1217(3) 0.1375(3) 0.0222(9) Uani 1 1 d . . .
C7 C 0.9365(3) 0.1640(3) 0.1390(3) 0.0249(9) Uani 1 1 d . . .
C8 C 0.8377(4) 0.1173(3) 0.1599(3) 0.0408(12) Uani 1 1 d . . .
H8 H 0.7737 0.1466 0.1609 0.049 Uiso 1 1 calc R . .
C9 C 0.8291(4) 0.0269(3) 0.1799(3) 0.0401(11) Uani 1 1 d . . .
H9 H 0.7586 -0.0049 0.1933 0.048 Uiso 1 1 calc R . .
C10 C 0.9203(4) -0.0163(3) 0.1805(3) 0.0325(10) Uani 1 1 d . . .
H10 H 0.9143 -0.0770 0.1955 0.039 Uiso 1 1 calc R . .
C11 C 1.2628(4) 0.3481(3) 0.1873(3) 0.0319(10) Uani 1 1 d . . .
H11A H 1.2435 0.3501 0.2439 0.048 Uiso 1 1 calc R . .
H11B H 1.2715 0.4149 0.1794 0.048 Uiso 1 1 calc R . .
H11C H 1.3409 0.3336 0.1925 0.048 Uiso 1 1 calc R . .
C12 C 1.1794(4) 0.2663(3) 0.0171(3) 0.0304(10) Uani 1 1 d . . .
H12A H 1.2569 0.2529 0.0165 0.046 Uiso 1 1 calc R . .
H12B H 1.1844 0.3338 0.0116 0.046 Uiso 1 1 calc R . .
H12C H 1.1091 0.2124 -0.0353 0.046 Uiso 1 1 calc R . .
C13 C 0.9409(4) 0.3427(3) 0.1943(3) 0.0353(11) Uani 1 1 d . . .
H13A H 0.8575 0.3252 0.1987 0.053 Uiso 1 1 calc R . .
H13B H 0.9601 0.4071 0.1816 0.053 Uiso 1 1 calc R . .
H13C H 1.0025 0.3516 0.2532 0.053 Uiso 1 1 calc R . .
C14 C 0.8499(4) 0.2421(3) 0.0283(3) 0.0369(11) Uani 1 1 d . . .
H14A H 0.8573 0.1898 -0.0225 0.055 Uiso 1 1 calc R . .
H14B H 0.8633 0.3072 0.0168 0.055 Uiso 1 1 calc R . .
H14C H 0.7665 0.2187 0.0317 0.055 Uiso 1 1 calc R . .
N3 N 0.9599(3) 0.8354(2) 0.4709(2) 0.0257(8) Uani 1 1 d . . .
N4 N 0.7360(3) 0.8352(2) 0.4780(2) 0.0240(7) Uani 1 1 d . . .
H4N H 0.831(3) 0.860(2) 0.485(2) 0.016(9) Uiso 1 1 d . . .
C15 C 0.9019(3) 0.7253(3) 0.4155(3) 0.0230(9) Uani 1 1 d . . .
C16 C 0.9724(4) 0.6686(3) 0.3862(3) 0.0266(9) Uani 1 1 d . . .
H16 H 1.0596 0.7016 0.4037 0.032 Uiso 1 1 calc R . .
C17 C 0.9192(4) 0.5631(3) 0.3312(3) 0.0269(9) Uani 1 1 d . . .
H17 H 0.9701 0.5257 0.3119 0.032 Uiso 1 1 calc R . .
C18 C 0.7943(4) 0.5145(3) 0.3055(3) 0.0244(9) Uani 1 1 d . . .
H18 H 0.7584 0.4433 0.2676 0.029 Uiso 1 1 calc R . .
C19 C 0.7172(3) 0.5690(3) 0.3346(3) 0.0225(9) Uani 1 1 d . . .
C20 C 0.7702(3) 0.6763(3) 0.3908(3) 0.0228(9) Uani 1 1 d . . .
C21 C 0.6862(3) 0.7246(3) 0.4175(3) 0.0219(9) Uani 1 1 d . . .
C22 C 0.5621(4) 0.6728(3) 0.3917(3) 0.0274(9) Uani 1 1 d . . .
H22 H 0.5097 0.7082 0.4115 0.033 Uiso 1 1 calc R . .
C23 C 0.5114(4) 0.5675(3) 0.3359(3) 0.0264(9) Uani 1 1 d . . .
H23 H 0.4247 0.5318 0.3177 0.032 Uiso 1 1 calc R . .
C24 C 0.5873(4) 0.5165(3) 0.3080(3) 0.0260(9) Uani 1 1 d . . .
H24 H 0.5528 0.4453 0.2704 0.031 Uiso 1 1 calc R . .
C25 C 1.0165(4) 0.8915(3) 0.4176(3) 0.0318(10) Uani 1 1 d . . .
H25A H 1.0853 0.8686 0.4071 0.048 Uiso 1 1 calc R . .
H25B H 1.0483 0.9659 0.4530 0.048 Uiso 1 1 calc R . .
H25C H 0.9533 0.8769 0.3575 0.048 Uiso 1 1 calc R . .
C26 C 1.0529(4) 0.8539(3) 0.5619(3) 0.0330(10) Uani 1 1 d . . .
H26A H 1.0145 0.8122 0.5935 0.050 Uiso 1 1 calc R . .
H26B H 1.0818 0.9273 0.6006 0.050 Uiso 1 1 calc R . .
H26C H 1.1239 0.8346 0.5518 0.050 Uiso 1 1 calc R . .
C27 C 0.7316(4) 0.8499(3) 0.5747(3) 0.0327(10) Uani 1 1 d . . .
H27A H 0.6446 0.8283 0.5713 0.049 Uiso 1 1 calc R . .
H27B H 0.7731 0.9229 0.6143 0.049 Uiso 1 1 calc R . .
H27C H 0.7743 0.8081 0.6012 0.049 Uiso 1 1 calc R . .
C28 C 0.6748(4) 0.8997(3) 0.4347(3) 0.0293(10) Uani 1 1 d . . .
H28A H 0.6869 0.8934 0.3750 0.044 Uiso 1 1 calc R . .
H28B H 0.7121 0.9721 0.4765 0.044 Uiso 1 1 calc R . .
H28C H 0.5854 0.8756 0.4244 0.044 Uiso 1 1 calc R . .
O1 O 0.5905(3) 0.2568(2) 0.19013(19) 0.0346(7) Uani 1 1 d . . .
O2 O 0.4694(2) -0.0927(2) 0.05547(18) 0.0296(7) Uani 1 1 d . . .
O3 O 0.5574(3) 0.0552(2) 0.36684(18) 0.0340(7) Uani 1 1 d . . .
N5 N 0.5277(3) 0.0825(3) 0.1231(2) 0.0259(8) Uani 1 1 d D . .
H5N H 0.528(4) 0.094(3) 0.076(2) 0.031 Uiso 1 1 d D . .
N6 N 0.5104(3) -0.0192(3) 0.2116(2) 0.0254(8) Uani 1 1 d D . .
H6N H 0.493(3) -0.079(2) 0.220(3) 0.030 Uiso 1 1 d D . .
N7 N 0.5807(3) 0.1640(2) 0.2860(2) 0.0256(8) Uani 1 1 d . . .
C29 C 0.5680(3) 0.1733(3) 0.2021(3) 0.0263(9) Uani 1 1 d . . .
C30 C 0.5012(3) -0.0149(3) 0.1258(3) 0.0240(9) Uani 1 1 d . . .
C31 C 0.5504(3) 0.0695(3) 0.2918(3) 0.0246(9) Uani 1 1 d . . .
O4 O 0.8364(2) 0.6582(2) 0.61527(18) 0.0276(6) Uani 1 1 d . . .
O5 O 0.4964(2) 0.3745(2) 0.43139(18) 0.0273(6) Uani 1 1 d . . .
O6 O 0.8821(2) 0.3745(2) 0.43096(18) 0.0277(6) Uani 1 1 d . . .
N8 N 0.6654(3) 0.5168(2) 0.5243(2) 0.0236(7) Uani 1 1 d D . .
H8N H 0.619(3) 0.555(3) 0.540(2) 0.028 Uiso 1 1 d D . .
N9 N 0.6884(3) 0.3708(2) 0.4325(2) 0.0234(8) Uani 1 1 d D . .
H9N H 0.658(3) 0.308(2) 0.393(2) 0.028 Uiso 1 1 d D . .
N10 N 0.8615(3) 0.5170(2) 0.5235(2) 0.0243(8) Uani 1 1 d D . .
H10N H 0.940(3) 0.551(3) 0.539(3) 0.029 Uiso 1 1 d D . .
C32 C 0.7914(3) 0.5708(3) 0.5585(3) 0.0222(9) Uani 1 1 d . . .
C33 C 0.6088(3) 0.4180(3) 0.4610(3) 0.0212(9) Uani 1 1 d . . .
C34 C 0.8150(3) 0.4178(3) 0.4607(3) 0.0222(9) Uani 1 1 d . . .
O7 O 0.0848(2) 0.4608(2) 0.07723(19) 0.0294(7) Uani 1 1 d . . .
O8 O 0.4061(2) 0.76521(19) 0.19382(18) 0.0282(6) Uani 1 1 d . . .
O9 O 0.0200(2) 0.76194(19) 0.19797(18) 0.0278(6) Uani 1 1 d . . .
N11 N 0.0527(3) 0.6120(2) 0.1397(2) 0.0241(8) Uani 1 1 d D . .
H11N H -0.026(3) 0.579(3) 0.118(3) 0.029 Uiso 1 1 d D . .
N12 N 0.2455(3) 0.6139(2) 0.1337(2) 0.0260(8) Uani 1 1 d D . .
H12N H 0.292(3) 0.579(3) 0.118(3) 0.031 Uiso 1 1 d D . .
N13 N 0.2161(3) 0.7722(2) 0.1991(2) 0.0232(7) Uani 1 1 d . . .
C35 C 0.0958(3) 0.7181(3) 0.1803(2) 0.0210(9) Uani 1 1 d . . .
C36 C 0.1241(3) 0.5549(3) 0.1131(3) 0.0228(9) Uani 1 1 d . . .
C37 C 0.2921(3) 0.7206(3) 0.1766(3) 0.0223(9) Uani 1 1 d . . .
O10 O 0.7943(2) 0.5089(2) 0.09163(18) 0.0267(6) Uani 1 1 d . . .
O11 O 0.4113(2) 0.50770(19) 0.09984(17) 0.0249(6) Uani 1 1 d . . .
O12 O 0.7377(2) 0.8109(2) 0.22883(19) 0.0297(7) Uani 1 1 d . . .
N14 N 0.6035(3) 0.5069(2) 0.0982(2) 0.0215(7) Uani 1 1 d D . .
H14N H 0.574(3) 0.439(2) 0.072(2) 0.026 Uiso 1 1 d D . .
N15 N 0.5731(3) 0.6604(2) 0.1639(2) 0.0228(8) Uani 1 1 d D . .
H15N H 0.525(3) 0.695(3) 0.175(3) 0.027 Uiso 1 1 d D . .
N16 N 0.7688(3) 0.6620(3) 0.1608(2) 0.0248(8) Uani 1 1 d D . .
H16N H 0.849(3) 0.692(3) 0.174(3) 0.030 Uiso 1 1 d D . .
C38 C 0.7269(3) 0.5565(3) 0.1149(3) 0.0230(9) Uani 1 1 d . . .
C39 C 0.5219(4) 0.5555(3) 0.1198(3) 0.0209(9) Uani 1 1 d . . .
C40 C 0.6960(4) 0.7182(3) 0.1878(3) 0.0238(9) Uani 1 1 d . . .
O13 O 0.3282(3) 0.9344(2) 0.3694(2) 0.0364(7) Uani 1 1 d D . .
H1O H 0.293(3) 0.894(3) 0.3120(19) 0.044 Uiso 1 1 d D . .
H2O H 0.397(3) 0.970(3) 0.375(3) 0.044 Uiso 1 1 d D . .
O14 O 0.5067(3) 0.2926(2) 0.0275(2) 0.0370(7) Uani 1 1 d D . .
H3O H 0.538(4) 0.282(3) 0.079(2) 0.044 Uiso 1 1 d D . .
H4O H 0.511(4) 0.245(3) -0.013(2) 0.044 Uiso 1 1 d D . .
O15 O 0.7727(3) 0.4061(3) 0.6551(2) 0.0484(9) Uani 1 1 d D . .
H5O H 0.735(4) 0.339(2) 0.618(3) 0.058 Uiso 1 1 d D . .
H6O H 0.786(4) 0.401(3) 0.708(2) 0.058 Uiso 1 1 d D . .
O16 O 0.6488(4) 0.2048(3) 0.5438(2) 0.0579(10) Uani 1 1 d D . .
H7O H 0.663(5) 0.162(3) 0.570(3) 0.069 Uiso 1 1 d D . .
H8O H 0.622(5) 0.169(3) 0.4869(18) 0.069 Uiso 1 1 d D . .

loop_
 _atom_site_aniso_label
 _atom_site_aniso_U_11
 _atom_site_aniso_U_22
 _atom_site_aniso_U_33
 _atom_site_aniso_U_23
 _atom_site_aniso_U_13
 _atom_site_aniso_U_12
N1 0.0224(18) 0.0269(19) 0.0273(19) 0.0079(15) 0.0156(16) 0.0088(15)
N2 0.0235(18) 0.0258(18) 0.0247(18) 0.0063(15) 0.0138(15) 0.0119(15)
C1 0.020(2) 0.030(2) 0.033(2) 0.011(2) 0.0119(19) 0.0082(19)
C2 0.029(3) 0.036(3) 0.076(4) 0.026(3) 0.031(3) 0.017(2)
C3 0.030(3) 0.038(3) 0.090(4) 0.024(3) 0.025(3) 0.021(2)
C4 0.031(3) 0.029(2) 0.051(3) 0.017(2) 0.012(2) 0.014(2)
C5 0.023(2) 0.026(2) 0.025(2) 0.0061(18) 0.0105(18) 0.0075(18)
C6 0.019(2) 0.024(2) 0.022(2) 0.0042(17) 0.0093(17) 0.0072(17)
C7 0.022(2) 0.027(2) 0.030(2) 0.0090(19) 0.0142(19) 0.0113(18)
C8 0.035(3) 0.045(3) 0.064(3) 0.026(3) 0.036(2) 0.023(2)
C9 0.039(3) 0.039(3) 0.055(3) 0.020(2) 0.033(2) 0.014(2)
C10 0.035(3) 0.029(2) 0.035(3) 0.012(2) 0.017(2) 0.009(2)
C11 0.031(2) 0.029(2) 0.030(2) 0.007(2) 0.010(2) 0.005(2)
C12 0.028(2) 0.039(3) 0.028(2) 0.011(2) 0.0147(19) 0.015(2)
C13 0.043(3) 0.037(3) 0.040(3) 0.013(2) 0.029(2) 0.023(2)
C14 0.028(2) 0.044(3) 0.035(3) 0.012(2) 0.008(2) 0.011(2)
N3 0.0245(19) 0.0255(19) 0.0278(19) 0.0068(15) 0.0145(16) 0.0069(15)
N4 0.0235(19) 0.0247(19) 0.0256(19) 0.0060(15) 0.0136(16) 0.0091(16)
C15 0.024(2) 0.024(2) 0.025(2) 0.0088(18) 0.0120(18) 0.0099(18)
C16 0.023(2) 0.031(2) 0.027(2) 0.0091(19) 0.0110(19) 0.0107(19)
C17 0.031(2) 0.031(2) 0.022(2) 0.0061(19) 0.0156(19) 0.016(2)
C18 0.033(2) 0.023(2) 0.019(2) 0.0065(18) 0.0106(19) 0.0118(19)
C19 0.025(2) 0.021(2) 0.020(2) 0.0061(17) 0.0081(18) 0.0054(18)
C20 0.026(2) 0.026(2) 0.021(2) 0.0093(18) 0.0118(18) 0.0094(18)
C21 0.025(2) 0.019(2) 0.020(2) 0.0038(17) 0.0092(18) 0.0074(18)
C22 0.026(2) 0.029(2) 0.024(2) 0.0035(19) 0.0128(19) 0.0083(19)
C23 0.024(2) 0.033(2) 0.022(2) 0.0092(19) 0.0114(18) 0.0062(19)
C24 0.029(2) 0.025(2) 0.021(2) 0.0072(18) 0.0085(19) 0.0060(19)
C25 0.033(2) 0.027(2) 0.038(3) 0.007(2) 0.021(2) 0.010(2)
C26 0.031(2) 0.034(3) 0.025(2) 0.003(2) 0.005(2) 0.011(2)
C27 0.041(3) 0.034(3) 0.025(2) 0.007(2) 0.017(2) 0.014(2)
C28 0.030(2) 0.033(2) 0.032(2) 0.013(2) 0.016(2) 0.016(2)
O1 0.0492(19) 0.0230(16) 0.0340(17) 0.0097(14) 0.0205(15) 0.0099(14)
O2 0.0358(17) 0.0270(16) 0.0242(15) 0.0019(13) 0.0155(13) 0.0102(13)
O3 0.0425(18) 0.0369(17) 0.0229(16) 0.0096(14) 0.0142(14) 0.0116(15)
N5 0.0291(19) 0.028(2) 0.0209(19) 0.0074(16) 0.0114(16) 0.0085(16)
N6 0.0263(19) 0.027(2) 0.0238(19) 0.0084(16) 0.0103(15) 0.0087(16)
N7 0.0269(19) 0.0261(19) 0.0255(19) 0.0086(15) 0.0126(15) 0.0088(15)
C29 0.018(2) 0.029(2) 0.027(2) 0.002(2) 0.0093(18) 0.0074(19)
C30 0.018(2) 0.030(2) 0.028(2) 0.009(2) 0.0138(18) 0.0095(18)
C31 0.020(2) 0.030(2) 0.024(2) 0.0052(19) 0.0132(18) 0.0108(18)
O4 0.0270(16) 0.0288(17) 0.0258(15) 0.0039(14) 0.0119(13) 0.0108(13)
O5 0.0222(16) 0.0297(16) 0.0311(16) 0.0077(13) 0.0135(13) 0.0097(13)
O6 0.0234(15) 0.0315(16) 0.0333(16) 0.0084(13) 0.0169(13) 0.0141(13)
N8 0.0228(19) 0.0248(19) 0.0286(19) 0.0077(16) 0.0147(16) 0.0129(15)
N9 0.0225(19) 0.0225(18) 0.026(2) 0.0056(15) 0.0124(16) 0.0089(16)
N10 0.0168(17) 0.027(2) 0.0271(19) 0.0042(16) 0.0105(16) 0.0077(15)
C32 0.020(2) 0.029(2) 0.019(2) 0.0078(19) 0.0104(18) 0.0076(18)
C33 0.018(2) 0.029(2) 0.024(2) 0.0112(19) 0.0121(18) 0.0127(19)
C34 0.023(2) 0.025(2) 0.021(2) 0.0084(18) 0.0092(18) 0.0102(19)
O7 0.0265(16) 0.0267(17) 0.0382(17) 0.0085(14) 0.0180(14) 0.0106(13)
O8 0.0219(15) 0.0280(16) 0.0381(17) 0.0094(13) 0.0171(13) 0.0100(13)
O9 0.0267(15) 0.0306(16) 0.0326(16) 0.0086(13) 0.0179(13) 0.0153(13)
N11 0.0181(17) 0.0224(19) 0.030(2) 0.0027(16) 0.0119(16) 0.0065(15)
N12 0.0182(19) 0.026(2) 0.035(2) 0.0065(16) 0.0148(16) 0.0089(15)
N13 0.0221(18) 0.0276(19) 0.0275(19) 0.0097(15) 0.0158(16) 0.0136(15)
C35 0.023(2) 0.026(2) 0.019(2) 0.0086(18) 0.0134(18) 0.0102(19)
C36 0.022(2) 0.027(2) 0.025(2) 0.0087(19) 0.0132(18) 0.0119(19)
C37 0.023(2) 0.023(2) 0.023(2) 0.0085(18) 0.0105(18) 0.0094(18)
O10 0.0239(15) 0.0315(16) 0.0292(16) 0.0071(13) 0.0159(13) 0.0138(13)
O11 0.0203(15) 0.0306(16) 0.0276(15) 0.0092(13) 0.0147(13) 0.0097(13)
O12 0.0307(16) 0.0275(17) 0.0363(17) 0.0096(14) 0.0200(14) 0.0121(14)
N14 0.0202(18) 0.0220(17) 0.0232(18) 0.0065(15) 0.0115(15) 0.0063(15)
N15 0.0190(18) 0.029(2) 0.0277(19) 0.0108(16) 0.0148(15) 0.0137(16)
N16 0.0163(17) 0.029(2) 0.0303(19) 0.0091(16) 0.0116(16) 0.0069(16)
C38 0.020(2) 0.028(2) 0.021(2) 0.0080(18) 0.0082(18) 0.0060(19)
C39 0.023(2) 0.024(2) 0.020(2) 0.0082(18) 0.0110(18) 0.0109(19)
C40 0.026(2) 0.031(3) 0.022(2) 0.012(2) 0.0155(19) 0.013(2)
O13 0.044(2) 0.0333(19) 0.0297(17) 0.0039(14) 0.0193(16) 0.0103(16)
O14 0.047(2) 0.0332(18) 0.0341(18) 0.0083(15) 0.0158(17) 0.0207(16)
O15 0.051(2) 0.057(2) 0.040(2) 0.0186(18) 0.0185(19) 0.0170(19)
O16 0.099(3) 0.045(2) 0.0306(19) 0.0137(17) 0.022(2) 0.026(2)

_geom_special_details
;
 All esds (except the esd in the dihedral angle between two l.s. planes)
 are estimated using the full covariance matrix.  The cell esds are taken
 into account individually in the estimation of esds in distances, angles
 and torsion angles; correlations between esds in cell parameters are only
 used when they are defined by crystal symmetry.  An approximate (isotropic)
 treatment of cell esds is used for estimating esds involving l.s. planes.
;

loop_
 _geom_bond_atom_site_label_1
 _geom_bond_atom_site_label_2
 _geom_bond_distance
 _geom_bond_site_symmetry_2
 _geom_bond_publ_flag
N1 H1N 1.17(4) . ?
N1 C1 1.473(5) . ?
N1 C11 1.479(5) . ?
N1 C12 1.483(5) . ?
N2 H1N 1.46(4) . ?
N2 C7 1.461(5) . ?
N2 C13 1.485(5) . ?
N2 C14 1.482(5) . ?
C1 C2 1.360(5) . ?
C1 C6 1.425(5) . ?
C2 H2 0.9500 . ?
C2 C3 1.403(6) . ?
C3 H3 0.9500 . ?
C3 C4 1.360(6) . ?
C4 H4 0.9500 . ?
C4 C5 1.415(5) . ?
C5 C6 1.427(5) . ?
C5 C10 1.416(5) . ?
C6 C7 1.427(5) . ?
C7 C8 1.363(5) . ?
C8 H8 0.9500 . ?
C8 C9 1.398(6) . ?
C9 H9 0.9500 . ?
C9 C10 1.363(5) . ?
C10 H10 0.9500 . ?
C11 H11A 0.9800 . ?
C11 H11B 0.9800 . ?
C11 H11C 0.9800 . ?
C12 H12A 0.9800 . ?
C12 H12B 0.9800 . ?
C12 H12C 0.9800 . ?
C13 H13A 0.9800 . ?
C13 H13B 0.9800 . ?
C13 H13C 0.9800 . ?
C14 H14A 0.9800 . ?
C14 H14B 0.9800 . ?
C14 H14C 0.9800 . ?
N3 C15 1.459(5) . ?
N3 C25 1.486(5) . ?
N3 C26 1.481(5) . ?
N4 H4N 1.05(3) . ?
N4 C21 1.483(5) . ?
N4 C27 1.511(5) . ?
N4 C28 1.500(5) . ?
C15 C16 1.374(5) . ?
C15 C20 1.437(5) . ?
C16 H16 0.9500 . ?
C16 C17 1.404(5) . ?
C17 H17 0.9500 . ?
C17 C18 1.363(5) . ?
C18 H18 0.9500 . ?
C18 C19 1.419(5) . ?
C19 C20 1.429(5) . ?
C19 C24 1.422(5) . ?
C20 C21 1.424(5) . ?
C21 C22 1.362(5) . ?
C22 H22 0.9500 . ?
C22 C23 1.404(5) . ?
C23 H23 0.9500 . ?
C23 C24 1.370(5) . ?
C24 H24 0.9500 . ?
C25 H25A 0.9800 . ?
C25 H25B 0.9800 . ?
C25 H25C 0.9800 . ?
C26 H26A 0.9800 . ?
C26 H26B 0.9800 . ?
C26 H26C 0.9800 . ?
C27 H27A 0.9800 . ?
C27 H27B 0.9800 . ?
C27 H27C 0.9800 . ?
C28 H28A 0.9800 . ?
C28 H28B 0.9800 . ?
C28 H28C 0.9800 . ?
O1 C29 1.236(4) . ?
O2 C30 1.239(4) . ?
O3 C31 1.250(4) . ?
N5 H5N 0.82(3) . ?
N5 C29 1.412(5) . ?
N5 C30 1.364(5) . ?
N6 H6N 0.88(3) . ?
N6 C30 1.360(5) . ?
N6 C31 1.405(5) . ?
N7 C29 1.349(5) . ?
N7 C31 1.345(5) . ?
O4 C32 1.214(4) . ?
O5 C33 1.218(4) . ?
O6 C34 1.227(4) . ?
N8 H8N 0.90(3) . ?
N8 C32 1.378(5) . ?
N8 C33 1.370(5) . ?
N9 H9N 0.87(3) . ?
N9 C33 1.379(4) . ?
N9 C34 1.373(5) . ?
N10 H10N 0.87(3) . ?
N10 C32 1.378(4) . ?
N10 C34 1.371(5) . ?
O7 C36 1.221(4) . ?
O8 C37 1.260(4) . ?
O9 C35 1.256(4) . ?
N11 H11N 0.86(3) . ?
N11 C35 1.378(5) . ?
N11 C36 1.372(4) . ?
N12 H12N 0.86(3) . ?
N12 C36 1.375(5) . ?
N12 C37 1.387(5) . ?
N13 C35 1.349(5) . ?
N13 C37 1.349(4) . ?
O10 C38 1.228(4) . ?
O11 C39 1.227(4) . ?
O12 C40 1.212(4) . ?
N14 H14N 0.89(3) . ?
N14 C38 1.374(5) . ?
N14 C39 1.375(4) . ?
N15 H15N 0.86(3) . ?
N15 C39 1.369(5) . ?
N15 C40 1.375(5) . ?
N16 H16N 0.88(3) . ?
N16 C38 1.380(5) . ?
N16 C40 1.380(4) . ?
O13 H1O 0.86(2) . ?
O13 H2O 0.81(2) . ?
O14 H3O 0.87(2) . ?
O14 H4O 0.82(2) . ?
O15 H5O 0.91(3) . ?
O15 H6O 0.84(3) . ?
O16 H7O 0.85(3) . ?
O16 H8O 0.84(3) . ?

loop_
 _geom_angle_atom_site_label_1
 _geom_angle_atom_site_label_2
 _geom_angle_atom_site_label_3
 _geom_angle
 _geom_angle_site_symmetry_1
 _geom_angle_site_symmetry_3
 _geom_angle_publ_flag
H1N N1 C1 100(2) . . ?
H1N N1 C11 106(2) . . ?
H1N N1 C12 113(2) . . ?
C1 N1 C11 110.1(3) . . ?
C1 N1 C12 114.3(3) . . ?
C11 N1 C12 111.6(3) . . ?
H1N N2 C7 98.2(16) . . ?
H1N N2 C13 111.5(16) . . ?
H1N N2 C14 110.7(16) . . ?
C7 N2 C13 112.2(3) . . ?
C7 N2 C14 113.7(3) . . ?
C13 N2 C14 110.1(3) . . ?
N1 C1 C2 120.4(3) . . ?
N1 C1 C6 118.2(3) . . ?
C2 C1 C6 121.3(4) . . ?
C1 C2 H2 119.8 . . ?
C1 C2 C3 120.4(4) . . ?
H2 C2 C3 119.8 . . ?
C2 C3 H3 119.7 . . ?
C2 C3 C4 120.5(4) . . ?
H3 C3 C4 119.7 . . ?
C3 C4 H4 119.7 . . ?
C3 C4 C5 120.6(4) . . ?
H4 C4 C5 119.7 . . ?
C4 C5 C6 119.6(3) . . ?
C4 C5 C10 120.2(4) . . ?
C6 C5 C10 120.2(3) . . ?
C1 C6 C5 117.5(3) . . ?
C1 C6 C7 125.0(3) . . ?
C5 C6 C7 117.6(3) . . ?
N2 C7 C6 118.5(3) . . ?
N2 C7 C8 120.9(3) . . ?
C6 C7 C8 120.6(4) . . ?
C7 C8 H8 119.5 . . ?
C7 C8 C9 121.1(4) . . ?
H8 C8 C9 119.5 . . ?
C8 C9 H9 119.6 . . ?
C8 C9 C10 120.9(4) . . ?
H9 C9 C10 119.6 . . ?
C5 C10 C9 119.7(4) . . ?
C5 C10 H10 120.2 . . ?
C9 C10 H10 120.2 . . ?
N1 C11 H11A 109.5 . . ?
N1 C11 H11B 109.5 . . ?
N1 C11 H11C 109.5 . . ?
H11A C11 H11B 109.5 . . ?
H11A C11 H11C 109.5 . . ?
H11B C11 H11C 109.5 . . ?
N1 C12 H12A 109.5 . . ?
N1 C12 H12B 109.5 . . ?
N1 C12 H12C 109.5 . . ?
H12A C12 H12B 109.5 . . ?
H12A C12 H12C 109.5 . . ?
H12B C12 H12C 109.5 . . ?
N2 C13 H13A 109.5 . . ?
N2 C13 H13B 109.5 . . ?
N2 C13 H13C 109.5 . . ?
H13A C13 H13B 109.5 . . ?
H13A C13 H13C 109.5 . . ?
H13B C13 H13C 109.5 . . ?
N2 C14 H14A 109.5 . . ?
N2 C14 H14B 109.5 . . ?
N2 C14 H14C 109.5 . . ?
H14A C14 H14B 109.5 . . ?
H14A C14 H14C 109.5 . . ?
H14B C14 H14C 109.5 . . ?
C15 N3 C25 110.2(3) . . ?
C15 N3 C26 111.6(3) . . ?
C25 N3 C26 111.3(3) . . ?
H4N N4 C21 105.4(18) . . ?
H4N N4 C27 107.0(18) . . ?
H4N N4 C28 107.5(17) . . ?
C21 N4 C27 112.0(3) . . ?
C21 N4 C28 112.5(3) . . ?
C27 N4 C28 111.9(3) . . ?
N3 C15 C16 120.4(3) . . ?
N3 C15 C20 119.8(3) . . ?
C16 C15 C20 119.8(4) . . ?
C15 C16 H16 119.1 . . ?
C15 C16 C17 121.9(4) . . ?
H16 C16 C17 119.1 . . ?
C16 C17 H17 120.1 . . ?
C16 C17 C18 119.8(4) . . ?
H17 C17 C18 120.1 . . ?
C17 C18 H18 119.6 . . ?
C17 C18 C19 120.8(4) . . ?
H18 C18 C19 119.6 . . ?
C18 C19 C20 120.0(3) . . ?
C18 C19 C24 119.9(3) . . ?
C20 C19 C24 120.2(3) . . ?
C15 C20 C19 117.8(3) . . ?
C15 C20 C21 126.1(3) . . ?
C19 C20 C21 116.2(3) . . ?
N4 C21 C20 118.8(3) . . ?
N4 C21 C22 118.4(3) . . ?
C20 C21 C22 122.8(3) . . ?
C21 C22 H22 119.9 . . ?
C21 C22 C23 120.3(4) . . ?
H22 C22 C23 119.9 . . ?
C22 C23 H23 120.1 . . ?
C22 C23 C24 119.8(4) . . ?
H23 C23 C24 120.1 . . ?
C19 C24 C23 120.8(4) . . ?
C19 C24 H24 119.6 . . ?
C23 C24 H24 119.6 . . ?
N3 C25 H25A 109.5 . . ?
N3 C25 H25B 109.5 . . ?
N3 C25 H25C 109.5 . . ?
H25A C25 H25B 109.5 . . ?
H25A C25 H25C 109.5 . . ?
H25B C25 H25C 109.5 . . ?
N3 C26 H26A 109.5 . . ?
N3 C26 H26B 109.5 . . ?
N3 C26 H26C 109.5 . . ?
H26A C26 H26B 109.5 . . ?
H26A C26 H26C 109.5 . . ?
H26B C26 H26C 109.5 . . ?
N4 C27 H27A 109.5 . . ?
N4 C27 H27B 109.5 . . ?
N4 C27 H27C 109.5 . . ?
H27A C27 H27B 109.5 . . ?
H27A C27 H27C 109.5 . . ?
H27B C27 H27C 109.5 . . ?
N4 C28 H28A 109.5 . . ?
N4 C28 H28B 109.5 . . ?
N4 C28 H28C 109.5 . . ?
H28A C28 H28B 109.5 . . ?
H28A C28 H28C 109.5 . . ?
H28B C28 H28C 109.5 . . ?
H5N N5 C29 113(3) . . ?
H5N N5 C30 122(3) . . ?
C29 N5 C30 124.3(3) . . ?
H6N N6 C30 121(3) . . ?
H6N N6 C31 116(3) . . ?
C30 N6 C31 122.9(3) . . ?
C29 N7 C31 119.6(3) . . ?
O1 C29 N5 117.7(4) . . ?
O1 C29 N7 123.9(4) . . ?
N5 C29 N7 118.4(4) . . ?
O2 C30 N5 122.6(4) . . ?
O2 C30 N6 123.1(4) . . ?
N5 C30 N6 114.3(3) . . ?
O3 C31 N6 116.7(4) . . ?
O3 C31 N7 123.0(4) . . ?
N6 C31 N7 120.3(3) . . ?
H8N N8 C32 114(2) . . ?
H8N N8 C33 120(2) . . ?
C32 N8 C33 125.5(3) . . ?
H9N N9 C33 119(3) . . ?
H9N N9 C34 116(3) . . ?
C33 N9 C34 124.4(3) . . ?
H10N N10 C32 117(3) . . ?
H10N N10 C34 118(3) . . ?
C32 N10 C34 125.1(3) . . ?
O4 C32 N8 122.5(3) . . ?
O4 C32 N10 123.1(4) . . ?
N8 C32 N10 114.4(3) . . ?
O5 C33 N8 122.9(3) . . ?
O5 C33 N9 122.0(4) . . ?
N8 C33 N9 115.1(3) . . ?
O6 C34 N9 122.4(3) . . ?
O6 C34 N10 122.1(3) . . ?
N9 C34 N10 115.6(3) . . ?
H11N N11 C35 120(3) . . ?
H11N N11 C36 114(3) . . ?
C35 N11 C36 124.0(3) . . ?
H12N N12 C36 114(3) . . ?
H12N N12 C37 122(3) . . ?
C36 N12 C37 123.9(3) . . ?
C35 N13 C37 118.8(3) . . ?
O9 C35 N11 118.0(3) . . ?
O9 C35 N13 121.8(3) . . ?
N11 C35 N13 120.2(3) . . ?
O7 C36 N11 123.4(3) . . ?
O7 C36 N12 123.3(3) . . ?
N11 C36 N12 113.3(3) . . ?
O8 C37 N12 117.5(3) . . ?
O8 C37 N13 122.7(3) . . ?
N12 C37 N13 119.8(3) . . ?
H14N N14 C38 119(2) . . ?
H14N N14 C39 117(2) . . ?
C38 N14 C39 124.7(3) . . ?
H15N N15 C39 119(3) . . ?
H15N N15 C40 116(3) . . ?
C39 N15 C40 125.7(3) . . ?
H16N N16 C38 114(2) . . ?
H16N N16 C40 121(2) . . ?
C38 N16 C40 124.9(3) . . ?
O10 C38 N14 121.7(4) . . ?
O10 C38 N16 123.2(3) . . ?
N14 C38 N16 115.2(3) . . ?
O11 C39 N14 122.0(3) . . ?
O11 C39 N15 123.0(3) . . ?
N14 C39 N15 115.1(3) . . ?
O12 C40 N15 123.3(3) . . ?
O12 C40 N16 122.3(4) . . ?
N15 C40 N16 114.4(3) . . ?
H1O O13 H2O 108(4) . . ?
H3O O14 H4O 103(3) . . ?
H5O O15 H6O 101(4) . . ?
H7O O16 H8O 103(4) . . ?

loop_
 _geom_torsion_atom_site_label_1
 _geom_torsion_atom_site_label_2
 _geom_torsion_atom_site_label_3
 _geom_torsion_atom_site_label_4
 _geom_torsion
 _geom_torsion_site_symmetry_1
 _geom_torsion_site_symmetry_2
 _geom_torsion_site_symmetry_3
 _geom_torsion_site_symmetry_4
 _geom_torsion_publ_flag
C11 N1 C1 C2 -70.0(5) . . . . ?
C11 N1 C1 C6 107.8(4) . . . . ?
C12 N1 C1 C2 56.7(5) . . . . ?
C12 N1 C1 C6 -125.6(4) . . . . ?
N1 C1 C2 C3 174.5(4) . . . . ?
C6 C1 C2 C3 -3.2(7) . . . . ?
C1 C2 C3 C4 0.6(7) . . . . ?
C2 C3 C4 C5 1.3(7) . . . . ?
C3 C4 C5 C6 -0.7(6) . . . . ?
C3 C4 C5 C10 179.1(4) . . . . ?
N1 C1 C6 C5 -174.0(3) . . . . ?
N1 C1 C6 C7 4.6(6) . . . . ?
C2 C1 C6 C5 3.7(6) . . . . ?
C2 C1 C6 C7 -177.7(4) . . . . ?
C4 C5 C6 C1 -1.7(5) . . . . ?
C4 C5 C6 C7 179.6(4) . . . . ?
C10 C5 C6 C1 178.4(4) . . . . ?
C10 C5 C6 C7 -0.2(5) . . . . ?
C1 C6 C7 N2 1.5(6) . . . . ?
C1 C6 C7 C8 -178.6(4) . . . . ?
C5 C6 C7 N2 -180.0(3) . . . . ?
C5 C6 C7 C8 -0.1(6) . . . . ?
C13 N2 C7 C6 -122.6(4) . . . . ?
C13 N2 C7 C8 57.5(5) . . . . ?
C14 N2 C7 C6 111.7(4) . . . . ?
C14 N2 C7 C8 -68.3(5) . . . . ?
N2 C7 C8 C9 179.6(4) . . . . ?
C6 C7 C8 C9 -0.3(7) . . . . ?
C7 C8 C9 C10 1.0(7) . . . . ?
C8 C9 C10 C5 -1.3(7) . . . . ?
C4 C5 C10 C9 -178.9(4) . . . . ?
C6 C5 C10 C9 0.9(6) . . . . ?
C25 N3 C15 C16 60.9(4) . . . . ?
C25 N3 C15 C20 -118.6(4) . . . . ?
C26 N3 C15 C16 -63.3(4) . . . . ?
C26 N3 C15 C20 117.2(4) . . . . ?
N3 C15 C16 C17 -178.6(3) . . . . ?
C20 C15 C16 C17 0.8(6) . . . . ?
C15 C16 C17 C18 0.0(6) . . . . ?
C16 C17 C18 C19 -0.7(6) . . . . ?
C17 C18 C19 C20 0.6(5) . . . . ?
C17 C18 C19 C24 -179.2(4) . . . . ?
C18 C19 C20 C15 0.2(5) . . . . ?
C18 C19 C20 C21 -179.4(3) . . . . ?
C24 C19 C20 C15 -180.0(3) . . . . ?
C24 C19 C20 C21 0.4(5) . . . . ?
N3 C15 C20 C19 178.5(3) . . . . ?
N3 C15 C20 C21 -1.9(6) . . . . ?
C16 C15 C20 C19 -0.9(5) . . . . ?
C16 C15 C20 C21 178.7(4) . . . . ?
C15 C20 C21 N4 -1.3(5) . . . . ?
C15 C20 C21 C22 -179.7(4) . . . . ?
C19 C20 C21 N4 178.3(3) . . . . ?
C19 C20 C21 C22 0.0(5) . . . . ?
C27 N4 C21 C20 -110.5(4) . . . . ?
C27 N4 C21 C22 68.0(4) . . . . ?
C28 N4 C21 C20 122.5(4) . . . . ?
C28 N4 C21 C22 -59.0(4) . . . . ?
N4 C21 C22 C23 -178.8(3) . . . . ?
C20 C21 C22 C23 -0.4(6) . . . . ?
C21 C22 C23 C24 0.4(6) . . . . ?
C22 C23 C24 C19 -0.1(6) . . . . ?
C18 C19 C24 C23 179.5(3) . . . . ?
C20 C19 C24 C23 -0.3(5) . . . . ?
C31 N7 C29 O1 178.1(4) . . . . ?
C31 N7 C29 N5 -2.5(5) . . . . ?
C30 N5 C29 O1 179.0(3) . . . . ?
C30 N5 C29 N7 -0.4(5) . . . . ?
C31 N6 C30 O2 177.8(3) . . . . ?
C31 N6 C30 N5 -3.3(5) . . . . ?
C29 N5 C30 O2 -177.9(3) . . . . ?
C29 N5 C30 N6 3.2(5) . . . . ?
C29 N7 C31 O3 -178.5(3) . . . . ?
C29 N7 C31 N6 2.4(5) . . . . ?
C30 N6 C31 O3 -178.5(3) . . . . ?
C30 N6 C31 N7 0.6(5) . . . . ?
C33 N8 C32 O4 -179.4(4) . . . . ?
C33 N8 C32 N10 0.1(5) . . . . ?
C34 N10 C32 O4 178.7(4) . . . . ?
C34 N10 C32 N8 -0.8(5) . . . . ?
C32 N8 C33 O5 -178.3(3) . . . . ?
C32 N8 C33 N9 1.5(5) . . . . ?
C34 N9 C33 O5 177.2(3) . . . . ?
C34 N9 C33 N8 -2.6(5) . . . . ?
C32 N10 C34 O6 178.9(4) . . . . ?
C32 N10 C34 N9 -0.2(5) . . . . ?
C33 N9 C34 O6 -177.1(3) . . . . ?
C33 N9 C34 N10 2.0(5) . . . . ?
C37 N13 C35 O9 -178.7(3) . . . . ?
C37 N13 C35 N11 0.7(5) . . . . ?
C36 N11 C35 O9 177.0(3) . . . . ?
C36 N11 C35 N13 -2.4(5) . . . . ?
C35 N11 C36 O7 180.0(4) . . . . ?
C35 N11 C36 N12 2.1(5) . . . . ?
C37 N12 C36 O7 -178.2(4) . . . . ?
C37 N12 C36 N11 -0.3(5) . . . . ?
C35 N13 C37 O8 -178.3(3) . . . . ?
C35 N13 C37 N12 1.0(5) . . . . ?
C36 N12 C37 O8 178.2(3) . . . . ?
C36 N12 C37 N13 -1.2(5) . . . . ?
C39 N14 C38 O10 -178.0(3) . . . . ?
C39 N14 C38 N16 3.2(5) . . . . ?
C40 N16 C38 O10 179.8(4) . . . . ?
C40 N16 C38 N14 -1.4(5) . . . . ?
C40 N15 C39 O11 -179.8(3) . . . . ?
C40 N15 C39 N14 -0.5(5) . . . . ?
C38 N14 C39 O11 177.0(3) . . . . ?
C38 N14 C39 N15 -2.3(5) . . . . ?
C39 N15 C40 O12 -178.2(4) . . . . ?
C39 N15 C40 N16 2.0(5) . . . . ?
C38 N16 C40 O12 179.2(4) . . . . ?
C38 N16 C40 N15 -1.0(5) . . . . ?

loop_
 _geom_hbond_atom_site_label_D
 _geom_hbond_atom_site_label_H
 _geom_hbond_atom_site_label_A
 _geom_hbond_distance_DH
 _geom_hbond_distance_HA
 _geom_hbond_distance_DA
 _geom_hbond_angle_DHA
 _geom_hbond_site_symmetry_A
N1 H1N N2  1.17(4) 1.46(4) 2.580(4) 159(4) .
N4 H4N N3  1.05(3) 1.70(3) 2.672(4) 151(3) .
N5 H5N O2  0.82(3) 2.09(3) 2.892(4) 168(4) 2_655
N6 H6N O8  0.88(3) 2.09(3) 2.930(4) 160(4) 1_545
N8 H8N O5  0.90(3) 1.95(3) 2.843(4) 174(3) 2_666
N9 H9N N7  0.87(3) 2.08(3) 2.948(4) 174(3) .
N10 H10N O6  0.87(3) 1.97(3) 2.838(4) 177(4) 2_766
N11 H11N O10  0.86(3) 1.99(3) 2.836(4) 169(4) 1_455
N12 H12N O11  0.86(3) 1.97(3) 2.821(4) 173(4) .
N14 H14N O14  0.89(3) 1.89(3) 2.777(4) 175(3) .
N15 H15N O8  0.86(3) 1.94(3) 2.806(4) 176(4) .
N16 H16N O9  0.88(3) 1.90(3) 2.784(4) 177(4) 1_655
O13 H1O N13  0.86(2) 1.94(3) 2.776(4) 163(4) .
O13 H2O O3  0.81(2) 2.04(3) 2.849(4) 171(4) 1_565
O14 H3O O1  0.87(2) 1.88(3) 2.750(4) 175(4) .
O14 H4O O2  0.82(2) 2.18(3) 2.917(4) 150(4) 2_655
O15 H5O O16  0.91(3) 1.81(3) 2.719(5) 176(5) .
O15 H6O N12  0.84(3) 2.70(3) 3.504(5) 162(4) 2_666
O16 H7O O13  0.85(3) 1.89(3) 2.736(5) 171(5) 2_666
O16 H8O O3  0.84(3) 1.96(3) 2.775(4) 164(5) .
C4 H4 O9  0.95 2.49 3.404(5) 160.1 1_645
C10 H10 O12  0.95 2.57 3.261(5) 129.8 1_545
C12 H12B O7  0.98 2.53 3.239(5) 129.1 1_655
C13 H13C O4  0.98 2.50 3.461(5) 168.5 2_766
C25 H25C O12  0.98 2.58 3.510(5) 159.5 .
C27 H27B O13  0.98 2.59 3.267(5) 126.3 2_676
C27 H27C O4  0.98 2.47 3.409(5) 160.4 .
C28 H28A O12  0.98 2.60 3.514(5) 156.1 .

_diffrn_measured_fraction_theta_max    0.995
_diffrn_reflns_theta_full              24.00
_diffrn_measured_fraction_theta_full   0.995
_refine_diff_density_max    0.260
_refine_diff_density_min   -0.330
_refine_diff_density_rms    0.063


# start Validation Reply Form


#===END


data_3


#LOCAL NAME GSN104

_audit_creation_method            SHELXL-97
_chemical_name_systematic
;
1-dimethylammonium,8-dimethylaminonaphthalene barbiturate 
methanol trisolvate
;
_chemical_name_common             ?
_chemical_melting_point           ?
_chemical_formula_moiety
'4 C14 H19 N2 +, 4 C4 H3 N2 O3 -, 3 C H3 O H'
_chemical_formula_sum
 'C75 H100 N16 O15'
_chemical_formula_weight          1465.71

loop_
 _atom_type_symbol
 _atom_type_description
 _atom_type_scat_dispersion_real
 _atom_type_scat_dispersion_imag
 _atom_type_scat_source
 'C'  'C'   0.0033   0.0016
 'International Tables Vol C Tables 4.2.6.8 and 6.1.1.4'
 'H'  'H'   0.0000   0.0000
 'International Tables Vol C Tables 4.2.6.8 and 6.1.1.4'
 'N'  'N'   0.0061   0.0033
 'International Tables Vol C Tables 4.2.6.8 and 6.1.1.4'
 'O'  'O'   0.0106   0.0060
 'International Tables Vol C Tables 4.2.6.8 and 6.1.1.4'

_symmetry_cell_setting            monoclinic
_symmetry_space_group_name_H-M    'P 21/c'
_symmetry_space_group_name_Hall   '-P 2ybc'

loop_
 _symmetry_equiv_pos_as_xyz
 'x, y, z'
 '-x, y+1/2, -z+1/2'
 '-x, -y, -z'
 'x, -y-1/2, z-1/2'

_cell_length_a                    11.4410(13)
_cell_length_b                    24.191(3)
_cell_length_c                    27.218(3)
_cell_angle_alpha                 90.00
_cell_angle_beta                  91.3670(16)
_cell_angle_gamma                 90.00
_cell_volume                      7531.0(15)
_cell_formula_units_Z             4
_cell_measurement_temperature     120(2)
_cell_measurement_reflns_used     7833
_cell_measurement_theta_min       2.27
_cell_measurement_theta_max       29.75

_exptl_crystal_description        rod
_exptl_crystal_colour             colourless
_exptl_crystal_size_max           0.15
_exptl_crystal_size_mid           0.01
_exptl_crystal_size_min           0.01
_exptl_crystal_density_meas       ?
_exptl_crystal_density_diffrn     1.293
_exptl_crystal_density_method     'not measured'
_exptl_crystal_F_000              3128
_exptl_absorpt_coefficient_mu     0.092
_exptl_absorpt_correction_type    multi-scan
_exptl_absorpt_correction_T_min   0.9864
_exptl_absorpt_correction_T_max   0.9991
_exptl_absorpt_process_details    'SADABS; Sheldrick, 2003'

_exptl_special_details
;
 ?
;

_diffrn_ambient_temperature       120(2)
_diffrn_radiation_wavelength      0.67510
_diffrn_radiation_type            synchrotron
_diffrn_radiation_source          'Daresbury SRS station 9.8'
_diffrn_radiation_monochromator   'silicon 111'
_diffrn_measurement_device_type   'Bruker APEX2 CCD diffractometer'
_diffrn_measurement_method        'thin-slice \w scans'
_diffrn_detector_area_resol_mean  ?
_diffrn_standards_number          0
_diffrn_standards_interval_count  ?
_diffrn_standards_interval_time   ?
_diffrn_standards_decay_%         10
_diffrn_reflns_number             67475
_diffrn_reflns_av_R_equivalents   0.0688
_diffrn_reflns_av_sigmaI/netI     0.0608
_diffrn_reflns_limit_h_min        -14
_diffrn_reflns_limit_h_max        14
_diffrn_reflns_limit_k_min        -31
_diffrn_reflns_limit_k_max        31
_diffrn_reflns_limit_l_min        -34
_diffrn_reflns_limit_l_max        35
_diffrn_reflns_theta_min          1.99
_diffrn_reflns_theta_max          26.00
_reflns_number_total              17177
_reflns_number_gt                 13112
_reflns_threshold_expression      I>2\s(I)

_computing_data_collection        'Bruker APEX2'
_computing_cell_refinement        'Bruker SAINT'
_computing_data_reduction         'Bruker SAINT'
_computing_structure_solution     SIR2002
_computing_structure_refinement   'Bruker SHELXTL'
_computing_molecular_graphics     'Bruker SHELXTL'
_computing_publication_material   'Bruker SHELXTL and local programs'

_refine_special_details
;
 Refinement of F^2^ against ALL reflections.  The weighted R-factor wR and
 goodness of fit S are based on F^2^, conventional R-factors R are based
 on F, with F set to zero for negative F^2^. The threshold expression of
 F^2^ > 2sigma(F^2^) is used only for calculating R-factors(gt) etc. and is
 not relevant to the choice of reflections for refinement.  R-factors based
 on F^2^ are statistically about twice as large as those based on F, and R-
 factors based on ALL data will be even larger.
;

_refine_ls_structure_factor_coef  Fsqd
_refine_ls_matrix_type            full
_refine_ls_weighting_scheme       calc
_refine_ls_weighting_details
 'calc w=1/[\s^2^(Fo^2^)+(0.0589P)^2^+5.1994P] where P=(Fo^2^+2Fc^2^)/3'
_atom_sites_solution_primary      direct
_atom_sites_solution_secondary    difmap
_atom_sites_solution_hydrogens    difmap
_refine_ls_hydrogen_treatment     mixed
_refine_ls_extinction_method      SHELXL
_refine_ls_extinction_coef        0.0068(9)
_refine_ls_extinction_expression
 'Fc^*^=kFc[1+0.001xFc^2^\l^3^/sin(2\q)]^-1/4^'
_refine_ls_number_reflns          17177
_refine_ls_number_parameters      1026
_refine_ls_number_restraints      0
_refine_ls_R_factor_all           0.0772
_refine_ls_R_factor_gt            0.0578
_refine_ls_wR_factor_ref          0.1558
_refine_ls_wR_factor_gt           0.1444
_refine_ls_goodness_of_fit_ref    1.069
_refine_ls_restrained_S_all       1.069
_refine_ls_shift/su_max           0.001
_refine_ls_shift/su_mean          0.000

loop_
 _atom_site_label
 _atom_site_type_symbol
 _atom_site_fract_x
 _atom_site_fract_y
 _atom_site_fract_z
 _atom_site_U_iso_or_equiv
 _atom_site_adp_type
 _atom_site_occupancy
 _atom_site_symmetry_multiplicity
 _atom_site_calc_flag
 _atom_site_refinement_flags
 _atom_site_disorder_assembly
 _atom_site_disorder_group
O1 O 0.21475(13) -0.12371(6) 0.82948(5) 0.0267(3) Uani 1 1 d . . .
O2 O 0.23559(14) -0.02109(6) 0.97111(5) 0.0271(3) Uani 1 1 d . . .
O3 O 0.26395(13) 0.07310(6) 0.82605(5) 0.0255(3) Uani 1 1 d . . .
N1 N 0.22307(15) -0.07136(7) 0.89947(6) 0.0211(3) Uani 1 1 d . . .
H1N H 0.217(2) -0.1036(10) 0.9156(9) 0.025 Uiso 1 1 d . . .
N2 N 0.25015(15) 0.02448(7) 0.89766(6) 0.0202(3) Uani 1 1 d . . .
H2N H 0.2611(19) 0.0580(10) 0.9116(8) 0.024 Uiso 1 1 d . . .
C1 C 0.22456(17) -0.07508(8) 0.84772(7) 0.0203(4) Uani 1 1 d . . .
C2 C 0.23623(16) -0.02263(8) 0.92550(7) 0.0199(4) Uani 1 1 d . . .
C3 C 0.25042(16) 0.02618(8) 0.84575(7) 0.0195(4) Uani 1 1 d . . .
C4 C 0.23636(18) -0.02544(8) 0.82144(7) 0.0225(4) Uani 1 1 d . . .
H4 H 0.234(2) -0.0274(9) 0.7866(9) 0.027 Uiso 1 1 d . . .
O4 O 0.29324(12) 0.32012(5) 0.95709(5) 0.0236(3) Uani 1 1 d . . .
O5 O 0.27176(13) 0.23085(6) 0.80846(5) 0.0269(3) Uani 1 1 d . . .
O6 O 0.29232(14) 0.12270(6) 0.94705(5) 0.0265(3) Uani 1 1 d . . .
N3 N 0.28346(14) 0.27412(7) 0.88351(6) 0.0194(3) Uani 1 1 d . . .
H3N H 0.2876(19) 0.3086(10) 0.8706(8) 0.023 Uiso 1 1 d . . .
N4 N 0.27666(14) 0.17750(7) 0.87827(6) 0.0194(3) Uani 1 1 d . . .
H4N H 0.2729(19) 0.1458(10) 0.8608(8) 0.023 Uiso 1 1 d . . .
C5 C 0.29046(16) 0.27353(8) 0.93537(7) 0.0192(4) Uani 1 1 d . . .
C6 C 0.27703(16) 0.22770(8) 0.85397(7) 0.0192(4) Uani 1 1 d . . .
C7 C 0.28802(16) 0.17140(8) 0.92990(7) 0.0191(4) Uani 1 1 d . . .
C8 C 0.29404(17) 0.22077(8) 0.95780(7) 0.0213(4) Uani 1 1 d . . .
H8 H 0.299(2) 0.2173(9) 0.9939(9) 0.026 Uiso 1 1 d . . .
O7 O 0.31028(13) 0.37820(6) 0.84243(5) 0.0269(3) Uani 1 1 d . . .
O8 O 0.25739(14) 0.48398(6) 0.98023(5) 0.0295(3) Uani 1 1 d . . .
O9 O 0.21820(12) 0.57004(5) 0.83033(5) 0.0238(3) Uani 1 1 d . . .
N5 N 0.27939(15) 0.43117(7) 0.91076(6) 0.0214(3) Uani 1 1 d . . .
H5N H 0.284(2) 0.3997(10) 0.9283(9) 0.026 Uiso 1 1 d . . .
N6 N 0.23910(15) 0.52599(7) 0.90478(6) 0.0215(3) Uani 1 1 d . . .
H6N H 0.219(2) 0.5605(10) 0.9181(8) 0.026 Uiso 1 1 d . . .
C9 C 0.28764(17) 0.42580(8) 0.85920(7) 0.0202(4) Uani 1 1 d . . .
C10 C 0.25870(17) 0.48078(8) 0.93482(7) 0.0214(4) Uani 1 1 d . . .
C11 C 0.24173(16) 0.52504(8) 0.85313(7) 0.0201(4) Uani 1 1 d . . .
C12 C 0.27046(17) 0.47408(8) 0.83119(7) 0.0212(4) Uani 1 1 d . . .
H12 H 0.273(2) 0.4703(9) 0.7975(9) 0.025 Uiso 1 1 d . . .
O10 O 0.20486(13) 0.82439(6) 0.95090(5) 0.0256(3) Uani 1 1 d . . .
O11 O 0.25807(15) 0.72449(6) 0.81018(5) 0.0336(4) Uani 1 1 d . . .
O12 O 0.18622(14) 0.62640(6) 0.95009(5) 0.0281(3) Uani 1 1 d . . .
N7 N 0.22714(15) 0.77336(7) 0.88104(6) 0.0217(3) Uani 1 1 d . . .
H7N H 0.228(2) 0.8065(10) 0.8657(9) 0.026 Uiso 1 1 d . . .
N8 N 0.22120(14) 0.67657(7) 0.88075(6) 0.0211(3) Uani 1 1 d . . .
H8N H 0.221(2) 0.6430(10) 0.8633(9) 0.025 Uiso 1 1 d . . .
C13 C 0.20776(17) 0.77639(8) 0.93200(7) 0.0204(4) Uani 1 1 d . . .
C14 C 0.23671(17) 0.72485(8) 0.85448(7) 0.0219(4) Uani 1 1 d . . .
C15 C 0.19935(17) 0.67420(8) 0.93174(7) 0.0206(4) Uani 1 1 d . . .
C16 C 0.19397(18) 0.72544(8) 0.95649(7) 0.0226(4) Uani 1 1 d . . .
H16 H 0.182(2) 0.7245(9) 0.9910(9) 0.027 Uiso 1 1 d . . .
N9 N 0.39095(15) 0.29681(7) 0.71576(5) 0.0210(3) Uani 1 1 d . . .
H9N H 0.284(2) 0.2976(12) 0.7209(10) 0.050(8) Uiso 1 1 d . . .
N10 N 0.16467(15) 0.30725(7) 0.71382(6) 0.0221(3) Uani 1 1 d . . .
C17 C 0.39264(17) 0.32207(8) 0.66626(6) 0.0196(4) Uani 1 1 d . . .
C18 C 0.49751(18) 0.33126(8) 0.64411(7) 0.0242(4) Uani 1 1 d . . .
H18 H 0.5687 0.3237 0.6615 0.029 Uiso 1 1 calc R . .
C19 C 0.49980(18) 0.35196(8) 0.59532(7) 0.0260(4) Uani 1 1 d . . .
H19 H 0.5726 0.3585 0.5803 0.031 Uiso 1 1 calc R . .
C20 C 0.39716(18) 0.36250(8) 0.56985(7) 0.0239(4) Uani 1 1 d . . .
H20 H 0.3998 0.3755 0.5370 0.029 Uiso 1 1 calc R . .
C21 C 0.28671(17) 0.35419(7) 0.59195(7) 0.0206(4) Uani 1 1 d . . .
C22 C 0.28273(17) 0.33369(7) 0.64176(6) 0.0185(4) Uani 1 1 d . . .
C23 C 0.16986(17) 0.32710(8) 0.66265(7) 0.0197(4) Uani 1 1 d . . .
C24 C 0.06943(18) 0.33889(8) 0.63597(7) 0.0244(4) Uani 1 1 d . . .
H24 H -0.0043 0.3346 0.6508 0.029 Uiso 1 1 calc R . .
C25 C 0.07428(19) 0.35748(8) 0.58648(7) 0.0264(4) Uani 1 1 d . . .
H25 H 0.0041 0.3648 0.5683 0.032 Uiso 1 1 calc R . .
C26 C 0.18066(18) 0.36489(8) 0.56512(7) 0.0237(4) Uani 1 1 d . . .
H26 H 0.1836 0.3773 0.5321 0.028 Uiso 1 1 calc R . .
C27 C 0.4577(2) 0.32963(10) 0.75390(7) 0.0328(5) Uani 1 1 d . . .
H27A H 0.5406 0.3305 0.7458 0.049 Uiso 1 1 calc R . .
H27B H 0.4488 0.3124 0.7862 0.049 Uiso 1 1 calc R . .
H27C H 0.4272 0.3675 0.7547 0.049 Uiso 1 1 calc R . .
C28 C 0.4320(2) 0.23784(9) 0.71440(8) 0.0314(5) Uani 1 1 d . . .
H28A H 0.3875 0.2176 0.6890 0.047 Uiso 1 1 calc R . .
H28B H 0.4200 0.2205 0.7464 0.047 Uiso 1 1 calc R . .
H28C H 0.5153 0.2369 0.7069 0.047 Uiso 1 1 calc R . .
C29 C 0.0950(2) 0.25530(10) 0.71786(8) 0.0353(5) Uani 1 1 d . . .
H29A H 0.0135 0.2627 0.7082 0.053 Uiso 1 1 calc R . .
H29B H 0.0987 0.2421 0.7519 0.053 Uiso 1 1 calc R . .
H29C H 0.1272 0.2271 0.6962 0.053 Uiso 1 1 calc R . .
C30 C 0.1221(2) 0.35162(10) 0.74733(8) 0.0342(5) Uani 1 1 d . . .
H30A H 0.1714 0.3845 0.7443 0.051 Uiso 1 1 calc R . .
H30B H 0.1259 0.3384 0.7814 0.051 Uiso 1 1 calc R . .
H30C H 0.0411 0.3610 0.7383 0.051 Uiso 1 1 calc R . .
N11 N 0.88752(15) 0.43223(7) 0.89166(6) 0.0244(4) Uani 1 1 d . . .
H11N H 0.763(3) 0.4367(12) 0.8865(10) 0.052(8) Uiso 1 1 d . . .
N12 N 0.66160(15) 0.42786(7) 0.88535(6) 0.0224(3) Uani 1 1 d . . .
C31 C 0.89098(17) 0.37151(8) 0.89747(7) 0.0212(4) Uani 1 1 d . . .
C32 C 0.99518(18) 0.34307(9) 0.89984(7) 0.0260(4) Uani 1 1 d . . .
H32 H 1.0666 0.3627 0.8968 0.031 Uiso 1 1 calc R . .
C33 C 0.99777(19) 0.28482(9) 0.90682(8) 0.0292(4) Uani 1 1 d . . .
H33 H 1.0705 0.2659 0.9083 0.035 Uiso 1 1 calc R . .
C34 C 0.89537(18) 0.25583(8) 0.91136(7) 0.0246(4) Uani 1 1 d . . .
H34 H 0.8977 0.2170 0.9166 0.030 Uiso 1 1 calc R . .
C35 C 0.78571(17) 0.28357(8) 0.90830(6) 0.0207(4) Uani 1 1 d . . .
C36 C 0.78141(16) 0.34270(8) 0.90090(6) 0.0191(4) Uani 1 1 d . . .
C37 C 0.66782(17) 0.36750(8) 0.89580(7) 0.0204(4) Uani 1 1 d . . .
C38 C 0.56728(18) 0.33672(9) 0.89864(8) 0.0278(4) Uani 1 1 d . . .
H38 H 0.4932 0.3542 0.8949 0.033 Uiso 1 1 calc R . .
C39 C 0.57375(19) 0.27866(9) 0.90723(9) 0.0313(5) Uani 1 1 d . . .
H39 H 0.5039 0.2577 0.9098 0.038 Uiso 1 1 calc R . .
C40 C 0.68004(19) 0.25296(8) 0.91176(7) 0.0261(4) Uani 1 1 d . . .
H40 H 0.6833 0.2142 0.9173 0.031 Uiso 1 1 calc R . .
C41 C 0.9325(2) 0.46123(9) 0.93676(9) 0.0347(5) Uani 1 1 d . . .
H41A H 0.8883 0.4491 0.9652 0.052 Uiso 1 1 calc R . .
H41B H 0.9234 0.5012 0.9325 0.052 Uiso 1 1 calc R . .
H41C H 1.0154 0.4524 0.9421 0.052 Uiso 1 1 calc R . .
C42 C 0.9475(2) 0.45161(10) 0.84685(8) 0.0339(5) Uani 1 1 d . . .
H42A H 1.0315 0.4442 0.8503 0.051 Uiso 1 1 calc R . .
H42B H 0.9348 0.4914 0.8427 0.051 Uiso 1 1 calc R . .
H42C H 0.9157 0.4320 0.8180 0.051 Uiso 1 1 calc R . .
C43 C 0.6032(2) 0.45998(9) 0.92492(8) 0.0320(5) Uani 1 1 d . . .
H43A H 0.5210 0.4488 0.9265 0.048 Uiso 1 1 calc R . .
H43B H 0.6076 0.4996 0.9175 0.048 Uiso 1 1 calc R . .
H43C H 0.6426 0.4526 0.9566 0.048 Uiso 1 1 calc R . .
C44 C 0.6077(2) 0.43983(9) 0.83565(8) 0.0303(5) Uani 1 1 d . . .
H44A H 0.6504 0.4197 0.8105 0.045 Uiso 1 1 calc R . .
H44B H 0.6119 0.4796 0.8291 0.045 Uiso 1 1 calc R . .
H44C H 0.5258 0.4280 0.8349 0.045 Uiso 1 1 calc R . .
N13 N 0.11791(14) 0.56548(6) 0.56934(5) 0.0199(3) Uani 1 1 d . . .
N14 N 0.34557(14) 0.57108(6) 0.56579(5) 0.0190(3) Uani 1 1 d . . .
H14N H 0.254(2) 0.5667(9) 0.5594(8) 0.023 Uiso 1 1 d . . .
C45 C 0.12122(17) 0.60001(7) 0.61387(6) 0.0190(4) Uani 1 1 d . . .
C46 C 0.02015(18) 0.61648(8) 0.63588(7) 0.0230(4) Uani 1 1 d . . .
H46 H -0.0534 0.6061 0.6218 0.028 Uiso 1 1 calc R . .
C47 C 0.02455(19) 0.64901(8) 0.67962(7) 0.0258(4) Uani 1 1 d . . .
H47 H -0.0459 0.6606 0.6942 0.031 Uiso 1 1 calc R . .
C48 C 0.13056(18) 0.66354(8) 0.70060(7) 0.0239(4) Uani 1 1 d . . .
H48 H 0.1326 0.6847 0.7300 0.029 Uiso 1 1 calc R . .
C49 C 0.23758(18) 0.64743(8) 0.67889(6) 0.0206(4) Uani 1 1 d . . .
C50 C 0.23400(17) 0.61517(7) 0.63414(6) 0.0186(4) Uani 1 1 d . . .
C51 C 0.34433(17) 0.60145(7) 0.61352(6) 0.0189(4) Uani 1 1 d . . .
C52 C 0.44877(18) 0.61635(8) 0.63573(7) 0.0227(4) Uani 1 1 d . . .
H52 H 0.5202 0.6061 0.6212 0.027 Uiso 1 1 calc R . .
C53 C 0.45065(18) 0.64690(8) 0.68019(7) 0.0253(4) Uani 1 1 d . . .
H53 H 0.5231 0.6568 0.6955 0.030 Uiso 1 1 calc R . .
C54 C 0.34704(19) 0.66222(8) 0.70105(7) 0.0247(4) Uani 1 1 d . . .
H54 H 0.3487 0.6830 0.7307 0.030 Uiso 1 1 calc R . .
C55 C 0.0393(2) 0.58768(10) 0.52979(7) 0.0302(5) Uani 1 1 d . . .
H55A H -0.0419 0.5859 0.5404 0.045 Uiso 1 1 calc R . .
H55B H 0.0478 0.5656 0.4999 0.045 Uiso 1 1 calc R . .
H55C H 0.0601 0.6262 0.5230 0.045 Uiso 1 1 calc R . .
C56 C 0.09049(19) 0.50654(8) 0.58091(8) 0.0280(4) Uani 1 1 d . . .
H56A H 0.1445 0.4932 0.6068 0.042 Uiso 1 1 calc R . .
H56B H 0.0989 0.4839 0.5513 0.042 Uiso 1 1 calc R . .
H56C H 0.0100 0.5038 0.5922 0.042 Uiso 1 1 calc R . .
C57 C 0.39773(19) 0.60585(9) 0.52600(7) 0.0279(4) Uani 1 1 d . . .
H57A H 0.3507 0.6394 0.5211 0.042 Uiso 1 1 calc R . .
H57B H 0.3986 0.5847 0.4953 0.042 Uiso 1 1 calc R . .
H57C H 0.4779 0.6161 0.5357 0.042 Uiso 1 1 calc R . .
C58 C 0.40377(19) 0.51527(8) 0.56985(8) 0.0276(4) Uani 1 1 d . . .
H58A H 0.4882 0.5202 0.5750 0.041 Uiso 1 1 calc R . .
H58B H 0.3891 0.4944 0.5395 0.041 Uiso 1 1 calc R . .
H58C H 0.3719 0.4950 0.5977 0.041 Uiso 1 1 calc R . .
N15 N 0.82403(14) 0.65642(6) 0.94075(5) 0.0191(3) Uani 1 1 d . . .
H15N H 0.731(2) 0.6550(11) 0.9480(10) 0.044(7) Uiso 1 1 d . . .
N16 N 0.59375(14) 0.64957(7) 0.93696(5) 0.0204(3) Uani 1 1 d . . .
C59 C 0.82388(17) 0.63426(8) 0.88970(6) 0.0194(4) Uani 1 1 d . . .
C60 C 0.92864(18) 0.62678(8) 0.86700(7) 0.0241(4) Uani 1 1 d . . .
H60 H 0.9999 0.6338 0.8845 0.029 Uiso 1 1 calc R . .
C61 C 0.93068(18) 0.60850(8) 0.81740(7) 0.0255(4) Uani 1 1 d . . .
H61 H 1.0033 0.6041 0.8016 0.031 Uiso 1 1 calc R . .
C62 C 0.82792(18) 0.59723(8) 0.79215(7) 0.0240(4) Uani 1 1 d . . .
H62 H 0.8302 0.5855 0.7589 0.029 Uiso 1 1 calc R . .
C63 C 0.71817(17) 0.60292(8) 0.81521(7) 0.0205(4) Uani 1 1 d . . .
C64 C 0.71387(17) 0.62218(7) 0.86541(6) 0.0187(4) Uani 1 1 d . . .
C65 C 0.60042(17) 0.62747(8) 0.88672(7) 0.0199(4) Uani 1 1 d . . .
C66 C 0.50107(18) 0.61304(8) 0.86001(7) 0.0234(4) Uani 1 1 d . . .
H66 H 0.4272 0.6158 0.8750 0.028 Uiso 1 1 calc R . .
C67 C 0.50637(18) 0.59422(8) 0.81075(7) 0.0251(4) Uani 1 1 d . . .
H67 H 0.4366 0.5848 0.7930 0.030 Uiso 1 1 calc R . .
C68 C 0.61269(18) 0.58967(8) 0.78880(7) 0.0236(4) Uani 1 1 d . . .
H68 H 0.6161 0.5776 0.7557 0.028 Uiso 1 1 calc R . .
C69 C 0.89233(18) 0.62078(8) 0.97646(7) 0.0251(4) Uani 1 1 d . . .
H69A H 0.8591 0.5834 0.9765 0.038 Uiso 1 1 calc R . .
H69B H 0.8883 0.6366 1.0095 0.038 Uiso 1 1 calc R . .
H69C H 0.9741 0.6190 0.9666 0.038 Uiso 1 1 calc R . .
C70 C 0.86720(18) 0.71544(8) 0.94264(7) 0.0248(4) Uani 1 1 d . . .
H70A H 0.9492 0.7166 0.9331 0.037 Uiso 1 1 calc R . .
H70B H 0.8605 0.7298 0.9761 0.037 Uiso 1 1 calc R . .
H70C H 0.8199 0.7382 0.9200 0.037 Uiso 1 1 calc R . .
C71 C 0.53128(19) 0.61226(9) 0.97085(7) 0.0271(4) Uani 1 1 d . . .
H71A H 0.4509 0.6067 0.9586 0.041 Uiso 1 1 calc R . .
H71B H 0.5300 0.6289 1.0037 0.041 Uiso 1 1 calc R . .
H71C H 0.5717 0.5766 0.9727 0.041 Uiso 1 1 calc R . .
C72 C 0.54029(19) 0.70607(8) 0.93670(7) 0.0262(4) Uani 1 1 d . . .
H72A H 0.5847 0.7304 0.9152 0.039 Uiso 1 1 calc R . .
H72B H 0.5421 0.7210 0.9702 0.039 Uiso 1 1 calc R . .
H72C H 0.4591 0.7038 0.9246 0.039 Uiso 1 1 calc R . .
O13 O 0.17521(14) 0.53496(7) 0.73133(5) 0.0328(3) Uani 1 1 d . . .
H13O H 0.1852 0.5491 0.7593 0.039 Uiso 1 1 calc R . .
C73 C 0.0634(2) 0.50901(10) 0.72837(8) 0.0342(5) Uani 1 1 d . . .
H73A H 0.0498 0.4887 0.7589 0.051 Uiso 1 1 calc R . .
H73B H 0.0608 0.4833 0.7005 0.051 Uiso 1 1 calc R . .
H73C H 0.0026 0.5372 0.7237 0.051 Uiso 1 1 calc R . .
O14 O 0.33385(16) 0.46466(8) 0.68808(7) 0.0472(5) Uani 1 1 d . . .
H14O H 0.2878 0.4823 0.7058 0.057 Uiso 1 1 calc R . .
C74 C 0.4509(2) 0.47757(10) 0.70219(9) 0.0397(6) Uani 1 1 d . . .
H74A H 0.4697 0.5150 0.6911 0.060 Uiso 1 1 calc R . .
H74B H 0.5040 0.4511 0.6871 0.060 Uiso 1 1 calc R . .
H74C H 0.4598 0.4756 0.7380 0.060 Uiso 1 1 calc R . .
O15 O 0.79349(18) 0.36878(7) 0.77027(6) 0.0461(5) Uani 1 1 d . . .
H15O H 0.7776 0.3731 0.7402 0.055 Uiso 1 1 calc R . .
C75 C 0.8008(2) 0.31120(9) 0.78114(8) 0.0344(5) Uani 1 1 d . . .
H75A H 0.8726 0.3038 0.8004 0.052 Uiso 1 1 calc R . .
H75B H 0.8018 0.2901 0.7504 0.052 Uiso 1 1 calc R . .
H75C H 0.7329 0.3001 0.8001 0.052 Uiso 1 1 calc R . .

loop_
 _atom_site_aniso_label
 _atom_site_aniso_U_11
 _atom_site_aniso_U_22
 _atom_site_aniso_U_33
 _atom_site_aniso_U_23
 _atom_site_aniso_U_13
 _atom_site_aniso_U_12
O1 0.0417(9) 0.0195(7) 0.0189(7) -0.0017(5) 0.0047(6) -0.0004(6)
O2 0.0432(9) 0.0245(7) 0.0138(6) 0.0008(5) 0.0038(6) 0.0000(6)
O3 0.0410(9) 0.0205(7) 0.0152(6) 0.0018(5) 0.0050(6) -0.0011(6)
N1 0.0296(9) 0.0182(8) 0.0157(7) 0.0014(6) 0.0027(6) 0.0008(6)
N2 0.0302(9) 0.0175(8) 0.0132(7) -0.0003(6) 0.0030(6) -0.0009(6)
C1 0.0225(9) 0.0214(9) 0.0172(9) -0.0003(7) 0.0031(7) 0.0008(7)
C2 0.0217(9) 0.0202(9) 0.0177(8) 0.0009(7) 0.0015(7) 0.0022(7)
C3 0.0225(9) 0.0213(9) 0.0149(8) 0.0012(7) 0.0035(7) 0.0009(7)
C4 0.0315(11) 0.0225(10) 0.0135(8) -0.0008(7) 0.0037(7) 0.0001(8)
O4 0.0327(8) 0.0204(7) 0.0177(6) -0.0027(5) 0.0035(5) 0.0000(6)
O5 0.0409(9) 0.0271(7) 0.0129(6) 0.0003(5) 0.0041(6) 0.0015(6)
O6 0.0437(9) 0.0197(7) 0.0162(6) 0.0004(5) 0.0031(6) -0.0009(6)
N3 0.0248(8) 0.0181(8) 0.0153(7) 0.0011(6) 0.0033(6) 0.0008(6)
N4 0.0255(9) 0.0185(8) 0.0144(7) -0.0023(6) 0.0039(6) 0.0006(6)
C5 0.0195(9) 0.0234(9) 0.0151(8) -0.0032(7) 0.0037(7) -0.0004(7)
C6 0.0200(9) 0.0218(9) 0.0159(8) -0.0012(7) 0.0035(7) 0.0008(7)
C7 0.0202(9) 0.0215(9) 0.0158(8) 0.0002(7) 0.0026(7) -0.0004(7)
C8 0.0284(10) 0.0220(9) 0.0137(8) -0.0013(7) 0.0046(7) 0.0006(7)
O7 0.0415(9) 0.0206(7) 0.0190(7) 0.0002(5) 0.0066(6) 0.0035(6)
O8 0.0472(9) 0.0262(7) 0.0154(7) -0.0006(5) 0.0056(6) -0.0016(6)
O9 0.0318(8) 0.0198(7) 0.0198(7) 0.0020(5) 0.0038(6) 0.0021(5)
N5 0.0283(9) 0.0189(8) 0.0171(7) 0.0026(6) 0.0028(6) 0.0010(6)
N6 0.0294(9) 0.0174(8) 0.0180(8) -0.0014(6) 0.0055(6) 0.0000(6)
C9 0.0221(9) 0.0204(9) 0.0180(9) -0.0002(7) 0.0030(7) 0.0006(7)
C10 0.0247(10) 0.0221(9) 0.0177(9) -0.0003(7) 0.0046(7) -0.0023(7)
C11 0.0212(9) 0.0201(9) 0.0192(9) 0.0012(7) 0.0027(7) -0.0027(7)
C12 0.0270(10) 0.0217(9) 0.0149(9) -0.0005(7) 0.0031(7) 0.0010(7)
O10 0.0362(8) 0.0203(7) 0.0205(7) -0.0027(5) 0.0059(6) 0.0003(6)
O11 0.0574(11) 0.0285(8) 0.0153(7) 0.0003(6) 0.0097(6) 0.0035(7)
O12 0.0429(9) 0.0201(7) 0.0217(7) -0.0001(5) 0.0101(6) -0.0009(6)
N7 0.0299(9) 0.0190(8) 0.0164(8) 0.0005(6) 0.0047(6) 0.0002(6)
N8 0.0272(9) 0.0199(8) 0.0164(8) -0.0031(6) 0.0052(6) 0.0005(6)
C13 0.0210(9) 0.0234(9) 0.0168(9) -0.0025(7) 0.0017(7) 0.0011(7)
C14 0.0258(10) 0.0223(9) 0.0178(9) -0.0011(7) 0.0026(7) 0.0022(7)
C15 0.0227(10) 0.0228(9) 0.0166(8) 0.0010(7) 0.0059(7) 0.0003(7)
C16 0.0294(10) 0.0231(10) 0.0154(9) -0.0009(7) 0.0061(7) 0.0007(8)
N9 0.0249(9) 0.0260(8) 0.0123(7) 0.0004(6) 0.0025(6) 0.0021(6)
N10 0.0259(9) 0.0263(9) 0.0144(7) 0.0005(6) 0.0046(6) -0.0004(7)
C17 0.0256(10) 0.0194(9) 0.0141(8) -0.0013(7) 0.0045(7) 0.0014(7)
C18 0.0233(10) 0.0282(10) 0.0213(9) -0.0020(8) 0.0020(7) 0.0004(8)
C19 0.0273(10) 0.0282(10) 0.0228(10) 0.0008(8) 0.0102(8) -0.0031(8)
C20 0.0337(11) 0.0206(9) 0.0177(9) 0.0009(7) 0.0073(8) -0.0008(8)
C21 0.0297(10) 0.0157(9) 0.0164(8) 0.0001(7) 0.0042(7) 0.0013(7)
C22 0.0246(10) 0.0155(8) 0.0156(8) -0.0015(7) 0.0026(7) -0.0005(7)
C23 0.0255(10) 0.0177(9) 0.0162(8) -0.0009(7) 0.0031(7) 0.0007(7)
C24 0.0245(10) 0.0262(10) 0.0228(9) 0.0011(8) 0.0042(8) 0.0023(8)
C25 0.0284(11) 0.0272(10) 0.0233(10) 0.0031(8) -0.0025(8) 0.0036(8)
C26 0.0318(11) 0.0226(10) 0.0168(9) 0.0028(7) 0.0030(8) 0.0029(8)
C27 0.0308(12) 0.0498(14) 0.0177(9) -0.0067(9) 0.0004(8) -0.0046(10)
C28 0.0431(13) 0.0310(11) 0.0205(10) 0.0066(8) 0.0094(9) 0.0127(9)
C29 0.0407(13) 0.0377(13) 0.0276(11) 0.0094(9) 0.0000(9) -0.0121(10)
C30 0.0374(13) 0.0454(13) 0.0199(10) -0.0091(9) 0.0057(9) 0.0079(10)
N11 0.0275(9) 0.0230(8) 0.0229(8) -0.0008(6) 0.0061(7) -0.0035(7)
N12 0.0263(9) 0.0197(8) 0.0213(8) 0.0003(6) 0.0035(6) 0.0020(6)
C31 0.0253(10) 0.0240(10) 0.0144(8) -0.0016(7) 0.0036(7) -0.0013(7)
C32 0.0214(10) 0.0312(11) 0.0257(10) -0.0031(8) 0.0047(8) -0.0032(8)
C33 0.0233(10) 0.0329(11) 0.0316(11) -0.0012(9) 0.0026(8) 0.0056(8)
C34 0.0292(11) 0.0230(10) 0.0217(9) 0.0002(8) 0.0021(8) 0.0038(8)
C35 0.0247(10) 0.0246(10) 0.0130(8) 0.0007(7) 0.0041(7) 0.0009(7)
C36 0.0238(10) 0.0230(9) 0.0106(8) -0.0004(7) 0.0036(7) -0.0010(7)
C37 0.0249(10) 0.0206(9) 0.0158(8) -0.0008(7) 0.0040(7) 0.0002(7)
C38 0.0234(10) 0.0285(11) 0.0317(11) -0.0009(8) 0.0055(8) 0.0015(8)
C39 0.0265(11) 0.0263(11) 0.0416(12) 0.0001(9) 0.0087(9) -0.0045(8)
C40 0.0316(11) 0.0199(10) 0.0270(10) 0.0017(8) 0.0063(8) -0.0014(8)
C41 0.0380(13) 0.0295(11) 0.0365(12) -0.0102(9) -0.0020(10) -0.0019(9)
C42 0.0368(13) 0.0313(12) 0.0341(12) 0.0074(9) 0.0109(10) -0.0073(9)
C43 0.0366(12) 0.0268(11) 0.0330(11) -0.0092(9) 0.0094(9) 0.0018(9)
C44 0.0365(12) 0.0283(11) 0.0261(10) 0.0069(8) -0.0002(9) 0.0037(9)
N13 0.0242(8) 0.0211(8) 0.0144(7) -0.0023(6) 0.0014(6) -0.0017(6)
N14 0.0256(9) 0.0194(8) 0.0122(7) -0.0014(6) 0.0045(6) -0.0004(6)
C45 0.0267(10) 0.0175(9) 0.0131(8) 0.0001(7) 0.0040(7) -0.0019(7)
C46 0.0249(10) 0.0232(10) 0.0213(9) -0.0011(7) 0.0050(8) -0.0011(7)
C47 0.0313(11) 0.0238(10) 0.0227(9) -0.0019(8) 0.0112(8) 0.0027(8)
C48 0.0344(11) 0.0220(10) 0.0157(8) -0.0022(7) 0.0090(8) -0.0004(8)
C49 0.0308(10) 0.0180(9) 0.0132(8) 0.0004(7) 0.0052(7) -0.0023(7)
C50 0.0267(10) 0.0156(8) 0.0136(8) 0.0017(6) 0.0037(7) -0.0011(7)
C51 0.0268(10) 0.0179(9) 0.0120(8) -0.0008(7) 0.0037(7) -0.0011(7)
C52 0.0246(10) 0.0235(10) 0.0201(9) 0.0000(7) 0.0035(7) -0.0006(7)
C53 0.0288(11) 0.0276(10) 0.0194(9) -0.0024(8) -0.0030(8) -0.0035(8)
C54 0.0362(11) 0.0228(10) 0.0151(8) -0.0024(7) 0.0013(8) -0.0014(8)
C55 0.0339(12) 0.0393(12) 0.0172(9) -0.0025(8) -0.0028(8) 0.0063(9)
C56 0.0351(12) 0.0222(10) 0.0267(10) -0.0048(8) 0.0051(8) -0.0048(8)
C57 0.0353(12) 0.0347(11) 0.0140(9) -0.0002(8) 0.0089(8) -0.0085(9)
C58 0.0332(11) 0.0256(10) 0.0240(10) -0.0041(8) 0.0012(8) 0.0065(8)
N15 0.0234(8) 0.0207(8) 0.0133(7) -0.0014(6) 0.0032(6) -0.0003(6)
N16 0.0251(8) 0.0215(8) 0.0146(7) -0.0015(6) 0.0052(6) 0.0005(6)
C59 0.0256(10) 0.0190(9) 0.0136(8) -0.0003(7) 0.0030(7) 0.0008(7)
C60 0.0252(10) 0.0267(10) 0.0205(9) -0.0015(8) 0.0022(7) -0.0004(8)
C61 0.0264(10) 0.0299(11) 0.0207(9) -0.0011(8) 0.0089(8) 0.0026(8)
C62 0.0329(11) 0.0235(10) 0.0159(8) -0.0021(7) 0.0069(8) 0.0024(8)
C63 0.0274(10) 0.0181(9) 0.0160(8) 0.0008(7) 0.0036(7) 0.0000(7)
C64 0.0249(10) 0.0157(8) 0.0156(8) 0.0015(7) 0.0033(7) 0.0011(7)
C65 0.0272(10) 0.0178(9) 0.0148(8) 0.0007(7) 0.0048(7) 0.0016(7)
C66 0.0243(10) 0.0255(10) 0.0204(9) 0.0010(7) 0.0031(7) -0.0004(8)
C67 0.0274(10) 0.0271(10) 0.0206(9) -0.0006(8) -0.0021(8) -0.0024(8)
C68 0.0339(11) 0.0217(10) 0.0154(8) -0.0012(7) 0.0014(7) 0.0005(8)
C69 0.0303(11) 0.0290(10) 0.0160(9) 0.0019(8) 0.0023(8) 0.0050(8)
C70 0.0297(11) 0.0228(10) 0.0220(9) -0.0030(7) 0.0045(8) -0.0025(8)
C71 0.0348(12) 0.0308(11) 0.0160(9) 0.0001(8) 0.0077(8) -0.0048(9)
C72 0.0301(11) 0.0241(10) 0.0244(10) -0.0039(8) 0.0033(8) 0.0045(8)
O13 0.0387(9) 0.0391(9) 0.0210(7) 0.0032(6) 0.0066(6) 0.0015(7)
C73 0.0422(13) 0.0362(12) 0.0245(10) 0.0020(9) 0.0093(9) 0.0015(10)
O14 0.0393(10) 0.0521(11) 0.0506(11) -0.0203(9) 0.0109(8) -0.0045(8)
C74 0.0414(14) 0.0382(13) 0.0395(13) 0.0022(10) 0.0041(10) -0.0043(10)
O15 0.0910(15) 0.0300(9) 0.0175(7) -0.0012(6) 0.0058(8) 0.0082(9)
C75 0.0525(15) 0.0318(12) 0.0191(10) -0.0006(8) 0.0031(9) 0.0007(10)

_geom_special_details
;
 All esds (except the esd in the dihedral angle between two l.s. planes)
 are estimated using the full covariance matrix.  The cell esds are taken
 into account individually in the estimation of esds in distances, angles
 and torsion angles; correlations between esds in cell parameters are only
 used when they are defined by crystal symmetry.  An approximate (isotropic)
 treatment of cell esds is used for estimating esds involving l.s. planes.
;

loop_
 _geom_bond_atom_site_label_1
 _geom_bond_atom_site_label_2
 _geom_bond_distance
 _geom_bond_site_symmetry_2
 _geom_bond_publ_flag
O1 C1 1.281(2) . ?
O2 C2 1.242(2) . ?
O3 C3 1.266(2) . ?
N1 H1N 0.90(2) . ?
N1 C1 1.412(2) . ?
N1 C2 1.382(2) . ?
N2 H2N 0.90(2) . ?
N2 C2 1.380(2) . ?
N2 C3 1.414(2) . ?
C1 C4 1.406(3) . ?
C3 C4 1.421(3) . ?
C4 H4 0.95(2) . ?
O4 C5 1.273(2) . ?
O5 C6 1.241(2) . ?
O6 C7 1.268(2) . ?
N3 H3N 0.91(2) . ?
N3 C5 1.412(2) . ?
N3 C6 1.382(2) . ?
N4 H4N 0.90(2) . ?
N4 C6 1.383(2) . ?
N4 C7 1.416(2) . ?
C5 C8 1.415(3) . ?
C7 C8 1.416(3) . ?
C8 H8 0.99(2) . ?
O7 C9 1.268(2) . ?
O8 C10 1.239(2) . ?
O9 C11 1.279(2) . ?
N5 H5N 0.90(2) . ?
N5 C9 1.415(2) . ?
N5 C10 1.390(2) . ?
N6 H6N 0.94(2) . ?
N6 C10 1.381(2) . ?
N6 C11 1.407(2) . ?
C9 C12 1.406(3) . ?
C11 C12 1.412(3) . ?
C12 H12 0.92(2) . ?
O10 C13 1.271(2) . ?
O11 C14 1.236(2) . ?
O12 C15 1.270(2) . ?
N7 H7N 0.90(2) . ?
N7 C13 1.412(2) . ?
N7 C14 1.384(2) . ?
N8 H8N 0.94(2) . ?
N8 C14 1.383(2) . ?
N8 C15 1.417(2) . ?
C13 C16 1.412(3) . ?
C15 C16 1.413(3) . ?
C16 H16 0.95(2) . ?
N9 H9N 1.23(3) . ?
N9 C17 1.480(2) . ?
N9 C27 1.501(3) . ?
N9 C28 1.503(3) . ?
N10 H9N 1.40(3) . ?
N10 C23 1.476(2) . ?
N10 C29 1.493(3) . ?
N10 C30 1.498(3) . ?
C17 C18 1.374(3) . ?
C17 C22 1.437(3) . ?
C18 H18 0.9500 . ?
C18 C19 1.420(3) . ?
C19 H19 0.9500 . ?
C19 C20 1.373(3) . ?
C20 H20 0.9500 . ?
C20 C21 1.427(3) . ?
C21 C22 1.445(2) . ?
C21 C26 1.425(3) . ?
C22 C23 1.432(3) . ?
C23 C24 1.374(3) . ?
C24 H24 0.9500 . ?
C24 C25 1.422(3) . ?
C25 H25 0.9500 . ?
C25 C26 1.373(3) . ?
C26 H26 0.9500 . ?
C27 H27A 0.9800 . ?
C27 H27B 0.9800 . ?
C27 H27C 0.9800 . ?
C28 H28A 0.9800 . ?
C28 H28B 0.9800 . ?
C28 H28C 0.9800 . ?
C29 H29A 0.9800 . ?
C29 H29B 0.9800 . ?
C29 H29C 0.9800 . ?
C30 H30A 0.9800 . ?
C30 H30B 0.9800 . ?
C30 H30C 0.9800 . ?
N11 H11N 1.43(3) . ?
N11 C31 1.478(3) . ?
N11 C41 1.495(3) . ?
N11 C42 1.489(3) . ?
N12 H11N 1.18(3) . ?
N12 C37 1.489(2) . ?
N12 C43 1.498(3) . ?
N12 C44 1.501(3) . ?
C31 C32 1.377(3) . ?
C31 C36 1.439(3) . ?
C32 H32 0.9500 . ?
C32 C33 1.422(3) . ?
C33 H33 0.9500 . ?
C33 C34 1.374(3) . ?
C34 H34 0.9500 . ?
C34 C35 1.423(3) . ?
C35 C36 1.445(3) . ?
C35 C40 1.423(3) . ?
C36 C37 1.435(3) . ?
C37 C38 1.374(3) . ?
C38 H38 0.9500 . ?
C38 C39 1.425(3) . ?
C39 H39 0.9500 . ?
C39 C40 1.369(3) . ?
C40 H40 0.9500 . ?
C41 H41A 0.9800 . ?
C41 H41B 0.9800 . ?
C41 H41C 0.9800 . ?
C42 H42A 0.9800 . ?
C42 H42B 0.9800 . ?
C42 H42C 0.9800 . ?
C43 H43A 0.9800 . ?
C43 H43B 0.9800 . ?
C43 H43C 0.9800 . ?
C44 H44A 0.9800 . ?
C44 H44B 0.9800 . ?
C44 H44C 0.9800 . ?
N13 C45 1.472(2) . ?
N13 C55 1.487(2) . ?
N13 C56 1.495(3) . ?
N14 H14N 1.06(2) . ?
N14 C51 1.493(2) . ?
N14 C57 1.506(2) . ?
N14 C58 1.508(2) . ?
C45 C46 1.374(3) . ?
C45 C50 1.439(3) . ?
C46 H46 0.9500 . ?
C46 C47 1.427(3) . ?
C47 H47 0.9500 . ?
C47 C48 1.374(3) . ?
C48 H48 0.9500 . ?
C48 C49 1.426(3) . ?
C49 C50 1.446(2) . ?
C49 C54 1.423(3) . ?
C50 C51 1.433(3) . ?
C51 C52 1.374(3) . ?
C52 H52 0.9500 . ?
C52 C53 1.418(3) . ?
C53 H53 0.9500 . ?
C53 C54 1.377(3) . ?
C54 H54 0.9500 . ?
C55 H55A 0.9800 . ?
C55 H55B 0.9800 . ?
C55 H55C 0.9800 . ?
C56 H56A 0.9800 . ?
C56 H56B 0.9800 . ?
C56 H56C 0.9800 . ?
C57 H57A 0.9800 . ?
C57 H57B 0.9800 . ?
C57 H57C 0.9800 . ?
C58 H58A 0.9800 . ?
C58 H58B 0.9800 . ?
C58 H58C 0.9800 . ?
N15 H15N 1.09(3) . ?
N15 C59 1.489(2) . ?
N15 C69 1.504(2) . ?
N15 C70 1.511(2) . ?
N16 C65 1.472(2) . ?
N16 C71 1.486(2) . ?
N16 C72 1.497(2) . ?
C59 C60 1.374(3) . ?
C59 C64 1.438(3) . ?
C60 H60 0.9500 . ?
C60 C61 1.421(3) . ?
C61 H61 0.9500 . ?
C61 C62 1.375(3) . ?
C62 H62 0.9500 . ?
C62 C63 1.424(3) . ?
C63 C64 1.445(2) . ?
C63 C68 1.426(3) . ?
C64 C65 1.440(3) . ?
C65 C66 1.379(3) . ?
C66 H66 0.9500 . ?
C66 C67 1.419(3) . ?
C67 H67 0.9500 . ?
C67 C68 1.372(3) . ?
C68 H68 0.9500 . ?
C69 H69A 0.9800 . ?
C69 H69B 0.9800 . ?
C69 H69C 0.9800 . ?
C70 H70A 0.9800 . ?
C70 H70B 0.9800 . ?
C70 H70C 0.9800 . ?
C71 H71A 0.9800 . ?
C71 H71B 0.9800 . ?
C71 H71C 0.9800 . ?
C72 H72A 0.9800 . ?
C72 H72B 0.9800 . ?
C72 H72C 0.9800 . ?
O13 H13O 0.8400 . ?
O13 C73 1.426(3) . ?
C73 H73A 0.9800 . ?
C73 H73B 0.9800 . ?
C73 H73C 0.9800 . ?
O14 H14O 0.8400 . ?
O14 C74 1.419(3) . ?
C74 H74A 0.9800 . ?
C74 H74B 0.9800 . ?
C74 H74C 0.9800 . ?
O15 H15O 0.8400 . ?
O15 C75 1.426(3) . ?
C75 H75A 0.9800 . ?
C75 H75B 0.9800 . ?
C75 H75C 0.9800 . ?

loop_
 _geom_angle_atom_site_label_1
 _geom_angle_atom_site_label_2
 _geom_angle_atom_site_label_3
 _geom_angle
 _geom_angle_site_symmetry_1
 _geom_angle_site_symmetry_3
 _geom_angle_publ_flag
H1N N1 C1 115.8(15) . . ?
H1N N1 C2 119.9(15) . . ?
C1 N1 C2 124.20(16) . . ?
H2N N2 C2 121.9(15) . . ?
H2N N2 C3 112.9(15) . . ?
C2 N2 C3 125.17(16) . . ?
O1 C1 N1 116.25(16) . . ?
O1 C1 C4 126.57(17) . . ?
N1 C1 C4 117.18(17) . . ?
O2 C2 N1 122.34(17) . . ?
O2 C2 N2 121.83(17) . . ?
N1 C2 N2 115.83(16) . . ?
O3 C3 N2 116.91(16) . . ?
O3 C3 C4 127.18(17) . . ?
N2 C3 C4 115.91(16) . . ?
C1 C4 C3 121.67(17) . . ?
C1 C4 H4 117.7(14) . . ?
C3 C4 H4 120.6(14) . . ?
H3N N3 C5 113.3(14) . . ?
H3N N3 C6 121.6(14) . . ?
C5 N3 C6 125.05(16) . . ?
H4N N4 C6 119.6(14) . . ?
H4N N4 C7 115.9(14) . . ?
C6 N4 C7 124.40(16) . . ?
O4 C5 N3 117.11(16) . . ?
O4 C5 C8 126.74(17) . . ?
N3 C5 C8 116.15(16) . . ?
O5 C6 N3 122.10(17) . . ?
O5 C6 N4 122.05(17) . . ?
N3 C6 N4 115.85(16) . . ?
O6 C7 N4 117.65(16) . . ?
O6 C7 C8 125.83(17) . . ?
N4 C7 C8 116.52(16) . . ?
C5 C8 C7 121.93(17) . . ?
C5 C8 H8 120.4(13) . . ?
C7 C8 H8 117.7(13) . . ?
H5N N5 C9 116.4(15) . . ?
H5N N5 C10 119.2(15) . . ?
C9 N5 C10 124.24(16) . . ?
H6N N6 C10 120.8(14) . . ?
H6N N6 C11 114.3(14) . . ?
C10 N6 C11 124.87(16) . . ?
O7 C9 N5 117.36(16) . . ?
O7 C9 C12 125.90(17) . . ?
N5 C9 C12 116.74(16) . . ?
O8 C10 N5 122.02(17) . . ?
O8 C10 N6 122.39(18) . . ?
N5 C10 N6 115.59(16) . . ?
O9 C11 N6 117.51(16) . . ?
O9 C11 C12 125.90(17) . . ?
N6 C11 C12 116.59(16) . . ?
C9 C12 C11 121.78(17) . . ?
C9 C12 H12 116.7(14) . . ?
C11 C12 H12 121.3(14) . . ?
H7N N7 C13 114.3(15) . . ?
H7N N7 C14 120.6(15) . . ?
C13 N7 C14 124.99(16) . . ?
H8N N8 C14 117.9(14) . . ?
H8N N8 C15 117.4(14) . . ?
C14 N8 C15 124.62(16) . . ?
O10 C13 N7 116.84(17) . . ?
O10 C13 C16 127.03(17) . . ?
N7 C13 C16 116.13(16) . . ?
O11 C14 N7 122.37(18) . . ?
O11 C14 N8 121.95(17) . . ?
N7 C14 N8 115.68(16) . . ?
O12 C15 N8 116.56(16) . . ?
O12 C15 C16 127.18(17) . . ?
N8 C15 C16 116.25(16) . . ?
C13 C16 C15 122.28(17) . . ?
C13 C16 H16 120.4(14) . . ?
C15 C16 H16 117.3(14) . . ?
H9N N9 C17 97.5(13) . . ?
H9N N9 C27 113.8(13) . . ?
H9N N9 C28 109.2(13) . . ?
C17 N9 C27 113.19(16) . . ?
C17 N9 C28 111.01(14) . . ?
C27 N9 C28 111.42(16) . . ?
H9N N10 C23 97.0(12) . . ?
H9N N10 C29 111.8(12) . . ?
H9N N10 C30 111.6(12) . . ?
C23 N10 C29 112.14(15) . . ?
C23 N10 C30 111.27(16) . . ?
C29 N10 C30 112.10(17) . . ?
N9 C17 C18 119.80(17) . . ?
N9 C17 C22 118.23(16) . . ?
C18 C17 C22 121.90(17) . . ?
C17 C18 H18 119.9 . . ?
C17 C18 C19 120.22(19) . . ?
H18 C18 C19 119.9 . . ?
C18 C19 H19 119.9 . . ?
C18 C19 C20 120.20(19) . . ?
H19 C19 C20 119.9 . . ?
C19 C20 H20 119.5 . . ?
C19 C20 C21 121.08(18) . . ?
H20 C20 C21 119.5 . . ?
C20 C21 C22 119.47(18) . . ?
C20 C21 C26 120.68(17) . . ?
C22 C21 C26 119.84(17) . . ?
C17 C22 C21 117.10(17) . . ?
C17 C22 C23 125.54(16) . . ?
C21 C22 C23 117.35(17) . . ?
N10 C23 C22 117.89(16) . . ?
N10 C23 C24 120.95(17) . . ?
C22 C23 C24 121.16(17) . . ?
C23 C24 H24 119.5 . . ?
C23 C24 C25 120.99(19) . . ?
H24 C24 C25 119.5 . . ?
C24 C25 H25 120.1 . . ?
C24 C25 C26 119.81(19) . . ?
H25 C25 C26 120.1 . . ?
C21 C26 C25 120.79(18) . . ?
C21 C26 H26 119.6 . . ?
C25 C26 H26 119.6 . . ?
N9 C27 H27A 109.5 . . ?
N9 C27 H27B 109.5 . . ?
N9 C27 H27C 109.5 . . ?
H27A C27 H27B 109.5 . . ?
H27A C27 H27C 109.5 . . ?
H27B C27 H27C 109.5 . . ?
N9 C28 H28A 109.5 . . ?
N9 C28 H28B 109.5 . . ?
N9 C28 H28C 109.5 . . ?
H28A C28 H28B 109.5 . . ?
H28A C28 H28C 109.5 . . ?
H28B C28 H28C 109.5 . . ?
N10 C29 H29A 109.5 . . ?
N10 C29 H29B 109.5 . . ?
N10 C29 H29C 109.5 . . ?
H29A C29 H29B 109.5 . . ?
H29A C29 H29C 109.5 . . ?
H29B C29 H29C 109.5 . . ?
N10 C30 H30A 109.5 . . ?
N10 C30 H30B 109.5 . . ?
N10 C30 H30C 109.5 . . ?
H30A C30 H30B 109.5 . . ?
H30A C30 H30C 109.5 . . ?
H30B C30 H30C 109.5 . . ?
H11N N11 C31 96.3(11) . . ?
H11N N11 C41 111.5(11) . . ?
H11N N11 C42 111.9(11) . . ?
C31 N11 C41 111.77(16) . . ?
C31 N11 C42 112.88(16) . . ?
C41 N11 C42 111.61(17) . . ?
H11N N12 C37 97.5(14) . . ?
H11N N12 C43 110.0(14) . . ?
H11N N12 C44 111.8(14) . . ?
C37 N12 C43 113.05(15) . . ?
C37 N12 C44 112.20(15) . . ?
C43 N12 C44 111.52(16) . . ?
N11 C31 C32 121.52(18) . . ?
N11 C31 C36 117.84(17) . . ?
C32 C31 C36 120.64(18) . . ?
C31 C32 H32 119.4 . . ?
C31 C32 C33 121.11(19) . . ?
H32 C32 C33 119.4 . . ?
C32 C33 H33 119.9 . . ?
C32 C33 C34 120.18(19) . . ?
H33 C33 C34 119.9 . . ?
C33 C34 H34 119.8 . . ?
C33 C34 C35 120.44(19) . . ?
H34 C34 C35 119.8 . . ?
C34 C35 C36 120.12(18) . . ?
C34 C35 C40 119.99(18) . . ?
C36 C35 C40 119.89(18) . . ?
C31 C36 C35 117.49(17) . . ?
C31 C36 C37 125.41(17) . . ?
C35 C36 C37 117.06(17) . . ?
N12 C37 C36 117.87(17) . . ?
N12 C37 C38 120.39(18) . . ?
C36 C37 C38 121.70(18) . . ?
C37 C38 H38 119.9 . . ?
C37 C38 C39 120.19(19) . . ?
H38 C38 C39 119.9 . . ?
C38 C39 H39 119.8 . . ?
C38 C39 C40 120.3(2) . . ?
H39 C39 C40 119.8 . . ?
C35 C40 C39 120.80(19) . . ?
C35 C40 H40 119.6 . . ?
C39 C40 H40 119.6 . . ?
N11 C41 H41A 109.5 . . ?
N11 C41 H41B 109.5 . . ?
N11 C41 H41C 109.5 . . ?
H41A C41 H41B 109.5 . . ?
H41A C41 H41C 109.5 . . ?
H41B C41 H41C 109.5 . . ?
N11 C42 H42A 109.5 . . ?
N11 C42 H42B 109.5 . . ?
N11 C42 H42C 109.5 . . ?
H42A C42 H42B 109.5 . . ?
H42A C42 H42C 109.5 . . ?
H42B C42 H42C 109.5 . . ?
N12 C43 H43A 109.5 . . ?
N12 C43 H43B 109.5 . . ?
N12 C43 H43C 109.5 . . ?
H43A C43 H43B 109.5 . . ?
H43A C43 H43C 109.5 . . ?
H43B C43 H43C 109.5 . . ?
N12 C44 H44A 109.5 . . ?
N12 C44 H44B 109.5 . . ?
N12 C44 H44C 109.5 . . ?
H44A C44 H44B 109.5 . . ?
H44A C44 H44C 109.5 . . ?
H44B C44 H44C 109.5 . . ?
C45 N13 C55 113.22(15) . . ?
C45 N13 C56 111.66(14) . . ?
C55 N13 C56 111.76(16) . . ?
H14N N14 C51 99.3(12) . . ?
H14N N14 C57 110.1(12) . . ?
H14N N14 C58 110.7(12) . . ?
C51 N14 C57 111.28(14) . . ?
C51 N14 C58 112.96(14) . . ?
C57 N14 C58 111.77(16) . . ?
N13 C45 C46 121.21(17) . . ?
N13 C45 C50 117.76(16) . . ?
C46 C45 C50 121.02(17) . . ?
C45 C46 H46 119.7 . . ?
C45 C46 C47 120.69(19) . . ?
H46 C46 C47 119.7 . . ?
C46 C47 H47 120.0 . . ?
C46 C47 C48 120.07(18) . . ?
H47 C47 C48 120.0 . . ?
C47 C48 H48 119.5 . . ?
C47 C48 C49 121.06(18) . . ?
H48 C48 C49 119.5 . . ?
C48 C49 C50 119.27(18) . . ?
C48 C49 C54 120.75(17) . . ?
C50 C49 C54 119.98(18) . . ?
C45 C50 C49 117.88(17) . . ?
C45 C50 C51 125.53(16) . . ?
C49 C50 C51 116.58(17) . . ?
N14 C51 C50 118.80(16) . . ?
N14 C51 C52 119.06(17) . . ?
C50 C51 C52 122.13(17) . . ?
C51 C52 H52 119.7 . . ?
C51 C52 C53 120.50(18) . . ?
H52 C52 C53 119.7 . . ?
C52 C53 H53 120.1 . . ?
C52 C53 C54 119.76(19) . . ?
H53 C53 C54 120.1 . . ?
C49 C54 C53 121.01(18) . . ?
C49 C54 H54 119.5 . . ?
C53 C54 H54 119.5 . . ?
N13 C55 H55A 109.5 . . ?
N13 C55 H55B 109.5 . . ?
N13 C55 H55C 109.5 . . ?
H55A C55 H55B 109.5 . . ?
H55A C55 H55C 109.5 . . ?
H55B C55 H55C 109.5 . . ?
N13 C56 H56A 109.5 . . ?
N13 C56 H56B 109.5 . . ?
N13 C56 H56C 109.5 . . ?
H56A C56 H56B 109.5 . . ?
H56A C56 H56C 109.5 . . ?
H56B C56 H56C 109.5 . . ?
N14 C57 H57A 109.5 . . ?
N14 C57 H57B 109.5 . . ?
N14 C57 H57C 109.5 . . ?
H57A C57 H57B 109.5 . . ?
H57A C57 H57C 109.5 . . ?
H57B C57 H57C 109.5 . . ?
N14 C58 H58A 109.5 . . ?
N14 C58 H58B 109.5 . . ?
N14 C58 H58C 109.5 . . ?
H58A C58 H58B 109.5 . . ?
H58A C58 H58C 109.5 . . ?
H58B C58 H58C 109.5 . . ?
H15N N15 C59 100.2(14) . . ?
H15N N15 C69 111.2(14) . . ?
H15N N15 C70 110.1(14) . . ?
C59 N15 C69 112.67(14) . . ?
C59 N15 C70 111.40(14) . . ?
C69 N15 C70 110.81(15) . . ?
C65 N16 C71 113.10(15) . . ?
C65 N16 C72 110.95(15) . . ?
C71 N16 C72 110.80(15) . . ?
N15 C59 C60 119.05(17) . . ?
N15 C59 C64 118.94(16) . . ?
C60 C59 C64 122.01(17) . . ?
C59 C60 H60 119.9 . . ?
C59 C60 C61 120.17(19) . . ?
H60 C60 C61 119.9 . . ?
C60 C61 H61 119.9 . . ?
C60 C61 C62 120.22(18) . . ?
H61 C61 C62 119.9 . . ?
C61 C62 H62 119.6 . . ?
C61 C62 C63 120.87(17) . . ?
H62 C62 C63 119.6 . . ?
C62 C63 C64 119.87(17) . . ?
C62 C63 C68 120.03(17) . . ?
C64 C63 C68 120.10(17) . . ?
C59 C64 C63 116.82(17) . . ?
C59 C64 C65 125.75(16) . . ?
C63 C64 C65 117.43(17) . . ?
N16 C65 C64 118.27(16) . . ?
N16 C65 C66 121.41(17) . . ?
C64 C65 C66 120.31(17) . . ?
C65 C66 H66 119.1 . . ?
C65 C66 C67 121.74(18) . . ?
H66 C66 C67 119.1 . . ?
C66 C67 H67 120.1 . . ?
C66 C67 C68 119.70(18) . . ?
H67 C67 C68 120.1 . . ?
C63 C68 C67 120.70(17) . . ?
C63 C68 H68 119.7 . . ?
C67 C68 H68 119.7 . . ?
N15 C69 H69A 109.5 . . ?
N15 C69 H69B 109.5 . . ?
N15 C69 H69C 109.5 . . ?
H69A C69 H69B 109.5 . . ?
H69A C69 H69C 109.5 . . ?
H69B C69 H69C 109.5 . . ?
N15 C70 H70A 109.5 . . ?
N15 C70 H70B 109.5 . . ?
N15 C70 H70C 109.5 . . ?
H70A C70 H70B 109.5 . . ?
H70A C70 H70C 109.5 . . ?
H70B C70 H70C 109.5 . . ?
N16 C71 H71A 109.5 . . ?
N16 C71 H71B 109.5 . . ?
N16 C71 H71C 109.5 . . ?
H71A C71 H71B 109.5 . . ?
H71A C71 H71C 109.5 . . ?
H71B C71 H71C 109.5 . . ?
N16 C72 H72A 109.5 . . ?
N16 C72 H72B 109.5 . . ?
N16 C72 H72C 109.5 . . ?
H72A C72 H72B 109.5 . . ?
H72A C72 H72C 109.5 . . ?
H72B C72 H72C 109.5 . . ?
H13O O13 C73 109.5 . . ?
O13 C73 H73A 109.5 . . ?
O13 C73 H73B 109.5 . . ?
O13 C73 H73C 109.5 . . ?
H73A C73 H73B 109.5 . . ?
H73A C73 H73C 109.5 . . ?
H73B C73 H73C 109.5 . . ?
H14O O14 C74 109.5 . . ?
O14 C74 H74A 109.5 . . ?
O14 C74 H74B 109.5 . . ?
O14 C74 H74C 109.5 . . ?
H74A C74 H74B 109.5 . . ?
H74A C74 H74C 109.5 . . ?
H74B C74 H74C 109.5 . . ?
H15O O15 C75 109.5 . . ?
O15 C75 H75A 109.5 . . ?
O15 C75 H75B 109.5 . . ?
O15 C75 H75C 109.5 . . ?
H75A C75 H75B 109.5 . . ?
H75A C75 H75C 109.5 . . ?
H75B C75 H75C 109.5 . . ?

loop_
 _geom_torsion_atom_site_label_1
 _geom_torsion_atom_site_label_2
 _geom_torsion_atom_site_label_3
 _geom_torsion_atom_site_label_4
 _geom_torsion
 _geom_torsion_site_symmetry_1
 _geom_torsion_site_symmetry_2
 _geom_torsion_site_symmetry_3
 _geom_torsion_site_symmetry_4
 _geom_torsion_publ_flag
C2 N1 C1 O1 177.91(18) . . . . ?
C2 N1 C1 C4 -2.2(3) . . . . ?
C3 N2 C2 O2 -179.19(18) . . . . ?
C3 N2 C2 N1 0.8(3) . . . . ?
C1 N1 C2 O2 -179.27(18) . . . . ?
C1 N1 C2 N2 0.8(3) . . . . ?
C2 N2 C3 O3 179.78(18) . . . . ?
C2 N2 C3 C4 -0.7(3) . . . . ?
O1 C1 C4 C3 -177.93(19) . . . . ?
N1 C1 C4 C3 2.2(3) . . . . ?
O3 C3 C4 C1 178.59(19) . . . . ?
N2 C3 C4 C1 -0.8(3) . . . . ?
C6 N3 C5 O4 -178.49(17) . . . . ?
C6 N3 C5 C8 1.7(3) . . . . ?
C5 N3 C6 O5 -179.54(18) . . . . ?
C5 N3 C6 N4 0.5(3) . . . . ?
C7 N4 C6 O5 176.89(18) . . . . ?
C7 N4 C6 N3 -3.2(3) . . . . ?
C6 N4 C7 O6 -176.41(17) . . . . ?
C6 N4 C7 C8 3.3(3) . . . . ?
O4 C5 C8 C7 178.70(19) . . . . ?
N3 C5 C8 C7 -1.5(3) . . . . ?
O6 C7 C8 C5 178.93(19) . . . . ?
N4 C7 C8 C5 -0.8(3) . . . . ?
C10 N5 C9 O7 177.96(18) . . . . ?
C10 N5 C9 C12 -1.7(3) . . . . ?
C11 N6 C10 O8 178.72(19) . . . . ?
C11 N6 C10 N5 -1.6(3) . . . . ?
C9 N5 C10 O8 -176.68(19) . . . . ?
C9 N5 C10 N6 3.7(3) . . . . ?
C10 N6 C11 O9 177.90(18) . . . . ?
C10 N6 C11 C12 -2.2(3) . . . . ?
O7 C9 C12 C11 177.87(19) . . . . ?
N5 C9 C12 C11 -2.5(3) . . . . ?
O9 C11 C12 C9 -175.80(18) . . . . ?
N6 C11 C12 C9 4.3(3) . . . . ?
C14 N7 C13 O10 177.87(18) . . . . ?
C14 N7 C13 C16 -2.0(3) . . . . ?
C15 N8 C14 O11 178.41(19) . . . . ?
C15 N8 C14 N7 -1.4(3) . . . . ?
C13 N7 C14 O11 -177.23(19) . . . . ?
C13 N7 C14 N8 2.6(3) . . . . ?
C14 N8 C15 O12 179.42(18) . . . . ?
C14 N8 C15 C16 -0.2(3) . . . . ?
O10 C13 C16 C15 -179.70(19) . . . . ?
N7 C13 C16 C15 0.1(3) . . . . ?
O12 C15 C16 C13 -178.7(2) . . . . ?
N8 C15 C16 C13 0.9(3) . . . . ?
C27 N9 C17 C18 58.8(2) . . . . ?
C27 N9 C17 C22 -124.28(19) . . . . ?
C28 N9 C17 C18 -67.3(2) . . . . ?
C28 N9 C17 C22 109.56(19) . . . . ?
N9 C17 C18 C19 175.70(17) . . . . ?
C22 C17 C18 C19 -1.1(3) . . . . ?
C17 C18 C19 C20 -0.5(3) . . . . ?
C18 C19 C20 C21 1.4(3) . . . . ?
C19 C20 C21 C22 -0.8(3) . . . . ?
C19 C20 C21 C26 -179.57(18) . . . . ?
N9 C17 C22 C21 -175.16(16) . . . . ?
N9 C17 C22 C23 5.4(3) . . . . ?
C18 C17 C22 C21 1.7(3) . . . . ?
C18 C17 C22 C23 -177.81(18) . . . . ?
C20 C21 C22 C17 -0.7(3) . . . . ?
C20 C21 C22 C23 178.77(17) . . . . ?
C26 C21 C22 C17 178.07(17) . . . . ?
C26 C21 C22 C23 -2.4(3) . . . . ?
C17 C22 C23 N10 0.7(3) . . . . ?
C17 C22 C23 C24 -179.38(18) . . . . ?
C21 C22 C23 N10 -178.81(16) . . . . ?
C21 C22 C23 C24 1.2(3) . . . . ?
C29 N10 C23 C22 -122.04(19) . . . . ?
C29 N10 C23 C24 58.0(2) . . . . ?
C30 N10 C23 C22 111.50(19) . . . . ?
C30 N10 C23 C24 -68.5(2) . . . . ?
N10 C23 C24 C25 -179.35(17) . . . . ?
C22 C23 C24 C25 0.7(3) . . . . ?
C23 C24 C25 C26 -1.3(3) . . . . ?
C24 C25 C26 C21 0.0(3) . . . . ?
C20 C21 C26 C25 -179.31(19) . . . . ?
C22 C21 C26 C25 1.9(3) . . . . ?
C41 N11 C31 C32 -69.4(2) . . . . ?
C41 N11 C31 C36 110.27(19) . . . . ?
C42 N11 C31 C32 57.4(2) . . . . ?
C42 N11 C31 C36 -122.94(19) . . . . ?
N11 C31 C32 C33 178.21(18) . . . . ?
C36 C31 C32 C33 -1.4(3) . . . . ?
C31 C32 C33 C34 0.0(3) . . . . ?
C32 C33 C34 C35 1.1(3) . . . . ?
C33 C34 C35 C36 -0.7(3) . . . . ?
C33 C34 C35 C40 178.35(19) . . . . ?
N11 C31 C36 C35 -177.88(15) . . . . ?
N11 C31 C36 C37 4.5(3) . . . . ?
C32 C31 C36 C35 1.8(3) . . . . ?
C32 C31 C36 C37 -175.83(18) . . . . ?
C34 C35 C36 C31 -0.7(3) . . . . ?
C34 C35 C36 C37 177.07(16) . . . . ?
C40 C35 C36 C31 -179.76(17) . . . . ?
C40 C35 C36 C37 -2.0(3) . . . . ?
C31 C36 C37 N12 1.0(3) . . . . ?
C31 C36 C37 C38 178.70(18) . . . . ?
C35 C36 C37 N12 -176.65(15) . . . . ?
C35 C36 C37 C38 1.1(3) . . . . ?
C43 N12 C37 C36 -118.07(19) . . . . ?
C43 N12 C37 C38 64.2(2) . . . . ?
C44 N12 C37 C36 114.74(19) . . . . ?
C44 N12 C37 C38 -63.0(2) . . . . ?
N12 C37 C38 C39 178.18(18) . . . . ?
C36 C37 C38 C39 0.5(3) . . . . ?
C37 C38 C39 C40 -1.3(3) . . . . ?
C38 C39 C40 C35 0.4(3) . . . . ?
C34 C35 C40 C39 -177.77(19) . . . . ?
C36 C35 C40 C39 1.3(3) . . . . ?
C55 N13 C45 C46 51.0(2) . . . . ?
C55 N13 C45 C50 -130.09(18) . . . . ?
C56 N13 C45 C46 -76.2(2) . . . . ?
C56 N13 C45 C50 102.72(19) . . . . ?
N13 C45 C46 C47 178.70(17) . . . . ?
C50 C45 C46 C47 -0.2(3) . . . . ?
C45 C46 C47 C48 -1.0(3) . . . . ?
C46 C47 C48 C49 1.1(3) . . . . ?
C47 C48 C49 C50 -0.2(3) . . . . ?
C47 C48 C49 C54 -179.46(18) . . . . ?
N13 C45 C50 C49 -177.82(15) . . . . ?
N13 C45 C50 C51 2.8(3) . . . . ?
C46 C45 C50 C49 1.1(3) . . . . ?
C46 C45 C50 C51 -178.31(18) . . . . ?
C48 C49 C50 C45 -0.9(3) . . . . ?
C48 C49 C50 C51 178.52(17) . . . . ?
C54 C49 C50 C45 178.38(17) . . . . ?
C54 C49 C50 C51 -2.2(3) . . . . ?
C45 C50 C51 N14 3.0(3) . . . . ?
C45 C50 C51 C52 -178.42(18) . . . . ?
C49 C50 C51 N14 -176.45(15) . . . . ?
C49 C50 C51 C52 2.2(3) . . . . ?
C57 N14 C51 C50 115.03(19) . . . . ?
C57 N14 C51 C52 -63.6(2) . . . . ?
C58 N14 C51 C50 -118.28(19) . . . . ?
C58 N14 C51 C52 63.1(2) . . . . ?
N14 C51 C52 C53 177.80(17) . . . . ?
C50 C51 C52 C53 -0.8(3) . . . . ?
C51 C52 C53 C54 -0.6(3) . . . . ?
C52 C53 C54 C49 0.6(3) . . . . ?
C48 C49 C54 C53 -179.84(18) . . . . ?
C50 C49 C54 C53 0.9(3) . . . . ?
C69 N15 C59 C60 -58.8(2) . . . . ?
C69 N15 C59 C64 122.15(18) . . . . ?
C70 N15 C59 C60 66.4(2) . . . . ?
C70 N15 C59 C64 -112.58(19) . . . . ?
N15 C59 C60 C61 -176.63(17) . . . . ?
C64 C59 C60 C61 2.4(3) . . . . ?
C59 C60 C61 C62 -1.2(3) . . . . ?
C60 C61 C62 C63 -0.8(3) . . . . ?
C61 C62 C63 C64 1.7(3) . . . . ?
C61 C62 C63 C68 -178.39(18) . . . . ?
N15 C59 C64 C63 177.53(15) . . . . ?
N15 C59 C64 C65 -2.6(3) . . . . ?
C60 C59 C64 C63 -1.5(3) . . . . ?
C60 C59 C64 C65 178.37(18) . . . . ?
C62 C63 C64 C59 -0.5(3) . . . . ?
C62 C63 C64 C65 179.61(17) . . . . ?
C68 C63 C64 C59 179.51(17) . . . . ?
C68 C63 C64 C65 -0.3(3) . . . . ?
C59 C64 C65 N16 3.1(3) . . . . ?
C59 C64 C65 C66 -178.13(18) . . . . ?
C63 C64 C65 N16 -177.08(16) . . . . ?
C63 C64 C65 C66 1.7(3) . . . . ?
C71 N16 C65 C64 -124.76(18) . . . . ?
C71 N16 C65 C66 56.5(2) . . . . ?
C72 N16 C65 C64 110.04(19) . . . . ?
C72 N16 C65 C66 -68.7(2) . . . . ?
N16 C65 C66 C67 176.92(17) . . . . ?
C64 C65 C66 C67 -1.8(3) . . . . ?
C65 C66 C67 C68 0.5(3) . . . . ?
C66 C67 C68 C63 0.9(3) . . . . ?
C62 C63 C68 C67 179.09(18) . . . . ?
C64 C63 C68 C67 -1.0(3) . . . . ?

loop_
 _geom_hbond_atom_site_label_D
 _geom_hbond_atom_site_label_H
 _geom_hbond_atom_site_label_A
 _geom_hbond_distance_DH
 _geom_hbond_distance_HA
 _geom_hbond_distance_DA
 _geom_hbond_angle_DHA
 _geom_hbond_site_symmetry_A
N1 H1N O10  0.90(2) 2.00(2) 2.894(2) 180(2) 1_545
N2 H2N O6  0.90(2) 1.87(2) 2.767(2) 173(2) .
N3 H3N O7  0.91(2) 1.87(2) 2.775(2) 175(2) .
N4 H4N O3  0.90(2) 2.00(2) 2.900(2) 176(2) .
N5 H5N O4  0.90(2) 2.08(2) 2.970(2) 170(2) .
N6 H6N O12  0.94(2) 1.86(2) 2.797(2) 175(2) .
N7 H7N O1  0.90(2) 1.96(2) 2.860(2) 175(2) 1_565
N8 H8N O9  0.94(2) 1.98(2) 2.920(2) 177(2) .
N9 H9N N10  1.23(3) 1.40(3) 2.600(2) 163(2) .
N12 H11N N11  1.18(3) 1.43(3) 2.588(2) 165(2) .
N14 H14N N13  1.06(2) 1.59(2) 2.612(2) 160.3(19) .
N15 H15N N16  1.09(3) 1.59(3) 2.639(2) 159(2) .
O13 H13O O9  0.84 2.03 2.856(2) 170.1 .
O14 H14O O13  0.84 1.95 2.770(2) 164.8 .
O15 H15O O1  0.84 1.90 2.721(2) 164.0 2_656
C28 H28B O5  0.98 2.43 3.189(3) 133.5 .
C29 H29B O5  0.98 2.49 3.206(3) 129.4 .
C33 H33 N3  0.95 2.55 3.354(3) 142.4 1_655
C38 H38 O7  0.95 2.57 3.432(3) 150.7 .
C42 H42C O15  0.98 2.43 3.360(3) 158.8 .
C43 H43C O8  0.98 2.55 3.294(3) 132.2 3_667
C44 H44A O15  0.98 2.34 3.289(3) 162.5 .
C55 H55B O2  0.98 2.54 3.219(3) 126.0 4_565
C57 H57B O2  0.98 2.49 3.122(3) 121.7 4_565
C62 H62 O3  0.95 2.54 3.411(2) 151.7 2_656
C69 H69A O8  0.98 2.43 3.293(3) 146.8 3_667
C69 H69B O4  0.98 2.51 3.163(2) 123.5 3_667
C69 H69C O12  0.98 2.49 3.458(3) 171.5 1_655
C71 H71B O4  0.98 2.58 3.220(2) 123.1 3_667
C75 H75B O11  0.98 2.38 3.309(3) 158.5 2_646

_diffrn_measured_fraction_theta_max    0.994
_diffrn_reflns_theta_full              26.00
_diffrn_measured_fraction_theta_full   0.994
_refine_diff_density_max    0.409
_refine_diff_density_min   -0.295
_refine_diff_density_rms    0.058

#===END


data_4

#LOCAL NAME GSN91 

_audit_creation_method            SHELXL-97
_chemical_name_systematic
;
1-dimethylammonium,8-dimethylaminonaphthalene ororate
;
_chemical_name_common             ?
_chemical_melting_point           ?
_chemical_formula_moiety
'C14 H19 N2 +, C5 H3 N2 O4'
_chemical_formula_sum
 'C19 H22 N4 O4'
_chemical_formula_weight          370.41
_chemical_absolute_configuration  unk

loop_
 _atom_type_symbol
 _atom_type_description
 _atom_type_scat_dispersion_real
 _atom_type_scat_dispersion_imag
 _atom_type_scat_source
 'C'  'C'   0.0033   0.0016
 'International Tables Vol C Tables 4.2.6.8 and 6.1.1.4'
 'H'  'H'   0.0000   0.0000
 'International Tables Vol C Tables 4.2.6.8 and 6.1.1.4'
 'N'  'N'   0.0061   0.0033
 'International Tables Vol C Tables 4.2.6.8 and 6.1.1.4'
 'O'  'O'   0.0106   0.0060
 'International Tables Vol C Tables 4.2.6.8 and 6.1.1.4'

_symmetry_cell_setting            monoclinic
_symmetry_space_group_name_H-M    'P 21'
_symmetry_space_group_name_Hall   'P 2yb'

loop_
 _symmetry_equiv_pos_as_xyz
 'x, y, z'
 '-x, y+1/2, -z'

_cell_length_a                    25.641(7)
_cell_length_b                    11.581(2)
_cell_length_c                    27.303(8)
_cell_angle_alpha                 90.00
_cell_angle_beta                  106.598(16)
_cell_angle_gamma                 90.00
_cell_volume                      7770(3)
_cell_formula_units_Z             16
_cell_measurement_temperature     150(2)
_cell_measurement_reflns_used     28494
_cell_measurement_theta_min       2.2
_cell_measurement_theta_max       25.0

_exptl_crystal_description        block
_exptl_crystal_colour             colourless
_exptl_crystal_size_max           0.51
_exptl_crystal_size_mid           0.43
_exptl_crystal_size_min           0.32
_exptl_crystal_density_meas       ?
_exptl_crystal_density_diffrn     1.267
_exptl_crystal_density_method     'not measured'
_exptl_crystal_F_000              3136
_exptl_absorpt_coefficient_mu     0.091
_exptl_absorpt_correction_type    multi-scan
_exptl_absorpt_correction_T_min   0.8991
_exptl_absorpt_correction_T_max   0.9715
_exptl_absorpt_process_details    'SADABS; Sheldrick 2003'

_exptl_special_details
;
Heaviest atom is O therefore Flack parameter is meaningless so Friedel 
opposites were merged during final refinement cycles.  The largest
residual electron density peak is 1.86 \%A away from C138, the closest
non-hydrogen atom.
;

_diffrn_ambient_temperature       150(2)
_diffrn_radiation_wavelength      0.71073
_diffrn_radiation_type            MoK\a
_diffrn_radiation_source          'sealed tube'
_diffrn_radiation_monochromator   graphite
_diffrn_measurement_device_type   'Bruker SMART 1K CCD diffractometer'
_diffrn_measurement_method        'thin-slice \w scans'
_diffrn_detector_area_resol_mean  ?
_diffrn_standards_number          0
_diffrn_standards_interval_count  ?
_diffrn_standards_interval_time   ?
_diffrn_standards_decay_%         ?
_diffrn_reflns_number             56638
_diffrn_reflns_av_R_equivalents   0.0567
_diffrn_reflns_av_sigmaI/netI     0.0560
_diffrn_reflns_limit_h_min        -30
_diffrn_reflns_limit_h_max        30
_diffrn_reflns_limit_k_min        -13
_diffrn_reflns_limit_k_max        13
_diffrn_reflns_limit_l_min        -32
_diffrn_reflns_limit_l_max        32
_diffrn_reflns_theta_min          0.78
_diffrn_reflns_theta_max          25.02
_reflns_number_total              14444
_reflns_number_gt                 10802
_reflns_threshold_expression      I>2\s(I)

_computing_data_collection        'Bruker SMART'
_computing_cell_refinement        'Bruker SAINT'
_computing_data_reduction         'Bruker SAINT'
_computing_structure_solution     'Bruker SHELXTL'
_computing_structure_refinement   'Bruker SHELXTL'
_computing_molecular_graphics     'Bruker SHELXTL'
_computing_publication_material   'Bruker SHELXTL and local programs'

_refine_special_details
;
 Refinement of F^2^ against ALL reflections.  The weighted R-factor wR and
 goodness of fit S are based on F^2^, conventional R-factors R are based
 on F, with F set to zero for negative F^2^. The threshold expression of
 F^2^ > 2sigma(F^2^) is used only for calculating R-factors(gt) etc. and is
 not relevant to the choice of reflections for refinement.  R-factors based
 on F^2^ are statistically about twice as large as those based on F, and R-
 factors based on ALL data will be even larger.
;

_refine_ls_structure_factor_coef  Fsqd
_refine_ls_matrix_type            full
_refine_ls_weighting_scheme       calc
_refine_ls_weighting_details
 'calc w=1/[\s^2^(Fo^2^)+(0.0940P)^2^+17.8674P] where P=(Fo^2^+2Fc^2^)/3'
_atom_sites_solution_primary      direct
_atom_sites_solution_secondary    difmap
_atom_sites_solution_hydrogens    difmap
_refine_ls_hydrogen_treatment     mixed
_refine_ls_extinction_method      none
_refine_ls_extinction_coef        ?
_refine_ls_abs_structure_details
 'Flack H D (1983), Acta Cryst. A39, 876-881'
_refine_ls_abs_structure_Flack    ?
_refine_ls_number_reflns          14444
_refine_ls_number_parameters      2001
_refine_ls_number_restraints      913
_refine_ls_R_factor_all           0.1023
_refine_ls_R_factor_gt            0.0802
_refine_ls_wR_factor_ref          0.2212
_refine_ls_wR_factor_gt           0.2090
_refine_ls_goodness_of_fit_ref    1.066
_refine_ls_restrained_S_all       1.033
_refine_ls_shift/su_max           0.009
_refine_ls_shift/su_mean          0.000

loop_
 _atom_site_label
 _atom_site_type_symbol
 _atom_site_fract_x
 _atom_site_fract_y
 _atom_site_fract_z
 _atom_site_U_iso_or_equiv
 _atom_site_adp_type
 _atom_site_occupancy
 _atom_site_symmetry_multiplicity
 _atom_site_calc_flag
 _atom_site_refinement_flags
 _atom_site_disorder_assembly
 _atom_site_disorder_group
O1 O 1.0491(2) 0.4967(6) 0.6580(2) 0.0456(15) Uani 1 1 d . . .
O2 O 0.8919(2) 0.6133(6) 0.5437(2) 0.0449(16) Uani 1 1 d . . .
O3 O 0.9052(2) 0.5131(6) 0.75493(18) 0.0411(14) Uani 1 1 d . . .
O4 O 0.8354(2) 0.5710(9) 0.6925(2) 0.077(3) Uani 1 1 d . . .
N1 N 0.8899(2) 0.5727(6) 0.6244(2) 0.0282(14) Uani 1 1 d . . .
H1 H 0.8544 0.5829 0.6164 0.034 Uiso 1 1 calc R . .
N2 N 0.9699(2) 0.5571(6) 0.6019(2) 0.0311(15) Uani 1 1 d . . .
H2 H 0.9871 0.5620 0.5783 0.037 Uiso 1 1 calc R . .
C1 C 1.0010(3) 0.5218(7) 0.6507(3) 0.0304(17) Uani 1 1 d U . .
C2 C 0.9162(3) 0.5846(7) 0.5874(3) 0.0295(18) Uani 1 1 d . . .
C3 C 0.9711(3) 0.5205(7) 0.6873(3) 0.0302(17) Uani 1 1 d U . .
H3 H 0.9893 0.5021 0.7219 0.036 Uiso 1 1 calc R . .
C4 C 0.9182(3) 0.5448(6) 0.6739(3) 0.0233(15) Uani 1 1 d U . .
C5 C 0.8828(3) 0.5428(7) 0.7118(3) 0.0308(17) Uani 1 1 d U . .
O5 O 0.1803(2) 0.5286(6) 0.69082(19) 0.0396(14) Uani 1 1 d . . .
O6 O 0.27472(19) 0.5650(5) 0.57319(19) 0.0339(13) Uani 1 1 d . . .
O7 O 0.0353(2) 0.5601(7) 0.5367(2) 0.0501(17) Uani 1 1 d . . .
O8 O 0.0734(2) 0.5672(6) 0.4723(2) 0.0500(17) Uani 1 1 d . . .
N3 N 0.1325(2) 0.5417(6) 0.6079(2) 0.0281(14) Uani 1 1 d . . .
H3A H 0.1015 0.5368 0.6156 0.034 Uiso 1 1 calc R . .
N4 N 0.2268(2) 0.5448(6) 0.6314(2) 0.0291(14) Uani 1 1 d . . .
H4 H 0.2580 0.5389 0.6554 0.035 Uiso 1 1 calc R . .
C6 C 0.1793(3) 0.5387(7) 0.6460(3) 0.0317(18) Uani 1 1 d . . .
C7 C 0.2286(3) 0.5595(7) 0.5815(3) 0.0269(16) Uani 1 1 d U . .
C8 C 0.1770(3) 0.5612(7) 0.5421(3) 0.0248(15) Uani 1 1 d U . .
H8 H 0.1755 0.5683 0.5071 0.030 Uiso 1 1 calc R . .
C9 C 0.1311(3) 0.5523(7) 0.5568(3) 0.0281(16) Uani 1 1 d U . .
C10 C 0.0746(3) 0.5596(8) 0.5188(3) 0.0317(18) Uani 1 1 d U . .
O9 O 0.3887(2) 0.5712(6) 0.54220(19) 0.0462(16) Uani 1 1 d . . .
O10 O 0.5511(2) 0.5581(8) 0.6631(2) 0.060(2) Uani 1 1 d . . .
O11 O 0.4033(2) 0.5736(8) 0.7590(2) 0.063(2) Uani 1 1 d . . .
O12 O 0.3319(2) 0.5331(8) 0.6925(2) 0.066(2) Uani 1 1 d . . .
N5 N 0.3880(2) 0.5624(5) 0.6248(2) 0.0253(13) Uani 1 1 d . . .
H5 H 0.3522 0.5624 0.6161 0.030 Uiso 1 1 calc R . .
N6 N 0.4698(2) 0.5618(6) 0.6037(2) 0.0281(14) Uani 1 1 d . . .
H6 H 0.4867 0.5607 0.5798 0.034 Uiso 1 1 calc R . .
C11 C 0.4132(3) 0.5649(7) 0.5878(3) 0.0273(16) Uani 1 1 d . . .
C12 C 0.5020(3) 0.5605(8) 0.6544(3) 0.0350(18) Uani 1 1 d U . .
C13 C 0.4708(3) 0.5592(8) 0.6914(3) 0.0371(19) Uani 1 1 d U . .
H13 H 0.4894 0.5581 0.7269 0.045 Uiso 1 1 calc R . .
C14 C 0.4164(3) 0.5598(7) 0.6761(3) 0.0304(17) Uani 1 1 d U . .
C15 C 0.3797(3) 0.5567(9) 0.7129(3) 0.043(2) Uani 1 1 d U . .
O13 O 0.6851(2) 0.5680(4) 0.69394(17) 0.0268(11) Uani 1 1 d . . .
O14 O 0.7744(2) 0.5679(4) 0.57293(18) 0.0291(12) Uani 1 1 d . . .
O15 O 0.5737(2) 0.5382(7) 0.4756(2) 0.0501(17) Uani 1 1 d . . .
O16 O 0.5376(2) 0.5464(7) 0.5411(2) 0.0507(17) Uani 1 1 d . . .
N7 N 0.6352(2) 0.5605(5) 0.6097(2) 0.0208(12) Uani 1 1 d . . .
H7 H 0.6044 0.5597 0.6179 0.025 Uiso 1 1 calc R . .
N8 N 0.7291(2) 0.5666(5) 0.6324(2) 0.0236(13) Uani 1 1 d . . .
H8A H 0.7605 0.5677 0.6563 0.028 Uiso 1 1 calc R . .
C16 C 0.6836(3) 0.5661(6) 0.6488(3) 0.0242(16) Uani 1 1 d . . .
C17 C 0.7313(3) 0.5658(6) 0.5825(3) 0.0213(14) Uani 1 1 d U . .
C18 C 0.6790(3) 0.5574(6) 0.5447(2) 0.0213(14) Uani 1 1 d U . .
H18 H 0.6770 0.5527 0.5095 0.026 Uiso 1 1 calc R . .
C19 C 0.6333(3) 0.5561(6) 0.5592(3) 0.0220(14) Uani 1 1 d U . .
C20 C 0.5755(3) 0.5458(7) 0.5205(3) 0.0320(18) Uani 1 1 d U . .
O17 O 0.6328(2) 0.1341(7) 0.9318(2) 0.0559(19) Uani 1 1 d . . .
O18 O 0.72469(18) 0.1026(5) 0.81333(18) 0.0281(12) Uani 1 1 d . . .
O19 O 0.5231(2) 0.0512(7) 0.71629(19) 0.057(2) Uani 1 1 d . . .
O20 O 0.4869(2) 0.0513(6) 0.78203(19) 0.0446(16) Uani 1 1 d . . .
N9 N 0.5841(2) 0.0935(6) 0.8497(2) 0.0281(15) Uani 1 1 d . . .
H9 H 0.5537 0.0905 0.8584 0.034 Uiso 1 1 calc R . .
N10 N 0.6772(2) 0.1174(5) 0.8714(2) 0.0266(14) Uani 1 1 d . . .
H10 H 0.7081 0.1318 0.8949 0.032 Uiso 1 1 calc R . .
C21 C 0.6314(3) 0.1146(8) 0.8872(3) 0.0302(18) Uani 1 1 d . . .
C22 C 0.6802(3) 0.1001(6) 0.8225(2) 0.0218(15) Uani 1 1 d U . .
C23 C 0.6280(3) 0.0829(6) 0.7846(3) 0.0221(15) Uani 1 1 d U . .
H23 H 0.6264 0.0760 0.7495 0.026 Uiso 1 1 calc R . .
C24 C 0.5813(3) 0.0766(6) 0.7988(2) 0.0233(15) Uani 1 1 d U . .
C25 C 0.5252(3) 0.0576(7) 0.7622(3) 0.0310(17) Uani 1 1 d U . .
O21 O 0.83911(19) 0.0545(5) 0.78692(16) 0.0308(12) Uani 1 1 d . . .
O22 O 1.00325(19) 0.1289(5) 0.90280(19) 0.0379(14) Uani 1 1 d . . .
O23 O 0.85992(19) 0.1775(5) 0.99925(17) 0.0355(13) Uani 1 1 d . . .
O24 O 0.78389(19) 0.1640(6) 0.93296(19) 0.0399(14) Uani 1 1 d . . .
N11 N 0.8398(2) 0.1056(5) 0.8673(2) 0.0211(12) Uani 1 1 d . . .
H11 H 0.8041 0.1028 0.8592 0.025 Uiso 1 1 calc R . .
N12 N 0.9202(2) 0.0925(6) 0.8451(2) 0.0270(14) Uani 1 1 d . . .
H12 H 0.9371 0.0789 0.8218 0.032 Uiso 1 1 calc R . .
C26 C 0.8647(3) 0.0834(6) 0.8301(3) 0.0276(17) Uani 1 1 d . . .
C27 C 0.9530(3) 0.1216(7) 0.8945(3) 0.0280(16) Uani 1 1 d U . .
C28 C 0.9236(3) 0.1368(7) 0.9324(3) 0.0272(16) Uani 1 1 d U . .
H28 H 0.9428 0.1496 0.9672 0.033 Uiso 1 1 calc R . .
C29 C 0.8687(3) 0.1326(6) 0.9175(2) 0.0230(15) Uani 1 1 d U . .
C30 C 0.8349(3) 0.1594(7) 0.9536(3) 0.0288(16) Uani 1 1 d U . .
O25 O 0.1378(2) 0.1156(6) 0.9317(2) 0.0440(15) Uani 1 1 d . . .
O26 O 0.2237(2) 0.0064(6) 0.8158(2) 0.0402(14) Uani 1 1 d . . .
O27 O -0.0121(2) 0.0721(7) 0.7819(2) 0.0510(18) Uani 1 1 d . . .
O28 O 0.0216(2) 0.0541(7) 0.71671(19) 0.0524(18) Uani 1 1 d . . .
N13 N 0.0850(2) 0.0884(5) 0.8485(2) 0.0261(14) Uani 1 1 d . . .
H13A H 0.0544 0.1041 0.8556 0.031 Uiso 1 1 calc R . .
N14 N 0.1786(2) 0.0619(5) 0.8721(2) 0.0244(13) Uani 1 1 d . . .
H14 H 0.2102 0.0605 0.8958 0.029 Uiso 1 1 calc R . .
C31 C 0.1334(3) 0.0909(7) 0.8885(3) 0.0254(16) Uani 1 1 d . . .
C32 C 0.1797(3) 0.0351(7) 0.8231(3) 0.0289(16) Uani 1 1 d U . .
C33 C 0.1279(3) 0.0400(7) 0.7859(3) 0.0283(16) Uani 1 1 d U . .
H33 H 0.1253 0.0267 0.7510 0.034 Uiso 1 1 calc R . .
C34 C 0.0826(3) 0.0634(7) 0.7996(3) 0.0259(15) Uani 1 1 d U . .
C35 C 0.0243(3) 0.0628(8) 0.7616(3) 0.0344(19) Uani 1 1 d U . .
O29 O 0.3395(2) 0.0052(6) 0.78569(19) 0.0458(16) Uani 1 1 d . . .
O30 O 0.5007(2) 0.0844(5) 0.90248(19) 0.0367(14) Uani 1 1 d . . .
O31 O 0.3614(2) 0.0434(6) 1.00246(19) 0.0459(16) Uani 1 1 d . . .
O32 O 0.28451(18) 0.0386(5) 0.93787(17) 0.0276(11) Uani 1 1 d . . .
N15 N 0.3409(2) 0.0277(6) 0.8683(2) 0.0240(13) Uani 1 1 d . . .
H15 H 0.3058 0.0127 0.8608 0.029 Uiso 1 1 calc R . .
N16 N 0.4203(2) 0.0475(6) 0.8457(2) 0.0278(14) Uani 1 1 d . . .
H16 H 0.4373 0.0459 0.8219 0.033 Uiso 1 1 calc R . .
C36 C 0.3639(3) 0.0279(7) 0.8295(3) 0.0311(18) Uani 1 1 d . . .
C37 C 0.4512(3) 0.0683(6) 0.8934(3) 0.0213(14) Uani 1 1 d U . .
C38 C 0.4226(3) 0.0706(6) 0.9318(3) 0.0220(14) Uani 1 1 d U . .
H38 H 0.4418 0.0872 0.9663 0.026 Uiso 1 1 calc R . .
C39 C 0.3681(3) 0.0492(6) 0.9188(2) 0.0176(13) Uani 1 1 d U . .
C40 C 0.3354(3) 0.0447(7) 0.9566(3) 0.0252(16) Uani 1 1 d U . .
N17 N 0.0779(3) 0.9392(7) 0.5749(2) 0.0354(16) Uani 1 1 d . . .
H17N H 0.070(3) 1.037(8) 0.577(3) 0.043 Uiso 1 1 d . . .
N18 N 0.0702(2) 1.1609(6) 0.5899(2) 0.0323(15) Uani 1 1 d . . .
C41 C 0.1316(3) 0.9388(7) 0.6131(3) 0.0305(16) Uani 1 1 d U . .
C42 C 0.1626(3) 0.8435(7) 0.6239(3) 0.0394(19) Uani 1 1 d U . .
H42 H 0.1511 0.7751 0.6046 0.047 Uiso 1 1 calc R . .
C43 C 0.2122(3) 0.8436(8) 0.6637(3) 0.0400(19) Uani 1 1 d U . .
H43 H 0.2333 0.7750 0.6715 0.048 Uiso 1 1 calc R . .
C44 C 0.2294(3) 0.9400(8) 0.6903(3) 0.0343(17) Uani 1 1 d U . .
H44 H 0.2626 0.9388 0.7169 0.041 Uiso 1 1 calc R . .
C45 C 0.2000(3) 1.0410(7) 0.6799(3) 0.0282(15) Uani 1 1 d U . .
C46 C 0.1494(3) 1.0459(7) 0.6395(3) 0.0278(15) Uani 1 1 d U . .
C47 C 0.1228(3) 1.1546(7) 0.6306(3) 0.0293(16) Uani 1 1 d U . .
C48 C 0.1429(3) 1.2516(7) 0.6578(3) 0.0337(17) Uani 1 1 d U . .
H48 H 0.1234 1.3223 0.6504 0.040 Uiso 1 1 calc R . .
C49 C 0.1927(3) 1.2470(8) 0.6970(3) 0.0373(18) Uani 1 1 d U . .
H49 H 0.2071 1.3141 0.7162 0.045 Uiso 1 1 calc R . .
C50 C 0.2191(3) 1.1463(7) 0.7065(3) 0.0299(16) Uani 1 1 d U . .
H50 H 0.2528 1.1445 0.7327 0.036 Uiso 1 1 calc R . .
C51 C 0.0809(4) 0.8979(9) 0.5237(3) 0.049(2) Uani 1 1 d . . .
H51A H 0.1102 0.9386 0.5144 0.074 Uiso 1 1 calc R . .
H51B H 0.0462 0.9135 0.4979 0.074 Uiso 1 1 calc R . .
H51C H 0.0881 0.8147 0.5252 0.074 Uiso 1 1 calc R . .
C52 C 0.0383(3) 0.8733(10) 0.5938(4) 0.053(3) Uani 1 1 d . . .
H52A H 0.0397 0.7916 0.5849 0.079 Uiso 1 1 calc R . .
H52B H 0.0016 0.9034 0.5780 0.079 Uiso 1 1 calc R . .
H52C H 0.0472 0.8812 0.6310 0.079 Uiso 1 1 calc R . .
C53 C 0.0712(4) 1.2398(9) 0.5469(3) 0.046(2) Uani 1 1 d . . .
H53A H 0.0386 1.2271 0.5182 0.068 Uiso 1 1 calc R . .
H53B H 0.1037 1.2239 0.5359 0.068 Uiso 1 1 calc R . .
H53C H 0.0721 1.3202 0.5583 0.068 Uiso 1 1 calc R . .
C54 C 0.0243(3) 1.1930(8) 0.6104(3) 0.038(2) Uani 1 1 d . . .
H54A H 0.0283 1.2737 0.6217 0.056 Uiso 1 1 calc R . .
H54B H 0.0246 1.1431 0.6395 0.056 Uiso 1 1 calc R . .
H54C H -0.0102 1.1835 0.5836 0.056 Uiso 1 1 calc R . .
N19 N 0.5634(2) 0.1606(6) 0.5834(2) 0.0265(14) Uani 1 1 d . . .
H19N H 0.550(3) 0.099(8) 0.580(3) 0.032 Uiso 1 1 d . . .
N20 N 0.5773(2) -0.0620(5) 0.5798(2) 0.0225(12) Uani 1 1 d . . .
C55 C 0.6318(3) -0.0477(6) 0.6165(2) 0.0239(15) Uani 1 1 d U . .
C56 C 0.6656(3) -0.1415(7) 0.6313(3) 0.0369(18) Uani 1 1 d U . .
H56 H 0.6552 -0.2145 0.6157 0.044 Uiso 1 1 calc R . .
C57 C 0.7157(3) -0.1299(7) 0.6696(3) 0.0376(19) Uani 1 1 d U . .
H57 H 0.7387 -0.1951 0.6799 0.045 Uiso 1 1 calc R . .
C58 C 0.7310(3) -0.0260(7) 0.6917(3) 0.0304(16) Uani 1 1 d U . .
H58 H 0.7645 -0.0190 0.7177 0.037 Uiso 1 1 calc R . .
C59 C 0.6977(3) 0.0719(6) 0.6766(2) 0.0214(14) Uani 1 1 d U . .
C60 C 0.6464(3) 0.0625(6) 0.6374(2) 0.0216(14) Uani 1 1 d U . .
C61 C 0.6157(3) 0.1654(6) 0.6231(2) 0.0227(14) Uani 1 1 d U . .
C62 C 0.6336(3) 0.2687(6) 0.6464(3) 0.0306(16) Uani 1 1 d U . .
H62 H 0.6121 0.3361 0.6363 0.037 Uiso 1 1 calc R . .
C63 C 0.6831(3) 0.2763(7) 0.6849(3) 0.0305(16) Uani 1 1 d U . .
H63 H 0.6945 0.3484 0.7010 0.037 Uiso 1 1 calc R . .
C64 C 0.7149(3) 0.1817(6) 0.6994(2) 0.0249(15) Uani 1 1 d U . .
H64 H 0.7488 0.1884 0.7250 0.030 Uiso 1 1 calc R . .
C65 C 0.5401(3) -0.1251(9) 0.6030(3) 0.047(2) Uani 1 1 d . . .
H65A H 0.5026 -0.1179 0.5810 0.070 Uiso 1 1 calc R . .
H65B H 0.5427 -0.0925 0.6367 0.070 Uiso 1 1 calc R . .
H65C H 0.5504 -0.2069 0.6067 0.070 Uiso 1 1 calc R . .
C66 C 0.5787(3) -0.1173(8) 0.5319(3) 0.0373(19) Uani 1 1 d . . .
H66A H 0.6018 -0.0719 0.5160 0.056 Uiso 1 1 calc R . .
H66B H 0.5418 -0.1215 0.5086 0.056 Uiso 1 1 calc R . .
H66C H 0.5937 -0.1954 0.5390 0.056 Uiso 1 1 calc R . .
C67 C 0.5177(3) 0.1917(8) 0.6037(3) 0.0361(19) Uani 1 1 d . . .
H67A H 0.5197 0.1458 0.6344 0.054 Uiso 1 1 calc R . .
H67B H 0.4831 0.1759 0.5778 0.054 Uiso 1 1 calc R . .
H67C H 0.5198 0.2740 0.6125 0.054 Uiso 1 1 calc R . .
C68 C 0.5639(3) 0.2251(7) 0.5366(3) 0.0344(18) Uani 1 1 d . . .
H68A H 0.5314 0.2055 0.5089 0.052 Uiso 1 1 calc R . .
H68B H 0.5965 0.2043 0.5266 0.052 Uiso 1 1 calc R . .
H68C H 0.5642 0.3083 0.5434 0.052 Uiso 1 1 calc R . .
N21 N 0.3845(3) 0.9457(6) 0.6567(2) 0.0296(14) Uani 1 1 d . . .
H21N H 0.389(3) 1.038(8) 0.664(3) 0.036 Uiso 1 1 d . . .
N22 N 0.3736(2) 1.1670(6) 0.6656(2) 0.0297(15) Uani 1 1 d . . .
C69 C 0.3309(3) 0.9455(7) 0.6158(3) 0.0283(15) Uani 1 1 d U . .
C70 C 0.3127(3) 0.8461(8) 0.5904(3) 0.0392(19) Uani 1 1 d U . .
H70 H 0.3332 0.7769 0.5991 0.047 Uiso 1 1 calc R . .
C71 C 0.2631(3) 0.8460(8) 0.5507(3) 0.0395(19) Uani 1 1 d U . .
H71 H 0.2497 0.7764 0.5332 0.047 Uiso 1 1 calc R . .
C72 C 0.2349(3) 0.9450(8) 0.5378(3) 0.0330(16) Uani 1 1 d U . .
H72 H 0.2023 0.9449 0.5103 0.040 Uiso 1 1 calc R . .
C73 C 0.2531(3) 1.0490(7) 0.5644(3) 0.0295(15) Uani 1 1 d U . .
C74 C 0.3031(3) 1.0516(7) 0.6047(2) 0.0247(14) Uani 1 1 d U . .
C75 C 0.3202(3) 1.1596(7) 0.6281(3) 0.0250(15) Uani 1 1 d U . .
C76 C 0.2886(3) 1.2551(7) 0.6151(3) 0.0348(18) Uani 1 1 d U . .
H76 H 0.3000 1.3253 0.6329 0.042 Uiso 1 1 calc R . .
C77 C 0.2396(3) 1.2522(8) 0.5761(3) 0.041(2) Uani 1 1 d U . .
H77 H 0.2188 1.3208 0.5666 0.049 Uiso 1 1 calc R . .
C78 C 0.2217(3) 1.1516(7) 0.5517(3) 0.0297(16) Uani 1 1 d U . .
H78 H 0.1878 1.1497 0.5259 0.036 Uiso 1 1 calc R . .
C79 C 0.3839(4) 0.8712(8) 0.7011(3) 0.045(2) Uani 1 1 d . . .
H79A H 0.3778 0.7907 0.6899 0.068 Uiso 1 1 calc R . .
H79B H 0.3547 0.8964 0.7152 0.068 Uiso 1 1 calc R . .
H79C H 0.4190 0.8776 0.7275 0.068 Uiso 1 1 calc R . .
C80 C 0.4284(3) 0.9122(8) 0.6355(3) 0.0366(19) Uani 1 1 d . . .
H80A H 0.4261 0.8291 0.6283 0.055 Uiso 1 1 calc R . .
H80B H 0.4635 0.9298 0.6602 0.055 Uiso 1 1 calc R . .
H80C H 0.4251 0.9550 0.6038 0.055 Uiso 1 1 calc R . .
C81 C 0.4122(3) 1.2316(8) 0.6435(4) 0.045(2) Uani 1 1 d . . .
H81A H 0.4148 1.1926 0.6125 0.067 Uiso 1 1 calc R . .
H81B H 0.4482 1.2342 0.6686 0.067 Uiso 1 1 calc R . .
H81C H 0.3988 1.3105 0.6351 0.067 Uiso 1 1 calc R . .
C82 C 0.3720(4) 1.2143(8) 0.7150(3) 0.043(2) Uani 1 1 d . . .
H82A H 0.3571 1.2928 0.7101 0.064 Uiso 1 1 calc R . .
H82B H 0.4089 1.2163 0.7384 0.064 Uiso 1 1 calc R . .
H82C H 0.3489 1.1655 0.7295 0.064 Uiso 1 1 calc R . .
N23 N 0.5258(2) 0.6610(6) 0.8718(2) 0.0326(15) Uani 1 1 d . . .
N24 N 0.5035(3) 0.4430(7) 0.8694(2) 0.0326(15) Uani 1 1 d . . .
H24N H 0.511(3) 0.523(8) 0.862(3) 0.039 Uiso 1 1 d . . .
C83 C 0.4971(3) 0.6747(7) 0.9100(3) 0.0373(18) Uani 1 1 d U . .
C84 C 0.4949(4) 0.7793(8) 0.9341(3) 0.0417(19) Uani 1 1 d U . .
H84 H 0.5130 0.8446 0.9255 0.050 Uiso 1 1 calc R . .
C85 C 0.4665(4) 0.7903(8) 0.9709(3) 0.0420(19) Uani 1 1 d U . .
H85 H 0.4648 0.8630 0.9865 0.050 Uiso 1 1 calc R . .
C86 C 0.4419(3) 0.6986(8) 0.9840(3) 0.0402(18) Uani 1 1 d U . .
H86 H 0.4249 0.7064 1.0105 0.048 Uiso 1 1 calc R . .
C87 C 0.4405(3) 0.5920(7) 0.9601(3) 0.0320(16) Uani 1 1 d U . .
C88 C 0.4695(3) 0.5776(7) 0.9251(3) 0.0319(16) Uani 1 1 d U . .
C89 C 0.4685(3) 0.4611(7) 0.9036(3) 0.0326(17) Uani 1 1 d U . .
C90 C 0.4389(3) 0.3770(8) 0.9155(3) 0.042(2) Uani 1 1 d U . .
H90 H 0.4379 0.3035 0.8998 0.051 Uiso 1 1 calc R . .
C91 C 0.4084(4) 0.3946(8) 0.9514(3) 0.046(2) Uani 1 1 d U . .
H91 H 0.3866 0.3341 0.9585 0.055 Uiso 1 1 calc R . .
C92 C 0.4108(3) 0.4963(8) 0.9749(3) 0.0375(18) Uani 1 1 d U . .
H92 H 0.3935 0.5065 1.0011 0.045 Uiso 1 1 calc R . .
C93 C 0.5835(3) 0.6874(9) 0.8909(3) 0.051(2) Uani 1 1 d . . .
H93A H 0.5881 0.7678 0.9025 0.076 Uiso 1 1 calc R . .
H93B H 0.6008 0.6763 0.8635 0.076 Uiso 1 1 calc R . .
H93C H 0.6005 0.6360 0.9195 0.076 Uiso 1 1 calc R . .
C94 C 0.4986(4) 0.7342(8) 0.8255(3) 0.045(2) Uani 1 1 d . . .
H94A H 0.4611 0.7077 0.8107 0.068 Uiso 1 1 calc R . .
H94B H 0.5188 0.7272 0.8001 0.068 Uiso 1 1 calc R . .
H94C H 0.4984 0.8152 0.8360 0.068 Uiso 1 1 calc R . .
C95 C 0.4758(4) 0.3726(9) 0.8219(3) 0.046(2) Uani 1 1 d . . .
H95A H 0.4981 0.3744 0.7981 0.069 Uiso 1 1 calc R . .
H95B H 0.4399 0.4056 0.8052 0.069 Uiso 1 1 calc R . .
H95C H 0.4716 0.2925 0.8317 0.069 Uiso 1 1 calc R . .
C96 C 0.5531(3) 0.3812(8) 0.8989(3) 0.041(2) Uani 1 1 d . . .
H96A H 0.5710 0.4253 0.9298 0.061 Uiso 1 1 calc R . .
H96B H 0.5781 0.3726 0.8779 0.061 Uiso 1 1 calc R . .
H96C H 0.5430 0.3046 0.9086 0.061 Uiso 1 1 calc R . .
N25 N 0.1176(2) 0.4552(6) 0.3484(2) 0.0287(14) Uani 1 1 d . . .
H25N H 0.110(3) 0.567(7) 0.339(3) 0.034 Uiso 1 1 d . . .
N26 N 0.1274(2) 0.6755(5) 0.3412(2) 0.0270(14) Uani 1 1 d . . .
C97 C 0.1701(3) 0.4519(7) 0.3884(3) 0.0260(15) Uani 1 1 d U . .
C98 C 0.1896(3) 0.3537(7) 0.4128(3) 0.0394(19) Uani 1 1 d U . .
H98 H 0.1691 0.2847 0.4037 0.047 Uiso 1 1 calc R . .
C99 C 0.2396(3) 0.3495(7) 0.4516(3) 0.0358(18) Uani 1 1 d U . .
H99 H 0.2523 0.2791 0.4686 0.043 Uiso 1 1 calc R . .
C100 C 0.2698(3) 0.4502(7) 0.4645(3) 0.0288(15) Uani 1 1 d U . .
H100 H 0.3032 0.4491 0.4909 0.035 Uiso 1 1 calc R . .
C101 C 0.2508(3) 0.5557(6) 0.4381(2) 0.0212(13) Uani 1 1 d U . .
C102 C 0.2004(3) 0.5573(7) 0.4002(3) 0.0236(14) Uani 1 1 d U . .
C103 C 0.1820(3) 0.6675(6) 0.3775(3) 0.0227(14) Uani 1 1 d U . .
C104 C 0.2136(3) 0.7637(7) 0.3899(3) 0.0335(17) Uani 1 1 d U . .
H104 H 0.2010 0.8353 0.3739 0.040 Uiso 1 1 calc R . .
C105 C 0.2653(3) 0.7571(7) 0.4268(3) 0.0346(18) Uani 1 1 d U . .
H105 H 0.2882 0.8231 0.4340 0.042 Uiso 1 1 calc R . .
C106 C 0.2817(3) 0.6574(7) 0.4516(3) 0.0321(16) Uani 1 1 d U . .
H106 H 0.3147 0.6555 0.4786 0.039 Uiso 1 1 calc R . .
C107 C 0.1190(3) 0.3927(8) 0.3007(3) 0.039(2) Uani 1 1 d . . .
H10A H 0.1467 0.4276 0.2869 0.058 Uiso 1 1 calc R . .
H10B H 0.0833 0.3985 0.2752 0.058 Uiso 1 1 calc R . .
H10C H 0.1279 0.3113 0.3086 0.058 Uiso 1 1 calc R . .
C108 C 0.0729(3) 0.4131(8) 0.3667(3) 0.040(2) Uani 1 1 d . . .
H10D H 0.0767 0.3296 0.3725 0.060 Uiso 1 1 calc R . .
H10E H 0.0382 0.4294 0.3411 0.060 Uiso 1 1 calc R . .
H10F H 0.0738 0.4520 0.3988 0.060 Uiso 1 1 calc R . .
C109 C 0.1261(3) 0.7274(8) 0.2907(3) 0.039(2) Uani 1 1 d . . .
H10G H 0.1289 0.8116 0.2940 0.058 Uiso 1 1 calc R . .
H10H H 0.0918 0.7070 0.2654 0.058 Uiso 1 1 calc R . .
H10I H 0.1567 0.6977 0.2796 0.058 Uiso 1 1 calc R . .
C110 C 0.0904(3) 0.7385(9) 0.3648(4) 0.046(2) Uani 1 1 d . . .
H11A H 0.0911 0.7021 0.3974 0.069 Uiso 1 1 calc R . .
H11B H 0.0532 0.7359 0.3417 0.069 Uiso 1 1 calc R . .
H11C H 0.1022 0.8190 0.3707 0.069 Uiso 1 1 calc R . .
N27 N 0.7960(2) 0.4608(5) 0.8467(2) 0.0218(12) Uani 1 1 d . . .
H27N H 0.763(3) 0.445(7) 0.904(3) 0.026 Uiso 1 1 d . . .
N28 N 0.7518(2) 0.4822(5) 0.9210(2) 0.0213(13) Uani 1 1 d . . .
C111 C 0.7916(3) 0.5862(6) 0.8400(2) 0.0196(14) Uani 1 1 d U . .
C112 C 0.8106(3) 0.6402(7) 0.8031(3) 0.0296(16) Uani 1 1 d U . .
H112 H 0.8275 0.5954 0.7828 0.036 Uiso 1 1 calc R . .
C113 C 0.8053(3) 0.7590(7) 0.7954(3) 0.0344(17) Uani 1 1 d U . .
H113 H 0.8191 0.7943 0.7703 0.041 Uiso 1 1 calc R . .
C114 C 0.7805(3) 0.8256(7) 0.8237(3) 0.0341(17) Uani 1 1 d U . .
H114 H 0.7757 0.9062 0.8174 0.041 Uiso 1 1 calc R . .
C115 C 0.7620(3) 0.7731(6) 0.8623(2) 0.0217(14) Uani 1 1 d U . .
C116 C 0.7667(3) 0.6539(6) 0.8717(2) 0.0192(13) Uani 1 1 d U . .
C117 C 0.7460(3) 0.6059(6) 0.9102(2) 0.0188(13) Uani 1 1 d U . .
C118 C 0.7212(3) 0.6744(7) 0.9390(3) 0.0327(17) Uani 1 1 d U . .
H118 H 0.7074 0.6414 0.9646 0.039 Uiso 1 1 calc R . .
C119 C 0.7173(3) 0.7919(7) 0.9292(3) 0.0330(17) Uani 1 1 d U . .
H119 H 0.7000 0.8390 0.9485 0.040 Uiso 1 1 calc R . .
C120 C 0.7372(3) 0.8433(7) 0.8928(3) 0.0325(16) Uani 1 1 d U . .
H120 H 0.7346 0.9246 0.8879 0.039 Uiso 1 1 calc R . .
C121 C 0.8523(3) 0.4209(6) 0.8579(3) 0.0271(16) Uani 1 1 d . . .
H12A H 0.8662 0.4377 0.8288 0.041 Uiso 1 1 calc R . .
H12B H 0.8537 0.3375 0.8642 0.041 Uiso 1 1 calc R . .
H12C H 0.8747 0.4609 0.8883 0.041 Uiso 1 1 calc R . .
C122 C 0.7606(3) 0.4019(8) 0.8016(3) 0.038(2) Uani 1 1 d . . .
H12D H 0.7773 0.4054 0.7735 0.057 Uiso 1 1 calc R . .
H12E H 0.7250 0.4401 0.7912 0.057 Uiso 1 1 calc R . .
H12F H 0.7559 0.3210 0.8100 0.057 Uiso 1 1 calc R . .
C123 C 0.6996(3) 0.4231(7) 0.9129(3) 0.0324(18) Uani 1 1 d . . .
H12G H 0.6816 0.4509 0.9380 0.049 Uiso 1 1 calc R . .
H12H H 0.7057 0.3397 0.9172 0.049 Uiso 1 1 calc R . .
H12I H 0.6763 0.4392 0.8783 0.049 Uiso 1 1 calc R . .
C124 C 0.7884(3) 0.4564(8) 0.9729(3) 0.0332(18) Uani 1 1 d . . .
H12J H 0.7685 0.4673 0.9983 0.050 Uiso 1 1 calc R . .
H12K H 0.8198 0.5086 0.9805 0.050 Uiso 1 1 calc R . .
H12L H 0.8010 0.3763 0.9741 0.050 Uiso 1 1 calc R . .
N29 N 0.0296(3) 0.5000(8) 0.8822(2) 0.046(2) Uani 1 1 d . . .
N30 N 0.0016(3) 0.7134(8) 0.8613(3) 0.045(2) Uani 1 1 d . . .
H30N H 0.016(4) 0.653(9) 0.858(4) 0.055 Uiso 1 1 d . . .
C125 C -0.0026(3) 0.5087(8) 0.9215(3) 0.0396(18) Uani 1 1 d U . .
C126 C -0.0024(4) 0.4128(9) 0.9509(3) 0.051(2) Uani 1 1 d U . .
H126 H 0.0175 0.3457 0.9471 0.062 Uiso 1 1 calc R . .
C127 C -0.0338(4) 0.4159(8) 0.9889(3) 0.044(2) Uani 1 1 d U . .
H127 H -0.0355 0.3500 1.0091 0.053 Uiso 1 1 calc R . .
C128 C -0.0583(3) 0.5083(9) 0.9938(3) 0.046(2) Uani 1 1 d U . .
H128 H -0.0772 0.5104 1.0191 0.055 Uiso 1 1 calc R . .
C129 C -0.0593(3) 0.6101(8) 0.9635(3) 0.0409(18) Uani 1 1 d U . .
C130 C -0.0304(3) 0.6111(8) 0.9260(3) 0.0371(17) Uani 1 1 d U . .
C131 C -0.0316(4) 0.7138(9) 0.8951(3) 0.046(2) Uani 1 1 d U . .
C132 C -0.0655(4) 0.8066(10) 0.9012(4) 0.065(3) Uani 1 1 d U . .
H132 H -0.0678 0.8742 0.8810 0.078 Uiso 1 1 calc R . .
C133 C -0.0968(4) 0.7989(10) 0.9380(4) 0.059(2) Uani 1 1 d U . .
H133 H -0.1212 0.8598 0.9392 0.071 Uiso 1 1 calc R . .
C134 C -0.0928(4) 0.7098(9) 0.9705(4) 0.058(2) Uani 1 1 d U . .
H134 H -0.1106 0.7106 0.9967 0.069 Uiso 1 1 calc R . .
C135 C 0.0075(4) 0.4171(9) 0.8430(3) 0.047(2) Uani 1 1 d . . .
H13B H 0.0319 0.4087 0.8214 0.070 Uiso 1 1 calc R . .
H13C H -0.0283 0.4432 0.8222 0.070 Uiso 1 1 calc R . .
H13D H 0.0038 0.3425 0.8586 0.070 Uiso 1 1 calc R . .
C136 C 0.0877(4) 0.4852(11) 0.9086(4) 0.068(3) Uani 1 1 d . . .
H13E H 0.0940 0.4070 0.9228 0.102 Uiso 1 1 calc R . .
H13F H 0.0989 0.5418 0.9363 0.102 Uiso 1 1 calc R . .
H13G H 0.1089 0.4968 0.8843 0.102 Uiso 1 1 calc R . .
C137 C 0.0484(4) 0.7942(11) 0.8848(4) 0.070(3) Uani 1 1 d . . .
H13H H 0.0345 0.8730 0.8848 0.105 Uiso 1 1 calc R . .
H13I H 0.0746 0.7919 0.8648 0.105 Uiso 1 1 calc R . .
H13J H 0.0663 0.7701 0.9200 0.105 Uiso 1 1 calc R . .
C138 C -0.0296(5) 0.7529(12) 0.8088(4) 0.076(4) Uani 1 1 d . . .
H13K H -0.0549 0.6921 0.7918 0.115 Uiso 1 1 calc R . .
H13L H -0.0042 0.7696 0.7889 0.115 Uiso 1 1 calc R . .
H13M H -0.0501 0.8229 0.8114 0.115 Uiso 1 1 calc R . .
N31 N 0.2888(2) 0.6674(6) 0.8361(2) 0.0290(14) Uani 1 1 d . . .
N32 N 0.2493(2) 0.6926(5) 0.9124(2) 0.0229(13) Uani 1 1 d . . .
H32N H 0.279(3) 0.705(7) 0.875(3) 0.027 Uiso 1 1 d . . .
C139 C 0.2869(3) 0.5421(7) 0.8421(3) 0.0311(16) Uani 1 1 d U . .
C140 C 0.3053(3) 0.4669(8) 0.8112(3) 0.0429(19) Uani 1 1 d U . .
H140 H 0.3205 0.4958 0.7857 0.051 Uiso 1 1 calc R . .
C141 C 0.3013(4) 0.3475(7) 0.8183(4) 0.047(2) Uani 1 1 d U . .
H141 H 0.3139 0.2964 0.7969 0.057 Uiso 1 1 calc R . .
C142 C 0.2802(3) 0.3018(7) 0.8544(3) 0.0433(19) Uani 1 1 d U . .
H142 H 0.2783 0.2205 0.8579 0.052 Uiso 1 1 calc R . .
C143 C 0.2614(3) 0.3751(7) 0.8862(3) 0.0336(16) Uani 1 1 d U . .
C144 C 0.2648(3) 0.4987(6) 0.8809(3) 0.0257(15) Uani 1 1 d U . .
C145 C 0.2453(3) 0.5663(6) 0.9152(3) 0.0281(15) Uani 1 1 d U . .
C146 C 0.2234(3) 0.5182(7) 0.9500(3) 0.0342(17) Uani 1 1 d U . .
H146 H 0.2102 0.5665 0.9719 0.041 Uiso 1 1 calc R . .
C147 C 0.2202(3) 0.3983(7) 0.9542(3) 0.0414(19) Uani 1 1 d U . .
H147 H 0.2045 0.3665 0.9788 0.050 Uiso 1 1 calc R . .
C148 C 0.2389(3) 0.3269(8) 0.9240(3) 0.0435(19) Uani 1 1 d U . .
H148 H 0.2372 0.2455 0.9278 0.052 Uiso 1 1 calc R . .
C149 C 0.2494(5) 0.7044(11) 0.7870(3) 0.070(3) Uani 1 1 d . . .
H14A H 0.2559 0.6601 0.7587 0.104 Uiso 1 1 calc R . .
H14B H 0.2542 0.7869 0.7816 0.104 Uiso 1 1 calc R . .
H14C H 0.2122 0.6904 0.7885 0.104 Uiso 1 1 calc R . .
C150 C 0.3440(4) 0.7124(9) 0.8419(4) 0.050(2) Uani 1 1 d . . .
H15A H 0.3691 0.6808 0.8732 0.076 Uiso 1 1 calc R . .
H15B H 0.3437 0.7969 0.8442 0.076 Uiso 1 1 calc R . .
H15C H 0.3560 0.6895 0.8123 0.076 Uiso 1 1 calc R . .
C151 C 0.1953(3) 0.7518(7) 0.9008(3) 0.0375(19) Uani 1 1 d . . .
H15D H 0.1716 0.7228 0.8683 0.056 Uiso 1 1 calc R . .
H15E H 0.2004 0.8352 0.8982 0.056 Uiso 1 1 calc R . .
H15F H 0.1786 0.7362 0.9282 0.056 Uiso 1 1 calc R . .
C152 C 0.2877(4) 0.7388(8) 0.9611(3) 0.042(2) Uani 1 1 d . . .
H15G H 0.2731 0.7221 0.9899 0.063 Uiso 1 1 calc R . .
H15H H 0.2916 0.8225 0.9581 0.063 Uiso 1 1 calc R . .
H15I H 0.3233 0.7019 0.9670 0.063 Uiso 1 1 calc R . .

loop_
 _atom_site_aniso_label
 _atom_site_aniso_U_11
 _atom_site_aniso_U_22
 _atom_site_aniso_U_33
 _atom_site_aniso_U_23
 _atom_site_aniso_U_13
 _atom_site_aniso_U_12
O1 0.029(3) 0.071(4) 0.032(3) 0.000(3) 0.001(2) 0.011(3)
O2 0.025(3) 0.083(5) 0.028(3) 0.019(3) 0.008(2) 0.019(3)
O3 0.039(3) 0.064(4) 0.019(3) 0.000(3) 0.005(2) -0.001(3)
O4 0.013(3) 0.192(10) 0.025(3) 0.001(4) 0.002(2) 0.013(4)
N1 0.024(3) 0.037(4) 0.020(3) -0.001(3) 0.001(3) 0.004(3)
N2 0.018(3) 0.054(4) 0.019(3) -0.004(3) 0.001(2) -0.003(3)
C1 0.018(3) 0.037(4) 0.028(4) 0.001(3) -0.007(3) 0.003(3)
C2 0.020(4) 0.040(5) 0.030(4) 0.000(3) 0.009(3) 0.012(3)
C3 0.020(3) 0.048(5) 0.017(3) -0.005(3) -0.003(3) -0.004(3)
C4 0.023(3) 0.024(4) 0.023(3) -0.001(3) 0.006(3) 0.005(3)
C5 0.029(4) 0.043(5) 0.021(4) -0.002(3) 0.009(3) -0.009(4)
O5 0.025(3) 0.071(4) 0.023(3) -0.007(3) 0.006(2) 0.001(3)
O6 0.018(3) 0.053(4) 0.031(3) -0.003(3) 0.007(2) 0.006(2)
O7 0.023(3) 0.099(5) 0.028(3) -0.002(3) 0.007(2) 0.011(3)
O8 0.031(3) 0.090(5) 0.027(3) 0.000(3) 0.006(2) 0.018(3)
N3 0.017(3) 0.039(4) 0.029(3) -0.002(3) 0.007(3) 0.005(3)
N4 0.018(3) 0.045(4) 0.019(3) -0.003(3) -0.003(2) 0.006(3)
C6 0.036(4) 0.037(5) 0.022(4) -0.005(3) 0.008(3) -0.002(4)
C7 0.025(4) 0.034(4) 0.018(3) -0.002(3) 0.000(3) 0.000(3)
C8 0.018(3) 0.034(4) 0.021(3) -0.003(3) 0.003(3) 0.005(3)
C9 0.023(3) 0.033(4) 0.026(4) -0.003(3) 0.004(3) 0.002(3)
C10 0.017(3) 0.049(5) 0.029(4) 0.002(4) 0.006(3) 0.000(3)
O9 0.024(3) 0.087(5) 0.023(3) 0.012(3) 0.000(2) 0.002(3)
O10 0.021(3) 0.119(6) 0.034(3) 0.001(4) -0.001(2) 0.003(4)
O11 0.037(3) 0.124(7) 0.029(3) -0.022(4) 0.011(3) -0.001(4)
O12 0.018(3) 0.148(8) 0.031(3) 0.016(4) 0.004(2) 0.001(4)
N5 0.016(3) 0.029(3) 0.027(3) 0.007(3) 0.001(2) 0.005(3)
N6 0.017(3) 0.036(4) 0.030(3) -0.002(3) 0.004(3) 0.002(3)
C11 0.017(3) 0.030(4) 0.030(4) -0.003(3) -0.001(3) 0.004(3)
C12 0.022(4) 0.053(5) 0.027(4) -0.011(4) 0.003(3) 0.001(4)
C13 0.023(3) 0.059(5) 0.028(4) -0.004(4) 0.005(3) 0.001(4)
C14 0.019(3) 0.042(4) 0.028(4) -0.013(4) 0.003(3) 0.008(3)
C15 0.027(4) 0.067(6) 0.034(5) -0.009(4) 0.007(3) -0.004(4)
O13 0.033(3) 0.035(3) 0.014(2) 0.004(2) 0.009(2) 0.000(2)
O14 0.030(3) 0.028(3) 0.027(3) -0.003(2) 0.004(2) -0.010(2)
O15 0.027(3) 0.084(5) 0.033(3) -0.017(3) -0.001(2) -0.001(3)
O16 0.020(3) 0.089(5) 0.041(3) -0.007(3) 0.006(2) 0.003(3)
N7 0.013(3) 0.024(3) 0.024(3) 0.002(3) 0.003(2) -0.001(2)
N8 0.027(3) 0.026(3) 0.013(3) -0.001(3) -0.002(2) -0.002(3)
C16 0.021(4) 0.011(3) 0.036(4) 0.003(3) 0.000(3) -0.001(3)
C17 0.022(3) 0.013(3) 0.029(4) 0.002(3) 0.007(3) 0.005(3)
C18 0.023(3) 0.026(4) 0.013(3) -0.001(3) 0.002(3) 0.006(3)
C19 0.017(3) 0.019(3) 0.027(4) -0.004(3) 0.000(3) 0.000(3)
C20 0.032(4) 0.037(5) 0.020(4) -0.009(3) -0.002(3) -0.001(3)
O17 0.032(3) 0.108(6) 0.024(3) -0.023(3) 0.002(2) 0.016(3)
O18 0.013(2) 0.040(3) 0.032(3) 0.000(2) 0.007(2) 0.003(2)
O19 0.035(3) 0.116(6) 0.016(3) -0.007(3) 0.001(2) -0.020(4)
O20 0.018(3) 0.086(5) 0.028(3) 0.002(3) 0.005(2) -0.002(3)
N9 0.018(3) 0.048(4) 0.017(3) -0.009(3) 0.003(2) 0.004(3)
N10 0.018(3) 0.036(4) 0.024(3) -0.004(3) 0.003(2) 0.014(3)
C21 0.024(4) 0.052(5) 0.016(3) -0.004(3) 0.008(3) 0.002(4)
C22 0.026(4) 0.018(3) 0.020(3) 0.001(3) 0.003(3) 0.003(3)
C23 0.020(3) 0.020(4) 0.024(3) -0.004(3) 0.001(3) -0.001(3)
C24 0.022(3) 0.028(4) 0.018(3) 0.001(3) 0.003(3) 0.005(3)
C25 0.022(3) 0.042(5) 0.025(4) 0.004(4) 0.001(3) 0.006(3)
O21 0.024(3) 0.054(3) 0.012(2) -0.008(2) 0.002(2) -0.008(2)
O22 0.016(3) 0.066(4) 0.032(3) -0.006(3) 0.006(2) 0.003(3)
O23 0.027(3) 0.062(4) 0.014(2) -0.005(2) 0.000(2) 0.009(3)
O24 0.017(3) 0.068(4) 0.030(3) -0.010(3) 0.001(2) 0.004(3)
N11 0.018(3) 0.026(3) 0.017(3) -0.001(2) 0.001(2) -0.003(2)
N12 0.015(3) 0.047(4) 0.019(3) 0.006(3) 0.004(2) -0.001(3)
C26 0.022(4) 0.028(4) 0.037(4) 0.009(3) 0.015(3) -0.001(3)
C27 0.032(4) 0.034(4) 0.013(3) -0.002(3) -0.002(3) 0.012(3)
C28 0.021(3) 0.039(4) 0.019(3) 0.002(3) 0.002(3) 0.008(3)
C29 0.023(3) 0.031(4) 0.015(3) -0.001(3) 0.005(3) -0.002(3)
C30 0.025(4) 0.032(4) 0.030(4) 0.003(3) 0.009(3) 0.001(3)
O25 0.029(3) 0.075(4) 0.024(3) -0.010(3) 0.003(2) 0.004(3)
O26 0.019(3) 0.066(4) 0.034(3) -0.012(3) 0.005(2) -0.003(3)
O27 0.026(3) 0.096(5) 0.030(3) 0.002(3) 0.007(2) 0.009(3)
O28 0.027(3) 0.110(6) 0.017(3) -0.011(3) 0.001(2) -0.019(3)
N13 0.024(3) 0.039(4) 0.013(3) 0.005(3) 0.002(2) 0.007(3)
N14 0.015(3) 0.029(3) 0.025(3) 0.001(3) -0.001(2) 0.000(2)
C31 0.011(3) 0.036(4) 0.029(4) 0.001(3) 0.006(3) 0.004(3)
C32 0.028(4) 0.028(4) 0.030(4) 0.001(3) 0.006(3) -0.001(3)
C33 0.022(3) 0.043(5) 0.019(3) 0.001(3) 0.006(3) -0.008(3)
C34 0.022(3) 0.031(4) 0.021(3) 0.002(3) 0.000(3) -0.006(3)
C35 0.019(3) 0.060(5) 0.021(4) 0.012(4) 0.001(3) -0.003(4)
O29 0.029(3) 0.083(5) 0.023(3) -0.009(3) 0.003(2) -0.006(3)
O30 0.017(3) 0.065(4) 0.027(3) -0.009(3) 0.004(2) -0.004(2)
O31 0.023(3) 0.093(5) 0.022(3) -0.007(3) 0.007(2) -0.002(3)
O32 0.020(2) 0.044(3) 0.022(2) 0.003(2) 0.010(2) 0.001(2)
N15 0.008(3) 0.044(4) 0.018(3) -0.003(3) 0.001(2) -0.004(2)
N16 0.025(3) 0.045(4) 0.016(3) 0.001(3) 0.009(2) -0.007(3)
C36 0.026(4) 0.050(5) 0.013(3) 0.002(3) -0.001(3) -0.004(4)
C37 0.017(3) 0.021(4) 0.025(3) 0.007(3) 0.004(3) 0.001(3)
C38 0.018(3) 0.027(4) 0.021(3) -0.008(3) 0.005(3) 0.000(3)
C39 0.024(3) 0.015(3) 0.016(3) 0.000(3) 0.008(3) -0.003(3)
C40 0.014(3) 0.034(4) 0.027(4) -0.010(3) 0.005(3) -0.001(3)
N17 0.032(4) 0.047(4) 0.022(3) -0.007(3) -0.002(3) -0.004(3)
N18 0.016(3) 0.058(5) 0.020(3) -0.006(3) 0.000(2) -0.004(3)
C41 0.032(4) 0.038(4) 0.019(3) -0.005(3) 0.002(3) 0.001(3)
C42 0.042(4) 0.031(4) 0.037(4) -0.008(4) -0.001(3) 0.000(3)
C43 0.038(4) 0.038(4) 0.037(4) -0.002(4) 0.000(3) 0.011(4)
C44 0.032(4) 0.050(4) 0.019(4) 0.005(3) 0.004(3) 0.002(3)
C45 0.025(4) 0.038(4) 0.022(3) -0.004(3) 0.008(3) -0.004(3)
C46 0.024(3) 0.043(4) 0.020(3) -0.005(3) 0.012(3) 0.001(3)
C47 0.020(3) 0.044(4) 0.021(3) 0.003(3) 0.002(3) -0.007(3)
C48 0.026(4) 0.041(4) 0.033(4) -0.002(3) 0.006(3) -0.001(3)
C49 0.029(4) 0.045(4) 0.031(4) -0.008(4) -0.002(3) -0.007(3)
C50 0.018(3) 0.045(4) 0.027(4) -0.002(3) 0.007(3) -0.004(3)
C51 0.043(5) 0.060(6) 0.033(5) 0.010(4) -0.007(4) -0.008(4)
C52 0.028(4) 0.078(7) 0.049(5) 0.000(5) 0.004(4) -0.012(5)
C53 0.049(5) 0.056(6) 0.030(4) -0.004(4) 0.008(4) 0.004(4)
C54 0.016(4) 0.064(6) 0.032(4) -0.008(4) 0.006(3) -0.004(4)
N19 0.025(3) 0.022(3) 0.029(3) 0.004(3) 0.002(3) 0.007(3)
N20 0.022(3) 0.021(3) 0.022(3) -0.001(2) 0.003(2) -0.001(2)
C55 0.028(4) 0.025(3) 0.016(3) 0.001(3) 0.002(3) 0.003(3)
C56 0.040(4) 0.027(4) 0.036(4) -0.003(3) -0.002(3) -0.002(3)
C57 0.035(4) 0.030(4) 0.038(5) -0.003(3) -0.005(3) 0.011(3)
C58 0.026(4) 0.034(4) 0.030(4) -0.003(3) 0.007(3) 0.002(3)
C59 0.018(3) 0.028(3) 0.017(3) 0.001(3) 0.005(3) 0.001(3)
C60 0.027(3) 0.027(3) 0.010(3) 0.001(3) 0.003(3) -0.005(3)
C61 0.018(3) 0.030(4) 0.019(3) -0.001(3) 0.004(3) -0.001(3)
C62 0.041(4) 0.019(3) 0.028(4) 0.006(3) 0.005(3) 0.004(3)
C63 0.034(4) 0.023(4) 0.031(4) -0.003(3) 0.005(3) -0.011(3)
C64 0.031(4) 0.030(4) 0.014(3) -0.003(3) 0.005(3) -0.005(3)
C65 0.037(5) 0.057(6) 0.041(5) 0.008(4) 0.003(4) -0.007(4)
C66 0.026(4) 0.049(5) 0.032(4) -0.012(4) -0.001(3) -0.003(4)
C67 0.021(4) 0.043(5) 0.044(5) 0.001(4) 0.009(3) 0.012(3)
C68 0.035(4) 0.043(5) 0.021(4) 0.006(3) 0.002(3) 0.006(4)
N21 0.033(3) 0.029(4) 0.026(3) 0.001(3) 0.007(3) 0.007(3)
N22 0.019(3) 0.043(4) 0.026(3) -0.016(3) 0.004(3) -0.001(3)
C69 0.028(4) 0.035(4) 0.025(4) 0.000(3) 0.012(3) -0.002(3)
C70 0.038(4) 0.040(4) 0.038(4) -0.007(4) 0.008(3) 0.003(4)
C71 0.049(5) 0.040(4) 0.026(4) -0.008(3) 0.005(3) -0.011(4)
C72 0.030(4) 0.047(4) 0.026(4) 0.001(3) 0.014(3) -0.007(3)
C73 0.027(4) 0.044(4) 0.022(3) 0.005(3) 0.015(3) 0.000(3)
C74 0.022(3) 0.035(3) 0.019(3) 0.005(3) 0.009(3) -0.001(3)
C75 0.021(3) 0.034(4) 0.021(3) 0.007(3) 0.008(3) 0.007(3)
C76 0.032(4) 0.032(4) 0.035(4) -0.004(3) 0.000(3) 0.010(3)
C77 0.037(4) 0.045(4) 0.032(4) 0.006(4) -0.006(3) 0.009(4)
C78 0.020(3) 0.048(4) 0.018(3) 0.003(3) -0.001(3) 0.004(3)
C79 0.049(5) 0.051(6) 0.032(5) 0.014(4) 0.006(4) 0.002(4)
C80 0.027(4) 0.042(5) 0.042(5) -0.006(4) 0.013(4) 0.001(4)
C81 0.034(5) 0.048(6) 0.053(6) -0.009(4) 0.015(4) -0.003(4)
C82 0.042(5) 0.053(6) 0.030(4) -0.023(4) 0.006(4) 0.014(4)
N23 0.028(3) 0.045(4) 0.021(3) 0.010(3) 0.000(3) 0.003(3)
N24 0.030(3) 0.051(4) 0.019(3) -0.003(3) 0.010(3) 0.004(3)
C83 0.046(5) 0.032(4) 0.033(4) -0.001(3) 0.009(4) 0.000(4)
C84 0.053(5) 0.031(4) 0.035(4) -0.006(3) 0.003(4) -0.008(4)
C85 0.054(5) 0.037(4) 0.031(4) -0.013(4) 0.005(4) 0.002(4)
C86 0.037(4) 0.059(5) 0.018(4) -0.010(3) -0.002(3) -0.002(4)
C87 0.027(4) 0.043(4) 0.022(4) -0.004(3) 0.000(3) 0.007(3)
C88 0.032(4) 0.035(4) 0.026(4) 0.006(3) 0.002(3) -0.002(3)
C89 0.034(4) 0.042(4) 0.024(4) -0.009(3) 0.010(3) 0.001(3)
C90 0.034(4) 0.045(5) 0.052(5) -0.006(4) 0.018(4) -0.004(4)
C91 0.043(5) 0.039(5) 0.057(6) 0.001(4) 0.017(4) -0.007(4)
C92 0.025(4) 0.045(4) 0.050(5) -0.004(4) 0.023(4) 0.002(3)
C93 0.038(5) 0.060(6) 0.046(5) 0.004(5) -0.001(4) 0.007(4)
C94 0.047(5) 0.043(5) 0.038(5) 0.015(4) 0.001(4) -0.008(4)
C95 0.044(5) 0.056(6) 0.030(4) -0.008(4) -0.001(4) 0.003(4)
C96 0.036(5) 0.047(5) 0.041(5) 0.007(4) 0.013(4) -0.002(4)
N25 0.022(3) 0.038(4) 0.021(3) 0.000(3) -0.002(2) -0.002(3)
N26 0.021(3) 0.026(3) 0.033(3) 0.001(3) 0.007(3) 0.003(3)
C97 0.023(3) 0.028(4) 0.030(4) 0.004(3) 0.012(3) 0.001(3)
C98 0.038(4) 0.026(4) 0.052(5) -0.001(4) 0.008(4) -0.003(3)
C99 0.045(4) 0.027(4) 0.034(4) 0.001(3) 0.007(3) 0.002(3)
C100 0.019(3) 0.038(4) 0.030(4) -0.001(3) 0.008(3) 0.009(3)
C101 0.022(3) 0.027(3) 0.016(3) -0.003(3) 0.008(3) 0.001(3)
C102 0.021(3) 0.029(3) 0.022(3) -0.004(3) 0.009(3) 0.003(3)
C103 0.020(3) 0.029(4) 0.022(3) 0.009(3) 0.011(3) 0.004(3)
C104 0.034(4) 0.024(4) 0.041(4) -0.007(3) 0.008(3) 0.000(3)
C105 0.038(4) 0.023(4) 0.040(4) -0.006(3) 0.005(3) -0.009(3)
C106 0.024(4) 0.040(4) 0.029(4) -0.009(3) 0.003(3) -0.008(3)
C107 0.030(4) 0.053(6) 0.029(4) -0.005(4) 0.003(3) -0.008(4)
C108 0.026(4) 0.044(5) 0.045(5) 0.009(4) 0.003(4) -0.004(4)
C109 0.043(5) 0.045(5) 0.028(4) 0.005(4) 0.008(4) 0.001(4)
C110 0.031(5) 0.059(6) 0.057(6) 0.015(5) 0.027(4) 0.017(4)
N27 0.022(3) 0.028(3) 0.012(3) -0.001(2) 0.002(2) -0.002(2)
N28 0.022(3) 0.028(3) 0.015(3) 0.005(2) 0.006(2) 0.001(3)
C111 0.023(3) 0.014(3) 0.021(3) 0.004(3) 0.005(3) 0.000(3)
C112 0.031(4) 0.043(4) 0.020(3) 0.007(3) 0.014(3) 0.004(3)
C113 0.036(4) 0.042(4) 0.027(4) 0.017(3) 0.012(3) -0.002(4)
C114 0.033(4) 0.039(4) 0.032(4) 0.010(3) 0.012(3) 0.010(3)
C115 0.021(3) 0.022(3) 0.021(3) 0.006(3) 0.005(3) 0.003(3)
C116 0.019(3) 0.027(3) 0.009(3) -0.004(3) 0.000(2) -0.004(3)
C117 0.015(3) 0.021(3) 0.018(3) 0.002(3) 0.000(2) -0.007(3)
C118 0.034(4) 0.042(4) 0.027(4) -0.008(3) 0.018(3) -0.005(4)
C119 0.030(4) 0.039(4) 0.029(4) -0.009(3) 0.007(3) -0.001(3)
C120 0.039(4) 0.024(4) 0.036(4) -0.010(3) 0.015(3) 0.002(3)
C121 0.018(3) 0.021(4) 0.039(4) 0.011(3) 0.004(3) 0.007(3)
C122 0.036(4) 0.039(5) 0.034(4) -0.013(4) 0.000(4) -0.005(4)
C123 0.034(4) 0.027(4) 0.031(4) -0.008(3) 0.001(3) -0.013(3)
C124 0.028(4) 0.044(5) 0.027(4) 0.014(4) 0.009(3) 0.005(4)
N29 0.027(4) 0.089(6) 0.020(3) 0.012(4) 0.003(3) -0.020(4)
N30 0.048(5) 0.064(5) 0.022(3) 0.015(4) 0.006(3) -0.014(4)
C125 0.037(4) 0.045(4) 0.036(4) -0.003(4) 0.009(4) -0.010(4)
C126 0.058(6) 0.063(6) 0.026(4) 0.003(4) 0.002(4) 0.002(5)
C127 0.052(5) 0.049(5) 0.027(4) 0.007(4) 0.005(4) -0.004(4)
C128 0.033(4) 0.069(5) 0.037(4) -0.002(4) 0.011(4) -0.010(4)
C129 0.027(4) 0.057(5) 0.035(4) 0.000(4) 0.002(3) -0.013(3)
C130 0.025(4) 0.046(4) 0.036(4) -0.008(3) 0.002(3) -0.007(3)
C131 0.041(5) 0.050(5) 0.045(5) -0.003(4) 0.010(4) -0.010(4)
C132 0.062(6) 0.053(6) 0.070(7) 0.003(5) 0.001(5) 0.009(5)
C133 0.060(6) 0.055(5) 0.053(6) -0.018(4) 0.000(4) 0.004(5)
C134 0.050(6) 0.043(5) 0.086(7) -0.018(4) 0.029(5) -0.014(4)
C135 0.049(5) 0.056(6) 0.034(5) -0.013(4) 0.008(4) 0.003(5)
C136 0.032(5) 0.094(9) 0.068(7) -0.037(7) -0.001(5) 0.009(5)
C137 0.059(7) 0.072(8) 0.071(7) -0.016(6) 0.004(6) -0.019(6)
C138 0.073(8) 0.090(9) 0.048(6) -0.002(6) -0.014(5) -0.008(7)
N31 0.025(3) 0.041(4) 0.020(3) 0.005(3) 0.006(3) 0.003(3)
N32 0.034(3) 0.017(3) 0.016(3) 0.002(2) 0.005(2) 0.005(3)
C139 0.028(4) 0.032(4) 0.031(4) -0.011(3) 0.005(3) 0.003(3)
C140 0.040(5) 0.051(5) 0.041(5) -0.010(4) 0.017(4) 0.003(4)
C141 0.054(5) 0.029(4) 0.059(5) -0.024(4) 0.018(4) 0.009(4)
C142 0.038(5) 0.025(4) 0.060(5) -0.016(4) 0.004(4) 0.001(3)
C143 0.021(4) 0.025(4) 0.048(4) -0.006(3) -0.002(3) 0.011(3)
C144 0.012(3) 0.024(3) 0.038(4) -0.002(3) 0.002(3) 0.002(3)
C145 0.035(4) 0.018(3) 0.030(4) 0.002(3) 0.006(3) 0.007(3)
C146 0.037(4) 0.035(4) 0.030(4) 0.009(3) 0.008(3) 0.007(4)
C147 0.039(5) 0.036(4) 0.044(5) 0.013(4) 0.004(4) 0.003(4)
C148 0.030(4) 0.039(4) 0.055(5) 0.001(4) 0.002(4) -0.006(4)
C149 0.094(8) 0.092(9) 0.013(4) 0.016(5) 0.000(5) 0.027(7)
C150 0.056(6) 0.055(6) 0.049(5) 0.001(5) 0.029(5) 0.000(5)
C151 0.036(4) 0.035(5) 0.047(5) 0.004(4) 0.021(4) 0.016(4)
C152 0.048(5) 0.044(5) 0.032(4) -0.004(4) 0.006(4) 0.001(4)

_geom_special_details
;
 All esds (except the esd in the dihedral angle between two l.s. planes)
 are estimated using the full covariance matrix.  The cell esds are taken
 into account individually in the estimation of esds in distances, angles
 and torsion angles; correlations between esds in cell parameters are only
 used when they are defined by crystal symmetry.  An approximate (isotropic)
 treatment of cell esds is used for estimating esds involving l.s. planes.
;

loop_
 _geom_bond_atom_site_label_1
 _geom_bond_atom_site_label_2
 _geom_bond_distance
 _geom_bond_site_symmetry_2
 _geom_bond_publ_flag
O1 C1 1.228(9) . ?
O2 C2 1.225(9) . ?
O3 C5 1.204(9) . ?
O4 C5 1.224(10) . ?
N1 H1 0.8800 . ?
N1 C2 1.372(9) . ?
N1 C4 1.378(9) . ?
N2 H2 0.8800 . ?
N2 C1 1.403(9) . ?
N2 C2 1.359(9) . ?
C1 C3 1.422(10) . ?
C3 H3 0.9500 . ?
C3 C4 1.331(10) . ?
C4 C5 1.558(10) . ?
O5 C6 1.221(9) . ?
O6 C7 1.267(9) . ?
O7 C10 1.240(9) . ?
O8 C10 1.263(9) . ?
N3 H3A 0.8800 . ?
N3 C6 1.347(9) . ?
N3 C9 1.390(9) . ?
N4 H4 0.8800 . ?
N4 C6 1.389(9) . ?
N4 C7 1.385(9) . ?
C7 C8 1.447(9) . ?
C8 H8 0.9500 . ?
C8 C9 1.353(10) . ?
C9 C10 1.524(10) . ?
O9 C11 1.225(8) . ?
O10 C12 1.214(9) . ?
O11 C15 1.248(10) . ?
O12 C15 1.221(10) . ?
N5 H5 0.8800 . ?
N5 C11 1.347(9) . ?
N5 C14 1.381(9) . ?
N6 H6 0.8800 . ?
N6 C11 1.394(9) . ?
N6 C12 1.393(9) . ?
C12 C13 1.458(11) . ?
C13 H13 0.9500 . ?
C13 C14 1.338(10) . ?
C14 C15 1.560(11) . ?
O13 C16 1.223(8) . ?
O14 C17 1.207(8) . ?
O15 C20 1.218(9) . ?
O16 C20 1.253(10) . ?
N7 H7 0.8800 . ?
N7 C16 1.387(8) . ?
N7 C19 1.369(9) . ?
N8 H8A 0.8800 . ?
N8 C16 1.362(9) . ?
N8 C17 1.381(9) . ?
C17 C18 1.443(9) . ?
C18 H18 0.9500 . ?
C18 C19 1.339(9) . ?
C19 C20 1.558(9) . ?
O17 C21 1.228(8) . ?
O18 C22 1.236(8) . ?
O19 C25 1.242(9) . ?
O20 C25 1.251(9) . ?
N9 H9 0.8800 . ?
N9 C21 1.366(9) . ?
N9 C24 1.385(8) . ?
N10 H10 0.8800 . ?
N10 C21 1.363(9) . ?
N10 C22 1.373(9) . ?
C22 C23 1.452(9) . ?
C23 H23 0.9500 . ?
C23 C24 1.362(10) . ?
C24 C25 1.517(10) . ?
O21 C26 1.220(9) . ?
O22 C27 1.245(9) . ?
O23 C30 1.246(8) . ?
O24 C30 1.269(8) . ?
N11 H11 0.8800 . ?
N11 C26 1.371(9) . ?
N11 C29 1.394(8) . ?
N12 H12 0.8800 . ?
N12 C26 1.367(9) . ?
N12 C27 1.411(9) . ?
C27 C28 1.455(10) . ?
C28 H28 0.9500 . ?
C28 C29 1.351(9) . ?
C29 C30 1.519(10) . ?
O25 C31 1.186(8) . ?
O26 C32 1.247(9) . ?
O27 C35 1.220(9) . ?
O28 C35 1.213(9) . ?
N13 H13A 0.8800 . ?
N13 C31 1.399(9) . ?
N13 C34 1.349(9) . ?
N14 H14 0.8800 . ?
N14 C31 1.398(9) . ?
N14 C32 1.381(9) . ?
C32 C33 1.422(10) . ?
C33 H33 0.9500 . ?
C33 C34 1.346(10) . ?
C34 C35 1.558(9) . ?
O29 C36 1.209(8) . ?
O30 C37 1.235(8) . ?
O31 C40 1.241(8) . ?
O32 C40 1.260(8) . ?
N15 H15 0.8800 . ?
N15 C36 1.354(9) . ?
N15 C39 1.379(8) . ?
N16 H16 0.8800 . ?
N16 C36 1.405(9) . ?
N16 C37 1.337(9) . ?
C37 C38 1.444(9) . ?
C38 H38 0.9500 . ?
C38 C39 1.361(9) . ?
C39 C40 1.505(9) . ?
N17 H17N 1.15(9) . ?
N17 C41 1.470(9) . ?
N17 C51 1.502(11) . ?
N17 C52 1.476(11) . ?
N18 H17N 1.48(10) . ?
N18 C47 1.484(9) . ?
N18 C53 1.495(11) . ?
N18 C54 1.487(9) . ?
C41 C42 1.343(11) . ?
C41 C46 1.442(11) . ?
C42 H42 0.9500 . ?
C42 C43 1.418(11) . ?
C43 H43 0.9500 . ?
C43 C44 1.335(12) . ?
C44 H44 0.9500 . ?
C44 C45 1.375(11) . ?
C45 C46 1.445(10) . ?
C45 C50 1.433(11) . ?
C46 C47 1.420(11) . ?
C47 C48 1.364(11) . ?
C48 H48 0.9500 . ?
C48 C49 1.414(10) . ?
C49 H49 0.9500 . ?
C49 C50 1.336(12) . ?
C50 H50 0.9500 . ?
C51 H51A 0.9800 . ?
C51 H51B 0.9800 . ?
C51 H51C 0.9800 . ?
C52 H52A 0.9800 . ?
C52 H52B 0.9800 . ?
C52 H52C 0.9800 . ?
C53 H53A 0.9800 . ?
C53 H53B 0.9800 . ?
C53 H53C 0.9800 . ?
C54 H54A 0.9800 . ?
C54 H54B 0.9800 . ?
C54 H54C 0.9800 . ?
N19 H19N 0.78(9) . ?
N19 C61 1.464(9) . ?
N19 C67 1.478(9) . ?
N19 C68 1.484(10) . ?
N20 C55 1.478(9) . ?
N20 C65 1.480(10) . ?
N20 C66 1.466(9) . ?
C55 C56 1.378(11) . ?
C55 C60 1.403(10) . ?
C56 H56 0.9500 . ?
C56 C57 1.412(10) . ?
C57 H57 0.9500 . ?
C57 C58 1.353(11) . ?
C58 H58 0.9500 . ?
C58 C59 1.407(10) . ?
C59 C60 1.445(9) . ?
C59 C64 1.429(10) . ?
C60 C61 1.421(10) . ?
C61 C62 1.371(10) . ?
C62 H62 0.9500 . ?
C62 C63 1.402(10) . ?
C63 H63 0.9500 . ?
C63 C64 1.355(11) . ?
C64 H64 0.9500 . ?
C65 H65A 0.9800 . ?
C65 H65B 0.9800 . ?
C65 H65C 0.9800 . ?
C66 H66A 0.9800 . ?
C66 H66B 0.9800 . ?
C66 H66C 0.9800 . ?
C67 H67A 0.9800 . ?
C67 H67B 0.9800 . ?
C67 H67C 0.9800 . ?
C68 H68A 0.9800 . ?
C68 H68B 0.9800 . ?
C68 H68C 0.9800 . ?
N21 H21N 1.09(9) . ?
N21 C69 1.502(9) . ?
N21 C79 1.493(10) . ?
N21 C80 1.457(9) . ?
N22 C75 1.458(9) . ?
N22 C81 1.498(10) . ?
N22 C82 1.466(9) . ?
C69 C70 1.356(11) . ?
C69 C74 1.411(11) . ?
C70 H70 0.9500 . ?
C70 C71 1.416(11) . ?
C71 H71 0.9500 . ?
C71 C72 1.347(12) . ?
C72 H72 0.9500 . ?
C72 C73 1.415(12) . ?
C73 C74 1.431(10) . ?
C73 C78 1.423(11) . ?
C74 C75 1.416(11) . ?
C75 C76 1.357(10) . ?
C76 H76 0.9500 . ?
C76 C77 1.396(11) . ?
C77 H77 0.9500 . ?
C77 C78 1.355(12) . ?
C78 H78 0.9500 . ?
C79 H79A 0.9800 . ?
C79 H79B 0.9800 . ?
C79 H79C 0.9800 . ?
C80 H80A 0.9800 . ?
C80 H80B 0.9800 . ?
C80 H80C 0.9800 . ?
C81 H81A 0.9800 . ?
C81 H81B 0.9800 . ?
C81 H81C 0.9800 . ?
C82 H82A 0.9800 . ?
C82 H82B 0.9800 . ?
C82 H82C 0.9800 . ?
N23 C83 1.450(10) . ?
N23 C93 1.453(10) . ?
N23 C94 1.515(10) . ?
N24 H24N 0.98(9) . ?
N24 C89 1.483(9) . ?
N24 C95 1.526(10) . ?
N24 C96 1.481(10) . ?
C83 C84 1.386(12) . ?
C83 C88 1.448(11) . ?
C84 H84 0.9500 . ?
C84 C85 1.406(12) . ?
C85 H85 0.9500 . ?
C85 C86 1.335(13) . ?
C86 H86 0.9500 . ?
C86 C87 1.392(12) . ?
C87 C88 1.379(11) . ?
C87 C92 1.466(12) . ?
C88 C89 1.469(11) . ?
C89 C90 1.330(12) . ?
C90 H90 0.9500 . ?
C90 C91 1.433(12) . ?
C91 H91 0.9500 . ?
C91 C92 1.334(12) . ?
C92 H92 0.9500 . ?
C93 H93A 0.9800 . ?
C93 H93B 0.9800 . ?
C93 H93C 0.9800 . ?
C94 H94A 0.9800 . ?
C94 H94B 0.9800 . ?
C94 H94C 0.9800 . ?
C95 H95A 0.9800 . ?
C95 H95B 0.9800 . ?
C95 H95C 0.9800 . ?
C96 H96A 0.9800 . ?
C96 H96B 0.9800 . ?
C96 H96C 0.9800 . ?
N25 H25N 1.32(8) . ?
N25 C97 1.474(9) . ?
N25 C107 1.499(10) . ?
N25 C108 1.459(10) . ?
N26 H25N 1.33(8) . ?
N26 C103 1.469(9) . ?
N26 C109 1.497(10) . ?
N26 C110 1.482(10) . ?
C97 C98 1.341(11) . ?
C97 C102 1.432(10) . ?
C98 H98 0.9500 . ?
C98 C99 1.411(11) . ?
C99 H99 0.9500 . ?
C99 C100 1.388(11) . ?
C100 H100 0.9500 . ?
C100 C101 1.431(10) . ?
C101 C102 1.406(9) . ?
C101 C106 1.409(11) . ?
C102 C103 1.437(10) . ?
C103 C104 1.362(11) . ?
C104 H104 0.9500 . ?
C104 C105 1.419(11) . ?
C105 H105 0.9500 . ?
C105 C106 1.344(11) . ?
C106 H106 0.9500 . ?
C107 H10A 0.9800 . ?
C107 H10B 0.9800 . ?
C107 H10C 0.9800 . ?
C108 H10D 0.9800 . ?
C108 H10E 0.9800 . ?
C108 H10F 0.9800 . ?
C109 H10G 0.9800 . ?
C109 H10H 0.9800 . ?
C109 H10I 0.9800 . ?
C110 H11A 0.9800 . ?
C110 H11B 0.9800 . ?
C110 H11C 0.9800 . ?
N27 C111 1.464(9) . ?
N27 C121 1.461(8) . ?
N27 C122 1.473(9) . ?
N28 H27N 0.76(8) . ?
N28 C117 1.461(9) . ?
N28 C123 1.464(9) . ?
N28 C124 1.491(9) . ?
C111 C112 1.386(10) . ?
C111 C116 1.446(9) . ?
C112 H112 0.9500 . ?
C112 C113 1.392(12) . ?
C113 H113 0.9500 . ?
C113 C114 1.372(11) . ?
C114 H114 0.9500 . ?
C114 C115 1.410(10) . ?
C115 C116 1.403(10) . ?
C115 C120 1.437(10) . ?
C116 C117 1.420(9) . ?
C117 C118 1.390(10) . ?
C118 H118 0.9500 . ?
C118 C119 1.385(12) . ?
C119 H119 0.9500 . ?
C119 C120 1.376(11) . ?
C120 H120 0.9500 . ?
C121 H12A 0.9800 . ?
C121 H12B 0.9800 . ?
C121 H12C 0.9800 . ?
C122 H12D 0.9800 . ?
C122 H12E 0.9800 . ?
C122 H12F 0.9800 . ?
C123 H12G 0.9800 . ?
C123 H12H 0.9800 . ?
C123 H12I 0.9800 . ?
C124 H12J 0.9800 . ?
C124 H12K 0.9800 . ?
C124 H12L 0.9800 . ?
N29 C125 1.532(10) . ?
N29 C135 1.430(11) . ?
N29 C136 1.468(10) . ?
N30 H30N 0.81(10) . ?
N30 C131 1.424(11) . ?
N30 C137 1.511(13) . ?
N30 C138 1.501(12) . ?
C125 C126 1.369(13) . ?
C125 C130 1.408(12) . ?
C126 H126 0.9500 . ?
C126 C127 1.485(12) . ?
C127 H127 0.9500 . ?
C127 C128 1.268(13) . ?
C128 H128 0.9500 . ?
C128 C129 1.437(13) . ?
C129 C130 1.423(12) . ?
C129 C134 1.484(14) . ?
C130 C131 1.454(13) . ?
C131 C132 1.421(14) . ?
C132 H132 0.9500 . ?
C132 C133 1.457(15) . ?
C133 H133 0.9500 . ?
C133 C134 1.345(15) . ?
C134 H134 0.9500 . ?
C135 H13B 0.9800 . ?
C135 H13C 0.9800 . ?
C135 H13D 0.9800 . ?
C136 H13E 0.9800 . ?
C136 H13F 0.9800 . ?
C136 H13G 0.9800 . ?
C137 H13H 0.9800 . ?
C137 H13I 0.9800 . ?
C137 H13J 0.9800 . ?
C138 H13K 0.9800 . ?
C138 H13L 0.9800 . ?
C138 H13M 0.9800 . ?
N31 H32N 1.24(7) . ?
N31 C139 1.463(11) . ?
N31 C149 1.492(10) . ?
N31 C150 1.475(11) . ?
N32 H32N 1.45(7) . ?
N32 C145 1.469(9) . ?
N32 C151 1.494(9) . ?
N32 C152 1.509(10) . ?
C139 C140 1.384(11) . ?
C139 C144 1.429(11) . ?
C140 H140 0.9500 . ?
C140 C141 1.404(13) . ?
C141 H141 0.9500 . ?
C141 C142 1.360(13) . ?
C142 H142 0.9500 . ?
C142 C143 1.395(11) . ?
C143 C144 1.443(11) . ?
C143 C148 1.432(12) . ?
C144 C145 1.416(10) . ?
C145 C146 1.354(11) . ?
C146 H146 0.9500 . ?
C146 C147 1.398(12) . ?
C147 H147 0.9500 . ?
C147 C148 1.349(13) . ?
C148 H148 0.9500 . ?
C149 H14A 0.9800 . ?
C149 H14B 0.9800 . ?
C149 H14C 0.9800 . ?
C150 H15A 0.9800 . ?
C150 H15B 0.9800 . ?
C150 H15C 0.9800 . ?
C151 H15D 0.9800 . ?
C151 H15E 0.9800 . ?
C151 H15F 0.9800 . ?
C152 H15G 0.9800 . ?
C152 H15H 0.9800 . ?
C152 H15I 0.9800 . ?

loop_
 _geom_angle_atom_site_label_1
 _geom_angle_atom_site_label_2
 _geom_angle_atom_site_label_3
 _geom_angle
 _geom_angle_site_symmetry_1
 _geom_angle_site_symmetry_3
 _geom_angle_publ_flag
H1 N1 C2 119.6 . . ?
H1 N1 C4 119.6 . . ?
C2 N1 C4 120.9(6) . . ?
H2 N2 C1 116.6 . . ?
H2 N2 C2 116.6 . . ?
C1 N2 C2 126.7(6) . . ?
O1 C1 N2 119.7(7) . . ?
O1 C1 C3 126.9(7) . . ?
N2 C1 C3 113.4(6) . . ?
O2 C2 N1 121.6(6) . . ?
O2 C2 N2 122.6(7) . . ?
N1 C2 N2 115.7(6) . . ?
C1 C3 H3 119.5 . . ?
C1 C3 C4 121.1(6) . . ?
H3 C3 C4 119.5 . . ?
N1 C4 C3 121.9(6) . . ?
N1 C4 C5 114.3(6) . . ?
C3 C4 C5 123.8(6) . . ?
O3 C5 O4 129.3(7) . . ?
O3 C5 C4 116.7(7) . . ?
O4 C5 C4 113.9(6) . . ?
H3A N3 C6 118.7 . . ?
H3A N3 C9 118.7 . . ?
C6 N3 C9 122.6(6) . . ?
H4 N4 C6 117.7 . . ?
H4 N4 C7 117.7 . . ?
C6 N4 C7 124.6(6) . . ?
O5 C6 N3 122.4(7) . . ?
O5 C6 N4 121.6(7) . . ?
N3 C6 N4 116.0(6) . . ?
O6 C7 N4 118.5(6) . . ?
O6 C7 C8 124.6(6) . . ?
N4 C7 C8 116.9(6) . . ?
C7 C8 H8 121.1 . . ?
C7 C8 C9 117.9(6) . . ?
H8 C8 C9 121.1 . . ?
N3 C9 C8 122.0(6) . . ?
N3 C9 C10 115.8(6) . . ?
C8 C9 C10 122.1(6) . . ?
O7 C10 O8 127.3(7) . . ?
O7 C10 C9 116.9(6) . . ?
O8 C10 C9 115.8(6) . . ?
H5 N5 C11 118.8 . . ?
H5 N5 C14 118.8 . . ?
C11 N5 C14 122.4(6) . . ?
H6 N6 C11 117.3 . . ?
H6 N6 C12 117.3 . . ?
C11 N6 C12 125.4(6) . . ?
O9 C11 N5 123.3(6) . . ?
O9 C11 N6 120.3(7) . . ?
N5 C11 N6 116.4(6) . . ?
O10 C12 N6 118.7(7) . . ?
O10 C12 C13 127.5(7) . . ?
N6 C12 C13 113.8(6) . . ?
C12 C13 H13 119.6 . . ?
C12 C13 C14 120.9(7) . . ?
H13 C13 C14 119.6 . . ?
N5 C14 C13 121.2(7) . . ?
N5 C14 C15 114.4(6) . . ?
C13 C14 C15 124.4(7) . . ?
O11 C15 O12 128.9(8) . . ?
O11 C15 C14 116.0(7) . . ?
O12 C15 C14 115.0(7) . . ?
H7 N7 C16 118.5 . . ?
H7 N7 C19 118.5 . . ?
C16 N7 C19 123.0(6) . . ?
H8A N8 C16 116.4 . . ?
H8A N8 C17 116.4 . . ?
C16 N8 C17 127.1(6) . . ?
O13 C16 N7 122.7(6) . . ?
O13 C16 N8 123.1(6) . . ?
N7 C16 N8 114.2(6) . . ?
O14 C17 N8 120.8(6) . . ?
O14 C17 C18 124.6(6) . . ?
N8 C17 C18 114.5(6) . . ?
C17 C18 H18 119.9 . . ?
C17 C18 C19 120.2(6) . . ?
H18 C18 C19 119.9 . . ?
N7 C19 C18 120.9(6) . . ?
N7 C19 C20 116.1(6) . . ?
C18 C19 C20 123.0(6) . . ?
O15 C20 O16 129.9(7) . . ?
O15 C20 C19 116.2(7) . . ?
O16 C20 C19 113.9(6) . . ?
H9 N9 C21 118.0 . . ?
H9 N9 C24 118.0 . . ?
C21 N9 C24 123.9(6) . . ?
H10 N10 C21 116.7 . . ?
H10 N10 C22 116.7 . . ?
C21 N10 C22 126.6(6) . . ?
O17 C21 N9 122.9(6) . . ?
O17 C21 N10 121.7(7) . . ?
N9 C21 N10 115.3(6) . . ?
O18 C22 N10 120.3(6) . . ?
O18 C22 C23 125.0(6) . . ?
N10 C22 C23 114.7(6) . . ?
C22 C23 H23 119.7 . . ?
C22 C23 C24 120.6(6) . . ?
H23 C23 C24 119.7 . . ?
N9 C24 C23 118.7(6) . . ?
N9 C24 C25 116.7(6) . . ?
C23 C24 C25 124.5(6) . . ?
O19 C25 O20 128.4(7) . . ?
O19 C25 C24 115.6(6) . . ?
O20 C25 C24 116.0(6) . . ?
H11 N11 C26 118.6 . . ?
H11 N11 C29 118.6 . . ?
C26 N11 C29 122.8(6) . . ?
H12 N12 C26 116.9 . . ?
H12 N12 C27 116.9 . . ?
C26 N12 C27 126.2(6) . . ?
O21 C26 N11 122.0(6) . . ?
O21 C26 N12 122.5(6) . . ?
N11 C26 N12 115.4(6) . . ?
O22 C27 N12 119.6(6) . . ?
O22 C27 C28 125.5(6) . . ?
N12 C27 C28 114.8(6) . . ?
C27 C28 H28 120.4 . . ?
C27 C28 C29 119.2(6) . . ?
H28 C28 C29 120.4 . . ?
N11 C29 C28 121.4(6) . . ?
N11 C29 C30 116.3(6) . . ?
C28 C29 C30 122.4(6) . . ?
O23 C30 O24 127.4(7) . . ?
O23 C30 C29 117.3(6) . . ?
O24 C30 C29 115.3(6) . . ?
H13A N13 C31 118.1 . . ?
H13A N13 C34 118.1 . . ?
C31 N13 C34 123.8(6) . . ?
H14 N14 C31 116.2 . . ?
H14 N14 C32 116.2 . . ?
C31 N14 C32 127.6(6) . . ?
O25 C31 N13 126.3(6) . . ?
O25 C31 N14 121.5(6) . . ?
N13 C31 N14 112.2(6) . . ?
O26 C32 N14 119.0(6) . . ?
O26 C32 C33 126.8(7) . . ?
N14 C32 C33 114.2(6) . . ?
C32 C33 H33 119.6 . . ?
C32 C33 C34 120.9(6) . . ?
H33 C33 C34 119.6 . . ?
N13 C34 C33 121.3(6) . . ?
N13 C34 C35 115.0(6) . . ?
C33 C34 C35 123.7(6) . . ?
O27 C35 O28 129.6(7) . . ?
O27 C35 C34 114.2(6) . . ?
O28 C35 C34 116.1(6) . . ?
H15 N15 C36 117.5 . . ?
H15 N15 C39 117.5 . . ?
C36 N15 C39 125.0(6) . . ?
H16 N16 C36 116.3 . . ?
H16 N16 C37 116.3 . . ?
C36 N16 C37 127.4(6) . . ?
O29 C36 N15 123.8(7) . . ?
O29 C36 N16 122.9(7) . . ?
N15 C36 N16 113.1(6) . . ?
O30 C37 N16 120.8(6) . . ?
O30 C37 C38 123.9(6) . . ?
N16 C37 C38 115.3(6) . . ?
C37 C38 H38 119.9 . . ?
C37 C38 C39 120.3(6) . . ?
H38 C38 C39 119.9 . . ?
N15 C39 C38 118.9(6) . . ?
N15 C39 C40 117.1(6) . . ?
C38 C39 C40 124.0(6) . . ?
O31 C40 O32 127.2(6) . . ?
O31 C40 C39 116.6(6) . . ?
O32 C40 C39 116.1(6) . . ?
H17N N17 C41 97(4) . . ?
H17N N17 C51 114(4) . . ?
H17N N17 C52 110(4) . . ?
C41 N17 C51 111.9(6) . . ?
C41 N17 C52 110.5(6) . . ?
C51 N17 C52 112.6(7) . . ?
H17N N18 C47 94(3) . . ?
H17N N18 C53 114(3) . . ?
H17N N18 C54 113(3) . . ?
C47 N18 C53 113.6(6) . . ?
C47 N18 C54 112.2(6) . . ?
C53 N18 C54 109.7(7) . . ?
N17 C41 C42 122.2(7) . . ?
N17 C41 C46 116.8(7) . . ?
C42 C41 C46 121.0(7) . . ?
C41 C42 H42 119.6 . . ?
C41 C42 C43 120.8(8) . . ?
H42 C42 C43 119.6 . . ?
C42 C43 H43 120.0 . . ?
C42 C43 C44 120.1(8) . . ?
H43 C43 C44 120.0 . . ?
C43 C44 H44 119.2 . . ?
C43 C44 C45 121.6(7) . . ?
H44 C44 C45 119.2 . . ?
C44 C45 C46 120.6(7) . . ?
C44 C45 C50 122.2(7) . . ?
C46 C45 C50 117.1(7) . . ?
C41 C46 C45 115.8(7) . . ?
C41 C46 C47 127.5(6) . . ?
C45 C46 C47 116.7(7) . . ?
N18 C47 C46 117.5(7) . . ?
N18 C47 C48 119.3(7) . . ?
C46 C47 C48 123.2(7) . . ?
C47 C48 H48 120.0 . . ?
C47 C48 C49 120.1(8) . . ?
H48 C48 C49 120.0 . . ?
C48 C49 H49 120.7 . . ?
C48 C49 C50 118.6(8) . . ?
H49 C49 C50 120.7 . . ?
C45 C50 C49 124.3(7) . . ?
C45 C50 H50 117.9 . . ?
C49 C50 H50 117.9 . . ?
N17 C51 H51A 109.5 . . ?
N17 C51 H51B 109.5 . . ?
N17 C51 H51C 109.5 . . ?
H51A C51 H51B 109.5 . . ?
H51A C51 H51C 109.5 . . ?
H51B C51 H51C 109.5 . . ?
N17 C52 H52A 109.5 . . ?
N17 C52 H52B 109.5 . . ?
N17 C52 H52C 109.5 . . ?
H52A C52 H52B 109.5 . . ?
H52A C52 H52C 109.5 . . ?
H52B C52 H52C 109.5 . . ?
N18 C53 H53A 109.5 . . ?
N18 C53 H53B 109.5 . . ?
N18 C53 H53C 109.5 . . ?
H53A C53 H53B 109.5 . . ?
H53A C53 H53C 109.5 . . ?
H53B C53 H53C 109.5 . . ?
N18 C54 H54A 109.5 . . ?
N18 C54 H54B 109.5 . . ?
N18 C54 H54C 109.5 . . ?
H54A C54 H54B 109.5 . . ?
H54A C54 H54C 109.5 . . ?
H54B C54 H54C 109.5 . . ?
H19N N19 C61 113(6) . . ?
H19N N19 C67 84(6) . . ?
H19N N19 C68 118(6) . . ?
C61 N19 C67 111.7(6) . . ?
C61 N19 C68 112.7(6) . . ?
C67 N19 C68 113.8(6) . . ?
C55 N20 C65 111.3(6) . . ?
C55 N20 C66 113.2(5) . . ?
C65 N20 C66 110.5(6) . . ?
N20 C55 C56 120.3(6) . . ?
N20 C55 C60 117.9(6) . . ?
C56 C55 C60 121.7(6) . . ?
C55 C56 H56 119.8 . . ?
C55 C56 C57 120.4(7) . . ?
H56 C56 C57 119.8 . . ?
C56 C57 H57 120.0 . . ?
C56 C57 C58 120.1(7) . . ?
H57 C57 C58 120.0 . . ?
C57 C58 H58 119.6 . . ?
C57 C58 C59 120.8(7) . . ?
H58 C58 C59 119.6 . . ?
C58 C59 C60 120.3(6) . . ?
C58 C59 C64 120.2(6) . . ?
C60 C59 C64 119.5(6) . . ?
C55 C60 C59 116.8(6) . . ?
C55 C60 C61 126.1(6) . . ?
C59 C60 C61 117.2(6) . . ?
N19 C61 C60 119.3(6) . . ?
N19 C61 C62 119.4(6) . . ?
C60 C61 C62 121.3(6) . . ?
C61 C62 H62 119.5 . . ?
C61 C62 C63 120.9(7) . . ?
H62 C62 C63 119.5 . . ?
C62 C63 H63 119.7 . . ?
C62 C63 C64 120.6(7) . . ?
H63 C63 C64 119.7 . . ?
C59 C64 C63 120.4(6) . . ?
C59 C64 H64 119.8 . . ?
C63 C64 H64 119.8 . . ?
N20 C65 H65A 109.5 . . ?
N20 C65 H65B 109.5 . . ?
N20 C65 H65C 109.5 . . ?
H65A C65 H65B 109.5 . . ?
H65A C65 H65C 109.5 . . ?
H65B C65 H65C 109.5 . . ?
N20 C66 H66A 109.5 . . ?
N20 C66 H66B 109.5 . . ?
N20 C66 H66C 109.5 . . ?
H66A C66 H66B 109.5 . . ?
H66A C66 H66C 109.5 . . ?
H66B C66 H66C 109.5 . . ?
N19 C67 H67A 109.5 . . ?
N19 C67 H67B 109.5 . . ?
N19 C67 H67C 109.5 . . ?
H67A C67 H67B 109.5 . . ?
H67A C67 H67C 109.5 . . ?
H67B C67 H67C 109.5 . . ?
N19 C68 H68A 109.5 . . ?
N19 C68 H68B 109.5 . . ?
N19 C68 H68C 109.5 . . ?
H68A C68 H68B 109.5 . . ?
H68A C68 H68C 109.5 . . ?
H68B C68 H68C 109.5 . . ?
H21N N21 C69 100(4) . . ?
H21N N21 C79 116(4) . . ?
H21N N21 C80 106(4) . . ?
C69 N21 C79 112.6(6) . . ?
C69 N21 C80 110.5(6) . . ?
C79 N21 C80 110.8(6) . . ?
C75 N22 C81 110.0(6) . . ?
C75 N22 C82 113.6(6) . . ?
C81 N22 C82 112.2(7) . . ?
N21 C69 C70 119.3(7) . . ?
N21 C69 C74 117.2(6) . . ?
C70 C69 C74 123.5(7) . . ?
C69 C70 H70 120.2 . . ?
C69 C70 C71 119.6(8) . . ?
H70 C70 C71 120.2 . . ?
C70 C71 H71 120.1 . . ?
C70 C71 C72 119.9(8) . . ?
H71 C71 C72 120.1 . . ?
C71 C72 H72 119.5 . . ?
C71 C72 C73 121.1(7) . . ?
H72 C72 C73 119.5 . . ?
C72 C73 C74 120.3(7) . . ?
C72 C73 C78 120.4(7) . . ?
C74 C73 C78 119.3(7) . . ?
C69 C74 C73 115.6(7) . . ?
C69 C74 C75 126.8(6) . . ?
C73 C74 C75 117.5(7) . . ?
N22 C75 C74 118.5(6) . . ?
N22 C75 C76 120.5(7) . . ?
C74 C75 C76 121.0(6) . . ?
C75 C76 H76 119.3 . . ?
C75 C76 C77 121.4(8) . . ?
H76 C76 C77 119.3 . . ?
C76 C77 H77 120.0 . . ?
C76 C77 C78 120.0(8) . . ?
H77 C77 C78 120.0 . . ?
C73 C78 C77 120.7(7) . . ?
C73 C78 H78 119.7 . . ?
C77 C78 H78 119.7 . . ?
N21 C79 H79A 109.5 . . ?
N21 C79 H79B 109.5 . . ?
N21 C79 H79C 109.5 . . ?
H79A C79 H79B 109.5 . . ?
H79A C79 H79C 109.5 . . ?
H79B C79 H79C 109.5 . . ?
N21 C80 H80A 109.5 . . ?
N21 C80 H80B 109.5 . . ?
N21 C80 H80C 109.5 . . ?
H80A C80 H80B 109.5 . . ?
H80A C80 H80C 109.5 . . ?
H80B C80 H80C 109.5 . . ?
N22 C81 H81A 109.5 . . ?
N22 C81 H81B 109.5 . . ?
N22 C81 H81C 109.5 . . ?
H81A C81 H81B 109.5 . . ?
H81A C81 H81C 109.5 . . ?
H81B C81 H81C 109.5 . . ?
N22 C82 H82A 109.5 . . ?
N22 C82 H82B 109.5 . . ?
N22 C82 H82C 109.5 . . ?
H82A C82 H82B 109.5 . . ?
H82A C82 H82C 109.5 . . ?
H82B C82 H82C 109.5 . . ?
C83 N23 C93 113.1(6) . . ?
C83 N23 C94 109.3(6) . . ?
C93 N23 C94 111.1(7) . . ?
H24N N24 C89 101(5) . . ?
H24N N24 C95 114(5) . . ?
H24N N24 C96 112(5) . . ?
C89 N24 C95 113.1(6) . . ?
C89 N24 C96 107.9(6) . . ?
C95 N24 C96 108.8(7) . . ?
N23 C83 C84 122.3(8) . . ?
N23 C83 C88 120.6(7) . . ?
C84 C83 C88 117.1(7) . . ?
C83 C84 H84 119.4 . . ?
C83 C84 C85 121.1(8) . . ?
H84 C84 C85 119.4 . . ?
C84 C85 H85 120.0 . . ?
C84 C85 C86 120.0(8) . . ?
H85 C85 C86 120.0 . . ?
C85 C86 H86 119.0 . . ?
C85 C86 C87 122.1(8) . . ?
H86 C86 C87 119.0 . . ?
C86 C87 C88 119.1(8) . . ?
C86 C87 C92 119.2(7) . . ?
C88 C87 C92 121.7(7) . . ?
C83 C88 C87 120.4(7) . . ?
C83 C88 C89 123.7(7) . . ?
C87 C88 C89 115.9(7) . . ?
N24 C89 C88 115.8(7) . . ?
N24 C89 C90 122.7(8) . . ?
C88 C89 C90 121.4(7) . . ?
C89 C90 H90 119.2 . . ?
C89 C90 C91 121.6(8) . . ?
H90 C90 C91 119.2 . . ?
C90 C91 H91 120.1 . . ?
C90 C91 C92 119.7(8) . . ?
H91 C91 C92 120.1 . . ?
C87 C92 C91 119.4(7) . . ?
C87 C92 H92 120.3 . . ?
C91 C92 H92 120.3 . . ?
N23 C93 H93A 109.5 . . ?
N23 C93 H93B 109.5 . . ?
N23 C93 H93C 109.5 . . ?
H93A C93 H93B 109.5 . . ?
H93A C93 H93C 109.5 . . ?
H93B C93 H93C 109.5 . . ?
N23 C94 H94A 109.5 . . ?
N23 C94 H94B 109.5 . . ?
N23 C94 H94C 109.5 . . ?
H94A C94 H94B 109.5 . . ?
H94A C94 H94C 109.5 . . ?
H94B C94 H94C 109.5 . . ?
N24 C95 H95A 109.5 . . ?
N24 C95 H95B 109.5 . . ?
N24 C95 H95C 109.5 . . ?
H95A C95 H95B 109.5 . . ?
H95A C95 H95C 109.5 . . ?
H95B C95 H95C 109.5 . . ?
N24 C96 H96A 109.5 . . ?
N24 C96 H96B 109.5 . . ?
N24 C96 H96C 109.5 . . ?
H96A C96 H96B 109.5 . . ?
H96A C96 H96C 109.5 . . ?
H96B C96 H96C 109.5 . . ?
H25N N25 C97 103(3) . . ?
H25N N25 C107 111(3) . . ?
H25N N25 C108 107(3) . . ?
C97 N25 C107 112.9(6) . . ?
C97 N25 C108 112.2(6) . . ?
C107 N25 C108 110.6(6) . . ?
H25N N26 C103 102(3) . . ?
H25N N26 C109 115(3) . . ?
H25N N26 C110 103(3) . . ?
C103 N26 C109 114.4(6) . . ?
C103 N26 C110 110.1(6) . . ?
C109 N26 C110 110.7(6) . . ?
N25 C97 C98 121.5(7) . . ?
N25 C97 C102 117.8(6) . . ?
C98 C97 C102 120.7(7) . . ?
C97 C98 H98 118.9 . . ?
C97 C98 C99 122.1(8) . . ?
H98 C98 C99 118.9 . . ?
C98 C99 H99 120.6 . . ?
C98 C99 C100 118.9(7) . . ?
H99 C99 C100 120.6 . . ?
C99 C100 H100 119.8 . . ?
C99 C100 C101 120.3(6) . . ?
H100 C100 C101 119.8 . . ?
C100 C101 C102 119.4(7) . . ?
C100 C101 C106 119.8(6) . . ?
C102 C101 C106 120.8(7) . . ?
C97 C102 C101 118.6(7) . . ?
C97 C102 C103 124.7(6) . . ?
C101 C102 C103 116.6(7) . . ?
N26 C103 C102 118.6(6) . . ?
N26 C103 C104 120.0(6) . . ?
C102 C103 C104 121.5(6) . . ?
C103 C104 H104 120.0 . . ?
C103 C104 C105 120.0(7) . . ?
H104 C104 C105 120.0 . . ?
C104 C105 H105 120.0 . . ?
C104 C105 C106 119.9(7) . . ?
H105 C105 C106 120.0 . . ?
C101 C106 C105 121.0(7) . . ?
C101 C106 H106 119.5 . . ?
C105 C106 H106 119.5 . . ?
N25 C107 H10A 109.5 . . ?
N25 C107 H10B 109.5 . . ?
N25 C107 H10C 109.5 . . ?
H10A C107 H10B 109.5 . . ?
H10A C107 H10C 109.5 . . ?
H10B C107 H10C 109.5 . . ?
N25 C108 H10D 109.5 . . ?
N25 C108 H10E 109.5 . . ?
N25 C108 H10F 109.5 . . ?
H10D C108 H10E 109.5 . . ?
H10D C108 H10F 109.5 . . ?
H10E C108 H10F 109.5 . . ?
N26 C109 H10G 109.5 . . ?
N26 C109 H10H 109.5 . . ?
N26 C109 H10I 109.5 . . ?
H10G C109 H10H 109.5 . . ?
H10G C109 H10I 109.5 . . ?
H10H C109 H10I 109.5 . . ?
N26 C110 H11A 109.5 . . ?
N26 C110 H11B 109.5 . . ?
N26 C110 H11C 109.5 . . ?
H11A C110 H11B 109.5 . . ?
H11A C110 H11C 109.5 . . ?
H11B C110 H11C 109.5 . . ?
C111 N27 C121 112.1(6) . . ?
C111 N27 C122 110.3(6) . . ?
C121 N27 C122 111.4(6) . . ?
H27N N28 C117 118(6) . . ?
H27N N28 C123 98(6) . . ?
H27N N28 C124 103(6) . . ?
C117 N28 C123 113.1(6) . . ?
C117 N28 C124 112.8(6) . . ?
C123 N28 C124 110.5(6) . . ?
N27 C111 C112 120.6(6) . . ?
N27 C111 C116 119.6(6) . . ?
C112 C111 C116 119.9(6) . . ?
C111 C112 H112 119.5 . . ?
C111 C112 C113 121.0(7) . . ?
H112 C112 C113 119.5 . . ?
C112 C113 H113 119.6 . . ?
C112 C113 C114 120.8(7) . . ?
H113 C113 C114 119.6 . . ?
C113 C114 H114 120.4 . . ?
C113 C114 C115 119.1(7) . . ?
H114 C114 C115 120.4 . . ?
C114 C115 C116 122.2(7) . . ?
C114 C115 C120 119.2(7) . . ?
C116 C115 C120 118.7(6) . . ?
C111 C116 C115 116.9(6) . . ?
C111 C116 C117 123.7(6) . . ?
C115 C116 C117 119.4(6) . . ?
N28 C117 C116 119.6(6) . . ?
N28 C117 C118 118.9(6) . . ?
C116 C117 C118 121.5(7) . . ?
C117 C118 H118 120.9 . . ?
C117 C118 C119 118.2(7) . . ?
H118 C118 C119 120.9 . . ?
C118 C119 H119 118.6 . . ?
C118 C119 C120 122.8(7) . . ?
H119 C119 C120 118.6 . . ?
C115 C120 C119 119.4(7) . . ?
C115 C120 H120 120.3 . . ?
C119 C120 H120 120.3 . . ?
N27 C121 H12A 109.5 . . ?
N27 C121 H12B 109.5 . . ?
N27 C121 H12C 109.5 . . ?
H12A C121 H12B 109.5 . . ?
H12A C121 H12C 109.5 . . ?
H12B C121 H12C 109.5 . . ?
N27 C122 H12D 109.5 . . ?
N27 C122 H12E 109.5 . . ?
N27 C122 H12F 109.5 . . ?
H12D C122 H12E 109.5 . . ?
H12D C122 H12F 109.5 . . ?
H12E C122 H12F 109.5 . . ?
N28 C123 H12G 109.5 . . ?
N28 C123 H12H 109.5 . . ?
N28 C123 H12I 109.5 . . ?
H12G C123 H12H 109.5 . . ?
H12G C123 H12I 109.5 . . ?
H12H C123 H12I 109.5 . . ?
N28 C124 H12J 109.5 . . ?
N28 C124 H12K 109.5 . . ?
N28 C124 H12L 109.5 . . ?
H12J C124 H12K 109.5 . . ?
H12J C124 H12L 109.5 . . ?
H12K C124 H12L 109.5 . . ?
C125 N29 C135 113.0(7) . . ?
C125 N29 C136 109.7(7) . . ?
C135 N29 C136 114.7(8) . . ?
H30N N30 C131 117(8) . . ?
H30N N30 C137 104(8) . . ?
H30N N30 C138 107(8) . . ?
C131 N30 C137 105.8(8) . . ?
C131 N30 C138 111.3(8) . . ?
C137 N30 C138 111.0(8) . . ?
N29 C125 C126 116.4(8) . . ?
N29 C125 C130 120.3(8) . . ?
C126 C125 C130 123.3(8) . . ?
C125 C126 H126 120.7 . . ?
C125 C126 C127 118.6(9) . . ?
H126 C126 C127 120.7 . . ?
C126 C127 H127 120.7 . . ?
C126 C127 C128 118.6(9) . . ?
H127 C127 C128 120.7 . . ?
C127 C128 H128 118.0 . . ?
C127 C128 C129 124.0(8) . . ?
H128 C128 C129 118.0 . . ?
C128 C129 C130 119.6(9) . . ?
C128 C129 C134 118.6(8) . . ?
C130 C129 C134 121.8(8) . . ?
C125 C130 C129 116.0(8) . . ?
C125 C130 C131 124.5(8) . . ?
C129 C130 C131 119.6(8) . . ?
N30 C131 C130 117.1(8) . . ?
N30 C131 C132 125.3(9) . . ?
C130 C131 C132 117.6(8) . . ?
C131 C132 H132 119.7 . . ?
C131 C132 C133 120.6(10) . . ?
H132 C132 C133 119.7 . . ?
C132 C133 H133 118.3 . . ?
C132 C133 C134 123.3(10) . . ?
H133 C133 C134 118.3 . . ?
C129 C134 C133 116.6(9) . . ?
C129 C134 H134 121.7 . . ?
C133 C134 H134 121.7 . . ?
N29 C135 H13B 109.5 . . ?
N29 C135 H13C 109.5 . . ?
N29 C135 H13D 109.5 . . ?
H13B C135 H13C 109.5 . . ?
H13B C135 H13D 109.5 . . ?
H13C C135 H13D 109.5 . . ?
N29 C136 H13E 109.5 . . ?
N29 C136 H13F 109.5 . . ?
N29 C136 H13G 109.5 . . ?
H13E C136 H13F 109.5 . . ?
H13E C136 H13G 109.5 . . ?
H13F C136 H13G 109.5 . . ?
N30 C137 H13H 109.5 . . ?
N30 C137 H13I 109.5 . . ?
N30 C137 H13J 109.5 . . ?
H13H C137 H13I 109.5 . . ?
H13H C137 H13J 109.5 . . ?
H13I C137 H13J 109.5 . . ?
N30 C138 H13K 109.5 . . ?
N30 C138 H13L 109.5 . . ?
N30 C138 H13M 109.5 . . ?
H13K C138 H13L 109.5 . . ?
H13K C138 H13M 109.5 . . ?
H13L C138 H13M 109.5 . . ?
H32N N31 C139 104(4) . . ?
H32N N31 C149 115(3) . . ?
H32N N31 C150 102(3) . . ?
C139 N31 C149 110.5(7) . . ?
C139 N31 C150 113.5(7) . . ?
C149 N31 C150 112.2(7) . . ?
H32N N32 C145 101(3) . . ?
H32N N32 C151 116(3) . . ?
H32N N32 C152 104(3) . . ?
C145 N32 C151 113.3(6) . . ?
C145 N32 C152 110.2(6) . . ?
C151 N32 C152 110.9(6) . . ?
N31 C139 C140 121.9(7) . . ?
N31 C139 C144 117.6(6) . . ?
C140 C139 C144 120.5(8) . . ?
C139 C140 H140 120.5 . . ?
C139 C140 C141 119.0(8) . . ?
H140 C140 C141 120.5 . . ?
C140 C141 H141 118.6 . . ?
C140 C141 C142 122.8(8) . . ?
H141 C141 C142 118.6 . . ?
C141 C142 H142 120.2 . . ?
C141 C142 C143 119.6(8) . . ?
H142 C142 C143 120.2 . . ?
C142 C143 C144 120.0(8) . . ?
C142 C143 C148 119.6(8) . . ?
C144 C143 C148 120.5(7) . . ?
C139 C144 C143 118.1(7) . . ?
C139 C144 C145 125.8(7) . . ?
C143 C144 C145 116.1(7) . . ?
N32 C145 C144 118.3(7) . . ?
N32 C145 C146 119.6(7) . . ?
C144 C145 C146 122.1(7) . . ?
C145 C146 H146 119.6 . . ?
C145 C146 C147 120.8(8) . . ?
H146 C146 C147 119.6 . . ?
C146 C147 H147 119.4 . . ?
C146 C147 C148 121.3(9) . . ?
H147 C147 C148 119.4 . . ?
C143 C148 C147 119.2(8) . . ?
C143 C148 H148 120.4 . . ?
C147 C148 H148 120.4 . . ?
N31 C149 H14A 109.5 . . ?
N31 C149 H14B 109.5 . . ?
N31 C149 H14C 109.5 . . ?
H14A C149 H14B 109.5 . . ?
H14A C149 H14C 109.5 . . ?
H14B C149 H14C 109.5 . . ?
N31 C150 H15A 109.5 . . ?
N31 C150 H15B 109.5 . . ?
N31 C150 H15C 109.5 . . ?
H15A C150 H15B 109.5 . . ?
H15A C150 H15C 109.5 . . ?
H15B C150 H15C 109.5 . . ?
N32 C151 H15D 109.5 . . ?
N32 C151 H15E 109.5 . . ?
N32 C151 H15F 109.5 . . ?
H15D C151 H15E 109.5 . . ?
H15D C151 H15F 109.5 . . ?
H15E C151 H15F 109.5 . . ?
N32 C152 H15G 109.5 . . ?
N32 C152 H15H 109.5 . . ?
N32 C152 H15I 109.5 . . ?
H15G C152 H15H 109.5 . . ?
H15G C152 H15I 109.5 . . ?
H15H C152 H15I 109.5 . . ?

loop_
 _geom_torsion_atom_site_label_1
 _geom_torsion_atom_site_label_2
 _geom_torsion_atom_site_label_3
 _geom_torsion_atom_site_label_4
 _geom_torsion
 _geom_torsion_site_symmetry_1
 _geom_torsion_site_symmetry_2
 _geom_torsion_site_symmetry_3
 _geom_torsion_site_symmetry_4
 _geom_torsion_publ_flag
C2 N2 C1 O1 178.1(8) . . . . ?
C2 N2 C1 C3 -2.4(12) . . . . ?
C1 N2 C2 O2 -179.0(8) . . . . ?
C1 N2 C2 N1 -2.1(12) . . . . ?
C4 N1 C2 O2 -177.3(8) . . . . ?
C4 N1 C2 N2 5.7(11) . . . . ?
O1 C1 C3 C4 -176.9(8) . . . . ?
N2 C1 C3 C4 3.6(11) . . . . ?
C1 C3 C4 N1 -0.3(12) . . . . ?
C1 C3 C4 C5 178.8(7) . . . . ?
C2 N1 C4 C3 -4.8(11) . . . . ?
C2 N1 C4 C5 176.1(7) . . . . ?
N1 C4 C5 O3 176.3(7) . . . . ?
N1 C4 C5 O4 -2.9(11) . . . . ?
C3 C4 C5 O3 -2.9(12) . . . . ?
C3 C4 C5 O4 177.9(9) . . . . ?
C9 N3 C6 O5 -179.5(8) . . . . ?
C9 N3 C6 N4 -1.1(11) . . . . ?
C7 N4 C6 O5 -178.1(8) . . . . ?
C7 N4 C6 N3 3.5(12) . . . . ?
C6 N4 C7 O6 179.2(7) . . . . ?
C6 N4 C7 C8 -4.1(12) . . . . ?
O6 C7 C8 C9 178.7(8) . . . . ?
N4 C7 C8 C9 2.2(11) . . . . ?
C7 C8 C9 N3 0.0(12) . . . . ?
C7 C8 C9 C10 176.7(7) . . . . ?
C6 N3 C9 C8 -0.5(12) . . . . ?
C6 N3 C9 C10 -177.4(7) . . . . ?
N3 C9 C10 O7 2.8(12) . . . . ?
N3 C9 C10 O8 -178.9(8) . . . . ?
C8 C9 C10 O7 -174.1(8) . . . . ?
C8 C9 C10 O8 4.3(12) . . . . ?
C14 N5 C11 O9 -177.4(8) . . . . ?
C14 N5 C11 N6 1.5(11) . . . . ?
C12 N6 C11 O9 176.6(8) . . . . ?
C12 N6 C11 N5 -2.3(11) . . . . ?
C11 N6 C12 O10 -179.8(9) . . . . ?
C11 N6 C12 C13 1.6(12) . . . . ?
O10 C12 C13 C14 -178.5(10) . . . . ?
N6 C12 C13 C14 -0.2(13) . . . . ?
C12 C13 C14 N5 -0.5(14) . . . . ?
C12 C13 C14 C15 179.0(8) . . . . ?
C11 N5 C14 C13 -0.2(12) . . . . ?
C11 N5 C14 C15 -179.8(7) . . . . ?
N5 C14 C15 O11 -168.5(8) . . . . ?
N5 C14 C15 O12 14.4(13) . . . . ?
C13 C14 C15 O11 11.9(14) . . . . ?
C13 C14 C15 O12 -165.1(10) . . . . ?
C17 N8 C16 O13 -179.3(7) . . . . ?
C17 N8 C16 N7 2.1(10) . . . . ?
C19 N7 C16 O13 -178.7(7) . . . . ?
C19 N7 C16 N8 -0.1(9) . . . . ?
C16 N8 C17 O14 179.1(7) . . . . ?
C16 N8 C17 C18 -3.4(10) . . . . ?
O14 C17 C18 C19 -179.7(7) . . . . ?
N8 C17 C18 C19 2.9(10) . . . . ?
C17 C18 C19 N7 -1.3(11) . . . . ?
C17 C18 C19 C20 -179.3(7) . . . . ?
C16 N7 C19 C18 -0.2(11) . . . . ?
C16 N7 C19 C20 177.9(6) . . . . ?
N7 C19 C20 O15 -177.7(7) . . . . ?
N7 C19 C20 O16 2.1(10) . . . . ?
C18 C19 C20 O15 0.4(12) . . . . ?
C18 C19 C20 O16 -179.8(8) . . . . ?
C22 N10 C21 O17 -178.2(8) . . . . ?
C22 N10 C21 N9 -0.8(12) . . . . ?
C24 N9 C21 O17 176.9(8) . . . . ?
C24 N9 C21 N10 -0.4(11) . . . . ?
C21 N10 C22 O18 -178.5(7) . . . . ?
C21 N10 C22 C23 3.2(11) . . . . ?
O18 C22 C23 C24 177.2(7) . . . . ?
N10 C22 C23 C24 -4.6(10) . . . . ?
C22 C23 C24 N9 3.7(10) . . . . ?
C22 C23 C24 C25 -179.3(7) . . . . ?
C21 N9 C24 C23 -1.1(11) . . . . ?
C21 N9 C24 C25 -178.3(7) . . . . ?
N9 C24 C25 O19 174.9(8) . . . . ?
N9 C24 C25 O20 -4.6(11) . . . . ?
C23 C24 C25 O19 -2.2(12) . . . . ?
C23 C24 C25 O20 178.3(8) . . . . ?
C27 N12 C26 O21 -177.8(7) . . . . ?
C27 N12 C26 N11 0.3(11) . . . . ?
C29 N11 C26 O21 176.4(7) . . . . ?
C29 N11 C26 N12 -1.7(10) . . . . ?
C26 N12 C27 O22 -178.7(7) . . . . ?
C26 N12 C27 C28 3.3(11) . . . . ?
O22 C27 C28 C29 176.4(8) . . . . ?
N12 C27 C28 C29 -5.7(11) . . . . ?
C27 C28 C29 N11 4.7(11) . . . . ?
C27 C28 C29 C30 -173.8(7) . . . . ?
C26 N11 C29 C28 -0.8(11) . . . . ?
C26 N11 C29 C30 177.7(6) . . . . ?
N11 C29 C30 O23 176.2(7) . . . . ?
N11 C29 C30 O24 -5.8(10) . . . . ?
C28 C29 C30 O23 -5.2(11) . . . . ?
C28 C29 C30 O24 172.8(7) . . . . ?
C32 N14 C31 O25 -177.8(8) . . . . ?
C32 N14 C31 N13 1.3(10) . . . . ?
C34 N13 C31 O25 177.7(8) . . . . ?
C34 N13 C31 N14 -1.4(10) . . . . ?
C31 N14 C32 O26 -177.0(7) . . . . ?
C31 N14 C32 C33 0.9(11) . . . . ?
O26 C32 C33 C34 174.5(8) . . . . ?
N14 C32 C33 C34 -3.2(11) . . . . ?
C32 C33 C34 N13 3.3(12) . . . . ?
C32 C33 C34 C35 -176.1(7) . . . . ?
C31 N13 C34 C33 -0.8(12) . . . . ?
C31 N13 C34 C35 178.6(7) . . . . ?
N13 C34 C35 O27 -7.9(11) . . . . ?
N13 C34 C35 O28 171.6(8) . . . . ?
C33 C34 C35 O27 171.5(8) . . . . ?
C33 C34 C35 O28 -8.9(13) . . . . ?
C39 N15 C36 O29 177.6(8) . . . . ?
C39 N15 C36 N16 2.8(11) . . . . ?
C37 N16 C36 O29 -177.0(8) . . . . ?
C37 N16 C36 N15 -2.2(12) . . . . ?
C36 N16 C37 O30 -179.9(7) . . . . ?
C36 N16 C37 C38 0.0(11) . . . . ?
O30 C37 C38 C39 -178.3(7) . . . . ?
N16 C37 C38 C39 1.8(10) . . . . ?
C37 C38 C39 N15 -1.3(10) . . . . ?
C37 C38 C39 C40 177.3(6) . . . . ?
C36 N15 C39 C38 -1.2(11) . . . . ?
C36 N15 C39 C40 -179.8(7) . . . . ?
N15 C39 C40 O31 167.5(7) . . . . ?
N15 C39 C40 O32 -10.2(10) . . . . ?
C38 C39 C40 O31 -11.1(11) . . . . ?
C38 C39 C40 O32 171.2(7) . . . . ?
C51 N17 C41 C42 -55.9(10) . . . . ?
C51 N17 C41 C46 125.4(8) . . . . ?
C52 N17 C41 C42 70.4(10) . . . . ?
C52 N17 C41 C46 -108.3(8) . . . . ?
N17 C41 C42 C43 -175.0(7) . . . . ?
C46 C41 C42 C43 3.8(13) . . . . ?
C41 C42 C43 C44 -1.6(13) . . . . ?
C42 C43 C44 C45 -0.3(13) . . . . ?
C43 C44 C45 C46 -0.2(12) . . . . ?
C43 C44 C45 C50 -177.1(7) . . . . ?
N17 C41 C46 C45 174.8(6) . . . . ?
N17 C41 C46 C47 -4.8(11) . . . . ?
C42 C41 C46 C45 -4.0(11) . . . . ?
C42 C41 C46 C47 176.4(7) . . . . ?
C44 C45 C46 C41 2.2(10) . . . . ?
C44 C45 C46 C47 -178.1(7) . . . . ?
C50 C45 C46 C41 179.3(6) . . . . ?
C50 C45 C46 C47 -1.0(10) . . . . ?
C41 C46 C47 N18 0.8(11) . . . . ?
C41 C46 C47 C48 179.9(7) . . . . ?
C45 C46 C47 N18 -178.9(6) . . . . ?
C45 C46 C47 C48 0.3(11) . . . . ?
C53 N18 C47 C46 -117.6(8) . . . . ?
C53 N18 C47 C48 63.2(9) . . . . ?
C54 N18 C47 C46 117.2(8) . . . . ?
C54 N18 C47 C48 -62.0(9) . . . . ?
N18 C47 C48 C49 179.4(7) . . . . ?
C46 C47 C48 C49 0.2(12) . . . . ?
C47 C48 C49 C50 0.0(12) . . . . ?
C48 C49 C50 C45 -0.8(12) . . . . ?
C44 C45 C50 C49 178.4(8) . . . . ?
C46 C45 C50 C49 1.3(11) . . . . ?
C65 N20 C55 C56 70.3(9) . . . . ?
C65 N20 C55 C60 -106.6(8) . . . . ?
C66 N20 C55 C56 -54.9(9) . . . . ?
C66 N20 C55 C60 128.2(7) . . . . ?
N20 C55 C56 C57 -174.5(7) . . . . ?
C60 C55 C56 C57 2.2(12) . . . . ?
C55 C56 C57 C58 -0.6(13) . . . . ?
C56 C57 C58 C59 -0.7(13) . . . . ?
C57 C58 C59 C60 0.5(11) . . . . ?
C57 C58 C59 C64 -178.6(7) . . . . ?
N20 C55 C60 C59 174.5(6) . . . . ?
N20 C55 C60 C61 -6.2(10) . . . . ?
C56 C55 C60 C59 -2.3(10) . . . . ?
C56 C55 C60 C61 176.9(7) . . . . ?
C58 C59 C60 C55 1.0(10) . . . . ?
C58 C59 C60 C61 -178.3(6) . . . . ?
C64 C59 C60 C55 -179.9(6) . . . . ?
C64 C59 C60 C61 0.8(9) . . . . ?
C55 C60 C61 N19 0.6(10) . . . . ?
C55 C60 C61 C62 179.4(7) . . . . ?
C59 C60 C61 N19 179.9(6) . . . . ?
C59 C60 C61 C62 -1.4(10) . . . . ?
C67 N19 C61 C60 116.2(7) . . . . ?
C67 N19 C61 C62 -62.6(9) . . . . ?
C68 N19 C61 C60 -114.2(7) . . . . ?
C68 N19 C61 C62 67.0(9) . . . . ?
N19 C61 C62 C63 179.3(7) . . . . ?
C60 C61 C62 C63 0.5(11) . . . . ?
C61 C62 C63 C64 1.1(12) . . . . ?
C62 C63 C64 C59 -1.6(11) . . . . ?
C58 C59 C64 C63 179.8(7) . . . . ?
C60 C59 C64 C63 0.7(10) . . . . ?
C79 N21 C69 C70 -64.7(9) . . . . ?
C79 N21 C69 C74 117.6(7) . . . . ?
C80 N21 C69 C70 59.9(9) . . . . ?
C80 N21 C69 C74 -117.8(7) . . . . ?
N21 C69 C70 C71 -178.0(7) . . . . ?
C74 C69 C70 C71 -0.5(12) . . . . ?
C69 C70 C71 C72 1.4(12) . . . . ?
C70 C71 C72 C73 -2.2(12) . . . . ?
C71 C72 C73 C74 2.0(11) . . . . ?
C71 C72 C73 C78 -177.3(7) . . . . ?
N21 C69 C74 C73 177.9(6) . . . . ?
N21 C69 C74 C75 0.1(11) . . . . ?
C70 C69 C74 C73 0.3(11) . . . . ?
C70 C69 C74 C75 -177.5(7) . . . . ?
C72 C73 C74 C69 -1.0(10) . . . . ?
C72 C73 C74 C75 177.0(6) . . . . ?
C78 C73 C74 C69 178.3(6) . . . . ?
C78 C73 C74 C75 -3.7(10) . . . . ?
C69 C74 C75 N22 4.0(11) . . . . ?
C69 C74 C75 C76 -177.8(7) . . . . ?
C73 C74 C75 N22 -173.8(6) . . . . ?
C73 C74 C75 C76 4.4(10) . . . . ?
C81 N22 C75 C74 107.9(8) . . . . ?
C81 N22 C75 C76 -70.4(9) . . . . ?
C82 N22 C75 C74 -125.5(7) . . . . ?
C82 N22 C75 C76 56.3(10) . . . . ?
N22 C75 C76 C77 174.2(7) . . . . ?
C74 C75 C76 C77 -3.9(12) . . . . ?
C75 C76 C77 C78 2.6(13) . . . . ?
C76 C77 C78 C73 -1.9(12) . . . . ?
C72 C73 C78 C77 -178.2(7) . . . . ?
C74 C73 C78 C77 2.5(11) . . . . ?
C93 N23 C83 C84 59.8(10) . . . . ?
C93 N23 C83 C88 -119.5(8) . . . . ?
C94 N23 C83 C84 -64.6(10) . . . . ?
C94 N23 C83 C88 116.1(8) . . . . ?
N23 C83 C84 C85 179.7(7) . . . . ?
C88 C83 C84 C85 -0.9(12) . . . . ?
C83 C84 C85 C86 1.3(13) . . . . ?
C84 C85 C86 C87 -3.9(13) . . . . ?
C85 C86 C87 C88 6.0(12) . . . . ?
C85 C86 C87 C92 -177.5(8) . . . . ?
C86 C87 C88 C83 -5.5(11) . . . . ?
C86 C87 C88 C89 176.8(7) . . . . ?
C92 C87 C88 C83 178.1(7) . . . . ?
C92 C87 C88 C89 0.4(11) . . . . ?
N23 C83 C88 C87 -177.5(7) . . . . ?
N23 C83 C88 C89 0.0(12) . . . . ?
C84 C83 C88 C87 3.1(11) . . . . ?
C84 C83 C88 C89 -179.4(7) . . . . ?
C83 C88 C89 N24 7.5(11) . . . . ?
C83 C88 C89 C90 -174.3(8) . . . . ?
C87 C88 C89 N24 -174.9(6) . . . . ?
C87 C88 C89 C90 3.3(11) . . . . ?
C95 N24 C89 C88 -137.6(7) . . . . ?
C95 N24 C89 C90 44.2(11) . . . . ?
C96 N24 C89 C88 102.0(8) . . . . ?
C96 N24 C89 C90 -76.2(10) . . . . ?
N24 C89 C90 C91 175.5(7) . . . . ?
C88 C89 C90 C91 -2.6(13) . . . . ?
C89 C90 C91 C92 -2.1(14) . . . . ?
C90 C91 C92 C87 5.7(13) . . . . ?
C86 C87 C92 C91 178.7(8) . . . . ?
C88 C87 C92 C91 -5.0(12) . . . . ?
C107 N25 C97 C98 -69.2(9) . . . . ?
C107 N25 C97 C102 110.0(7) . . . . ?
C108 N25 C97 C98 56.7(10) . . . . ?
C108 N25 C97 C102 -124.1(7) . . . . ?
N25 C97 C98 C99 -179.4(7) . . . . ?
C102 C97 C98 C99 1.4(12) . . . . ?
C97 C98 C99 C100 -0.7(13) . . . . ?
C98 C99 C100 C101 -1.1(11) . . . . ?
C99 C100 C101 C102 2.2(10) . . . . ?
C99 C100 C101 C106 179.8(7) . . . . ?
C100 C101 C102 C97 -1.5(10) . . . . ?
C100 C101 C102 C103 176.1(6) . . . . ?
C106 C101 C102 C97 -179.1(6) . . . . ?
C106 C101 C102 C103 -1.5(10) . . . . ?
N25 C97 C102 C101 -179.5(6) . . . . ?
N25 C97 C102 C103 3.1(10) . . . . ?
C98 C97 C102 C101 -0.3(11) . . . . ?
C98 C97 C102 C103 -177.7(7) . . . . ?
C97 C102 C103 N26 2.9(10) . . . . ?
C97 C102 C103 C104 -178.6(7) . . . . ?
C101 C102 C103 N26 -174.5(6) . . . . ?
C101 C102 C103 C104 3.9(10) . . . . ?
C109 N26 C103 C102 -126.5(7) . . . . ?
C109 N26 C103 C104 55.1(9) . . . . ?
C110 N26 C103 C102 108.1(7) . . . . ?
C110 N26 C103 C104 -70.3(8) . . . . ?
N26 C103 C104 C105 177.0(7) . . . . ?
C102 C103 C104 C105 -1.4(11) . . . . ?
C103 C104 C105 C106 -3.8(12) . . . . ?
C104 C105 C106 C101 6.2(12) . . . . ?
C100 C101 C106 C105 178.9(7) . . . . ?
C102 C101 C106 C105 -3.5(11) . . . . ?
C121 N27 C111 C112 57.6(8) . . . . ?
C121 N27 C111 C116 -123.0(7) . . . . ?
C122 N27 C111 C112 -67.1(8) . . . . ?
C122 N27 C111 C116 112.2(7) . . . . ?
N27 C111 C112 C113 178.3(7) . . . . ?
C116 C111 C112 C113 -1.0(11) . . . . ?
C111 C112 C113 C114 -0.9(12) . . . . ?
C112 C113 C114 C115 2.4(12) . . . . ?
C113 C114 C115 C116 -2.0(11) . . . . ?
C113 C114 C115 C120 178.5(7) . . . . ?
C114 C115 C116 C111 0.1(10) . . . . ?
C114 C115 C116 C117 -178.3(6) . . . . ?
C120 C115 C116 C111 179.7(6) . . . . ?
C120 C115 C116 C117 1.2(10) . . . . ?
N27 C111 C116 C115 -177.9(6) . . . . ?
N27 C111 C116 C117 0.5(10) . . . . ?
C112 C111 C116 C115 1.4(10) . . . . ?
C112 C111 C116 C117 179.8(6) . . . . ?
C111 C116 C117 N28 2.9(9) . . . . ?
C111 C116 C117 C118 -178.5(6) . . . . ?
C115 C116 C117 N28 -178.7(6) . . . . ?
C115 C116 C117 C118 -0.1(10) . . . . ?
C123 N28 C117 C116 -119.8(7) . . . . ?
C123 N28 C117 C118 61.5(8) . . . . ?
C124 N28 C117 C116 113.9(7) . . . . ?
C124 N28 C117 C118 -64.8(8) . . . . ?
N28 C117 C118 C119 178.4(6) . . . . ?
C116 C117 C118 C119 -0.2(11) . . . . ?
C117 C118 C119 C120 -0.6(12) . . . . ?
C118 C119 C120 C115 1.7(12) . . . . ?
C114 C115 C120 C119 177.6(7) . . . . ?
C116 C115 C120 C119 -2.0(11) . . . . ?
C135 N29 C125 C126 65.2(10) . . . . ?
C135 N29 C125 C130 -114.7(9) . . . . ?
C136 N29 C125 C126 -64.2(10) . . . . ?
C136 N29 C125 C130 115.9(9) . . . . ?
N29 C125 C126 C127 -178.9(7) . . . . ?
C130 C125 C126 C127 1.1(13) . . . . ?
C125 C126 C127 C128 -2.1(13) . . . . ?
C126 C127 C128 C129 2.3(14) . . . . ?
C127 C128 C129 C130 -1.5(13) . . . . ?
C127 C128 C129 C134 175.7(9) . . . . ?
N29 C125 C130 C129 179.7(7) . . . . ?
N29 C125 C130 C131 0.3(12) . . . . ?
C126 C125 C130 C129 -0.2(12) . . . . ?
C126 C125 C130 C131 -179.6(8) . . . . ?
C128 C129 C130 C125 0.3(11) . . . . ?
C128 C129 C130 C131 179.7(7) . . . . ?
C134 C129 C130 C125 -176.8(8) . . . . ?
C134 C129 C130 C131 2.7(12) . . . . ?
C137 N30 C131 C130 -107.3(9) . . . . ?
C137 N30 C131 C132 72.4(12) . . . . ?
C138 N30 C131 C130 132.1(9) . . . . ?
C138 N30 C131 C132 -48.2(13) . . . . ?
C125 C130 C131 N30 -5.7(12) . . . . ?
C125 C130 C131 C132 174.5(8) . . . . ?
C129 C130 C131 N30 174.9(7) . . . . ?
C129 C130 C131 C132 -4.8(12) . . . . ?
N30 C131 C132 C133 -178.3(9) . . . . ?
C130 C131 C132 C133 1.4(14) . . . . ?
C131 C132 C133 C134 4.9(15) . . . . ?
C132 C133 C134 C129 -7.0(14) . . . . ?
C128 C129 C134 C133 -173.8(8) . . . . ?
C130 C129 C134 C133 3.3(13) . . . . ?
C149 N31 C139 C140 68.6(10) . . . . ?
C149 N31 C139 C144 -110.8(8) . . . . ?
C150 N31 C139 C140 -58.5(10) . . . . ?
C150 N31 C139 C144 122.1(7) . . . . ?
N31 C139 C140 C141 -178.6(8) . . . . ?
C144 C139 C140 C141 0.8(12) . . . . ?
C139 C140 C141 C142 -0.3(14) . . . . ?
C140 C141 C142 C143 0.1(14) . . . . ?
C141 C142 C143 C144 -0.4(12) . . . . ?
C141 C142 C143 C148 179.7(8) . . . . ?
N31 C139 C144 C143 178.4(6) . . . . ?
N31 C139 C144 C145 -1.4(11) . . . . ?
C140 C139 C144 C143 -1.1(11) . . . . ?
C140 C139 C144 C145 179.1(7) . . . . ?
C142 C143 C144 C139 0.9(11) . . . . ?
C142 C143 C144 C145 -179.3(7) . . . . ?
C148 C143 C144 C139 -179.2(7) . . . . ?
C148 C143 C144 C145 0.6(11) . . . . ?
C139 C144 C145 N32 -2.0(11) . . . . ?
C139 C144 C145 C146 178.1(7) . . . . ?
C143 C144 C145 N32 178.2(6) . . . . ?
C143 C144 C145 C146 -1.7(11) . . . . ?
C151 N32 C145 C144 120.1(7) . . . . ?
C151 N32 C145 C146 -60.0(9) . . . . ?
C152 N32 C145 C144 -115.1(7) . . . . ?
C152 N32 C145 C146 64.9(9) . . . . ?
N32 C145 C146 C147 -178.7(7) . . . . ?
C144 C145 C146 C147 1.3(12) . . . . ?
C145 C146 C147 C148 0.4(13) . . . . ?
C146 C147 C148 C143 -1.4(12) . . . . ?
C142 C143 C148 C147 -179.2(8) . . . . ?
C144 C143 C148 C147 0.9(12) . . . . ?

loop_
 _geom_hbond_atom_site_label_D
 _geom_hbond_atom_site_label_H
 _geom_hbond_atom_site_label_A
 _geom_hbond_distance_DH
 _geom_hbond_distance_HA
 _geom_hbond_distance_DA
 _geom_hbond_angle_DHA
 _geom_hbond_site_symmetry_A
N1 H1 O14  0.88 2.06 2.892(8) 156.7 .
N2 H2 O7  0.88 1.90 2.773(8) 169.2 1_655
N3 H3A O1  0.88 2.06 2.896(8) 157.9 1_455
N4 H4 O12  0.88 1.88 2.739(8) 165.1 .
N5 H5 O6  0.88 2.00 2.844(7) 160.9 .
N6 H6 O16  0.88 1.91 2.770(8) 166.4 .
N7 H7 O10  0.88 2.09 2.927(8) 159.4 .
N8 H8A O4  0.88 1.89 2.751(8) 164.7 .
N9 H9 O30  0.88 2.06 2.903(8) 160.9 .
N10 H10 O24  0.88 1.96 2.823(8) 166.0 .
N11 H11 O18  0.88 2.06 2.898(7) 158.3 .
N12 H12 O27  0.88 1.92 2.783(8) 165.7 1_655
N13 H13A O22  0.88 2.10 2.931(8) 156.2 1_455
N14 H14 O32  0.88 1.94 2.807(7) 168.1 .
N15 H15 O26  0.88 2.11 2.946(7) 157.5 .
N16 H16 O20  0.88 1.90 2.763(8) 167.8 .
N17 H17N N18  1.15(9) 1.48(9) 2.616(10) 167(7) .
N19 H19N N20  0.78(9) 1.99(9) 2.608(9) 135(8) .
N21 H21N N22  1.09(9) 1.55(9) 2.596(9) 159(7) .
N24 H24N N23  0.98(9) 1.64(9) 2.585(10) 160(7) .
N25 H25N N26  1.32(8) 1.33(8) 2.576(9) 152(6) .
N28 H27N N27  0.76(8) 1.97(8) 2.602(8) 140(8) .
N30 H30N N29  0.81(10) 1.89(11) 2.591(13) 145(10) .
N31 H32N N32  1.24(7) 1.45(7) 2.581(8) 148(6) .
C108 H10E O28  0.98 2.35 3.251(10) 151.7 2_556
C108 H10F O8  0.98 2.41 3.389(11) 173.6 .
C109 H10I O21  0.98 2.48 3.221(10) 131.7 2_656
C123 H12G O31  0.98 2.46 3.433(10) 173.3 2_657
C135 H13C O3  0.98 2.27 3.209(10) 160.7 1_455
C136 H13F O23  0.98 2.37 3.341(11) 170.6 2_657
C150 H15C O11  0.98 2.53 3.462(11) 159.0 .
C151 H15F O23  0.98 2.55 3.523(9) 174.5 2_657
C152 H15H O32  0.98 2.56 3.527(11) 169.4 1_565
C44 H44 O29  0.95 2.43 3.337(9) 160.2 1_565
C51 H51A O2  0.98 2.56 3.290(11) 131.1 2_656
C53 H53B O2  0.98 2.55 3.239(10) 127.1 2_656
C54 H54B O28  0.98 2.37 3.337(10) 169.4 1_565
C54 H54C O8  0.98 2.31 3.205(10) 150.5 2_556
C58 H58 O21  0.95 2.43 3.346(9) 163.0 .
C63 H63 O13  0.95 2.56 3.386(9) 146.1 .
C66 H66A O9  0.98 2.36 3.243(11) 150.2 2_646
C67 H67A O19  0.98 2.47 3.445(10) 173.4 .
C67 H67B O15  0.98 2.36 3.232(10) 147.4 2_646
C68 H68B O9  0.98 2.54 3.282(10) 132.3 2_646
C78 H78 O2  0.95 2.40 3.335(9) 169.9 2_656
C79 H79B O29  0.98 2.42 3.246(11) 141.4 1_565
C80 H80B O19  0.98 2.31 3.208(10) 152.7 1_565
C80 H80C O15  0.98 2.38 3.353(10) 171.4 2_656
C82 H82C O29  0.98 2.46 3.347(12) 149.7 1_565
C86 H86 O17  0.95 2.59 3.469(10) 154.2 2_657
C92 H92 O17  0.95 2.59 3.452(10) 151.1 2_657
C93 H93C O31  0.98 2.34 3.303(11) 168.9 2_657
C94 H94A O11  0.98 2.33 3.194(11) 147.2 .
C95 H95B O11  0.98 2.36 3.162(12) 138.3 .
C96 H96A O31  0.98 2.54 3.495(11) 163.8 2_657
C106 H106 O9  0.95 2.39 3.282(9) 157.1 .
C112 H112 O3  0.95 2.51 3.405(9) 156.5 .
C112 H112 O4  0.95 2.54 3.355(9) 143.4 .
C118 H118 O31  0.95 2.47 3.360(9) 155.2 2_657
C106 H106 O9  0.95 2.39 3.282(9) 157.1 .
C112 H112 O3  0.95 2.51 3.405(9) 156.5 .
C112 H112 O4  0.95 2.54 3.355(9) 143.4 .
C118 H118 O31  0.95 2.47 3.360(9) 155.2 2_657
C134 H134 O25  0.95 2.51 3.379(12) 151.7 2_557
C140 H140 O11  0.95 2.59 3.451(11) 150.1 .
C146 H146 O23  0.95 2.51 3.403(10) 156.3 2_657

_diffrn_measured_fraction_theta_max    0.998
_diffrn_reflns_theta_full              25.02
_diffrn_measured_fraction_theta_full   0.998
_refine_diff_density_max    0.628
_refine_diff_density_min   -0.399
_refine_diff_density_rms    0.074

# SQUEEZE RESULTS (APPEND TO CIF)
loop_
  _platon_squeeze_void_nr
  _platon_squeeze_void_average_x
  _platon_squeeze_void_average_y
  _platon_squeeze_void_average_z
  _platon_squeeze_void_volume
  _platon_squeeze_void_count_electrons
         1     0.399     0.047     0.240     136.4      41.4
         2     0.895     0.096     0.241     129.8      38.9
         3     0.853     0.272     0.532      12.4       0.6
         4     0.105     0.596     0.759     129.8      39.0
         5     0.601     0.547     0.760     136.3      41.3
         6     0.147     0.772     0.468      12.4       0.7
_platon_squeeze_details
; ?
SQUEEZE used to remove what appeared to be either disordered solvent or 
disordered proton sponge.  This disorder could not be satisfactorily modelled
either as methanol or PS.  wR2 dropped by around 15% after SQUEEZE
;


#===END


# start Validation Reply Form

_vrf_PLAT305_1
;
PROBLEM: Isolated Hydrogen Atom (Outside Bond Range ??)         >H5O     
RESPONSE: Caused by disorder
;
_vrf_PLAT353_1
;
PROBLEM: Long    N-H Bond (0.87A)   N2     -   H2N    ...       1.18 Ang.  
RESPONSE: N--H--N bond is a well-defined interaction where the proton
sits asymmetrically between the two N-atoms.  Discussed in the text.
;
_vrf_PLAT771_1
;
PROBLEM: Suspect N-H Bond in CIF:      N1     -H2N     ..       1.47 Ang.  
RESPONSE:  N--H--N bond is a well-defined interaction where the proton
sits asymmetrically between the two N-atoms.  Discussed in the text.
;
_vrf_PLAT771_2
;
PROBLEM: Suspect N-H Bond in CIF:      N2     -H1N     ..       1.46 Ang.  
RESPONSE: N--H--N bond is a well-defined interaction where the proton
sits asymmetrically between the two N-atoms.  Discussed in the text.
;
_vrf_PLAT353_3
;
PROBLEM: Long    N-H Bond (0.87A)   N9     -   H9N    ...       1.24 Ang.  
RESPONSE: N--H--N bond is a well-defined interaction where the proton
sits asymmetrically between the two N-atoms.  Discussed in the text.
;
_vrf_PLAT771_3
;
PROBLEM: Suspect N-H Bond in CIF:      N10    -H9N     ..       1.40 Ang.  
RESPONSE: N--H--N bond is a well-defined interaction where the proton
sits asymmetrically between the two N-atoms.  Discussed in the text.
;
_vrf_PLAT353_4
;
PROBLEM: Long    N-H Bond (0.87A)   N25    -   H25N   ...       1.32 Ang.  
RESPONSE: N--H--N bond is a well-defined interaction where the proton
sits asymmetrically between the two N-atoms.  Discussed in the text.
;
_vrf_PLAT771_4
;
PROBLEM: Suspect N-H Bond in CIF:      N18    -H17N    ..       1.48 Ang.  
RESPONSE: N--H--N bond is a well-defined interaction where the proton
sits asymmetrically between the two N-atoms.  Discussed in the text.
;
# end Validation Reply Form

#===END
